# Supplementary material
Source: PubMed Central journal article supplement (PMC3958936)

## Supporting Information

### Second-generation derivatives of the eukaryotic translation initiation inhibitor pateamine A targeting eIF4A as potential anticancer agents

Woon-Kai Low<sup>a</sup>, Jing Li<sup>b</sup>, Mingzhao Zhu<sup>b</sup>, Sai Shilpa Kommaraju<sup>a</sup>, Janki Shah-Mittal<sup>a</sup>, Ken Hull<sup>b</sup>, Jun O. Liu<sup>c</sup> and Daniel Romo<sup>b,d</sup>

<sup>a</sup> Department of Pharmaceutical Sciences, College of Pharmacy and Health Sciences, St. John's University, 8000 Utopia Parkway, Queens, NY 11439, USA

<sup>b</sup> Natural Product LINCHPIN Laboratory, Department of Chemistry, Texas A&M University, P.O. Box 300012, College Station, Texas 77842-3012, USA

<sup>c</sup> Department of Pharmacology and Molecular Sciences, Johns Hopkins School of Medicine, 725 North Wolfe St., Baltimore, MD, 21205, USA

<sup>d</sup> Department of Chemistry, Texas A&M University, P.O. Box 300012, College Station, Texas 77842-3012, USA

Supporting Information Available:

Supplementary data Figure S1

Detailed procedures and characterization data (including <sup>1</sup>H and/or <sup>13</sup>C NMR spectra) for compounds **2**, **4**, **5**, **6**, **8**, **9a-g**, and **10a-g**.

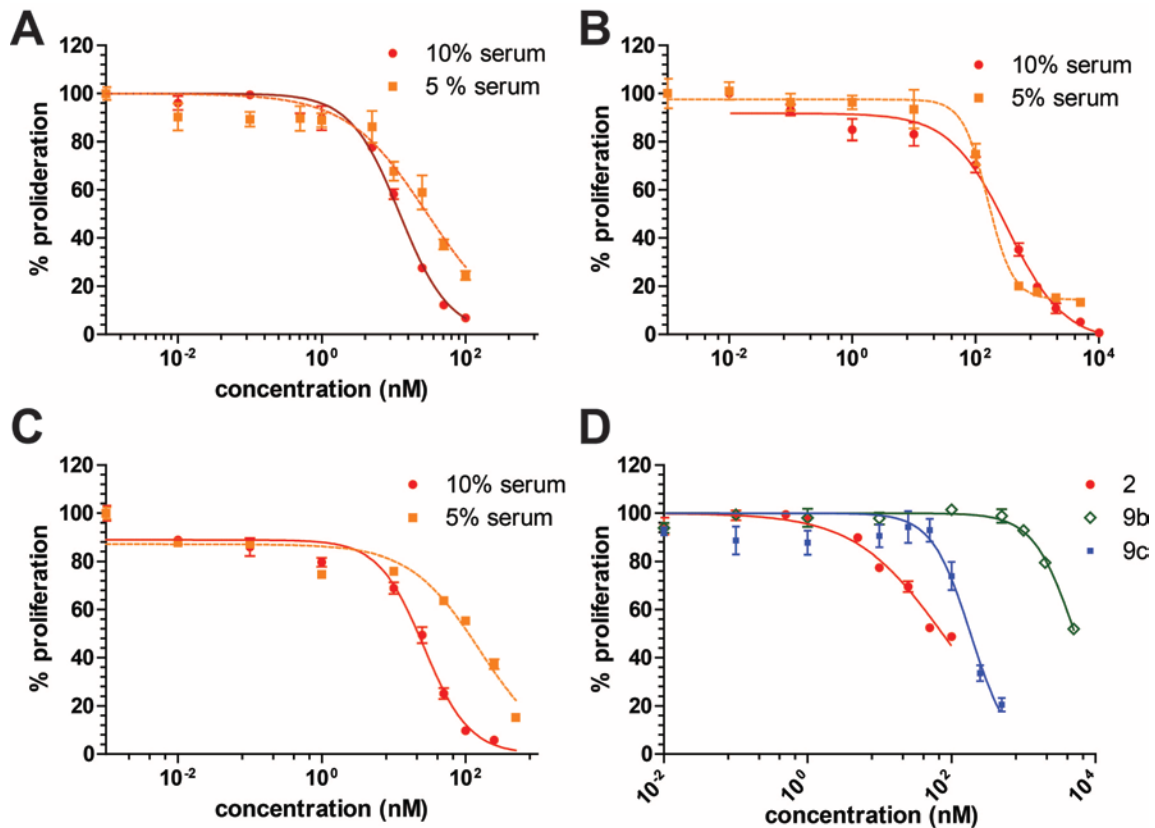

**Figure S1:** Anti-proliferation activity of **2**, **9b**, and **9c** against SK-MEL2 cell line under slower growth conditions (5% serum) and against mouse embryonic fibroblasts. (A-C) Proliferation assays were carried out as described in the main text substituting 10% FBS in growth media with 5% FBS. (D) Proliferation assay was carried out as described in the main text using immortalized mouse embryonic fibroblasts grown in DMEM media supplemented with 10% FBS. (A-D) Two independent assays were performed where each data point was replicated in quadruplicate with comparable results between the independent assays and one representative assay is shown. Each data point represents the mean of the quadruplicate assays with error bars representing  $\pm$  S.E.M. Curve fitting was performed as described in the main text. Immortalized MEF cell lines were generously provided by Dr. Andre Nussenzweig, Experimental Immunology Branch, National Cancer Institute, National Institutes of Health, Bethesda, MD 20892.

*General procedure for Stille coupling reaction (GP).* A stock solution of Pd(0) catalyst was prepared by mixing Pd<sub>2</sub>dba<sub>3</sub>•CHCl<sub>3</sub> (Aldrich, cat. no. 366315, 17 mg, 0.016 mmol) and PPh<sub>3</sub> (Aldrich, cat. no. T84409, 35 mg, 0.133 mmol) with 1 mL of degassed THF (EMD, cat. no. TX0280-7) and stirred for 5 min to give a clear yellow solution. The final concentration of Pd(0) was ~0.033 M. The macrocycle (0.025 mmol, 1equiv.) and tin reagent (0.028~0.050 mmol, 1.1~2.0 equiv.) were charged in a 5 mL round bottom flask and purged with N<sub>2</sub>. Degassed THF (0.8 ml) was added to dissolve the material to give a clear light yellow solution. To this solution was added freshly prepared Pd(0) catalyst stock solution (0.1 mL) and the mixture was stirred at room temperature under N<sub>2</sub> for 2 h. Additional 0.2 mL of Pd(0) stock solution was added and the mixture was continue stirred at room temperature for 20 h until the reaction was complete by TLC analysis. The crude reaction mixture was concentrated to dryness and the residue was purified by flash chromatography on silica gel to afford the product.

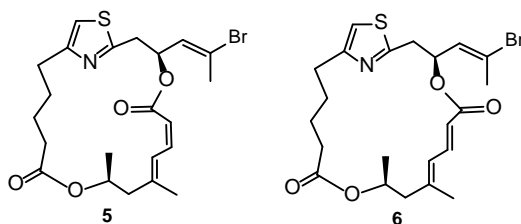

**(3*S*,6*Z*,8*E*,11*S*)-3-((*E*)-2-bromoprop-1-en-1-yl)-9,11-dimethyl-4,12-dioxa-20-thia-21-azabicyclo[16.2.1]hencosa-1(21),6,8,18-tetraene-5,13-dione (Z isomer **5** and E isomer **6**):**  
 The macrocycle enyne (**4**, 372 mg, 0.78 mmol) was charged in a 100 mL round bottom flask and dissolved in MeOH (EMD, cat. no. MX0485-7, 30 mL), Lindlar catalyst (Aldrich, cat. no. 62145, 180 mg) was added under N<sub>2</sub>. The atmosphere in the flask was exchanged to H<sub>2</sub> using standard technique, and the reaction mixture was stirred under H<sub>2</sub> atmosphere (1 atm) for 15 h until TLC analysis conformed the completion of the reaction. The mixture was filtered through a short Celite (Aldrich, cat. no. 419931) pad, rinsed with MeOH (EMD, cat. no. MX0485-7, 5 x 2 mL). The combined filtrate was concentrated and the residue was purified by flash chromatography on silica gel (10~40% EtOAc/hexane) to give Z isomer **5** (274 mg, 73%) as white foam. E isomer **6** (52 mg) was also isolated in 14% yield.

Z isomer **5**:  $^1\text{H}$  NMR (500 MHz,  $\text{CDCl}_3$ )  $\delta$  6.99 (d,  $J = 12$  Hz, 1H), 6.69 (s, 1H), 6.68 (t,  $J = 12$  Hz, 1H), 6.04 (dt,  $J = 10.5, 3.5$  Hz, 1H), 5.93 (dd,  $J = 9.5, 1.5$  Hz, 1H), 5.33 (d,  $J = 11.5$  Hz, 1H), 5.16-5.11 (m, 1H), 3.22-3.12 (m, 2H), 2.84 (dt,  $J = 14, 5.0$  Hz, 1H), 2.57 (ddd,  $J = 15, 10.5, 5.0$  Hz, 1H), 2.47 (s, 3H), 2.34 (dd,  $J = 13, 11$  Hz, 1H), 2.26 (dd,  $J = 11, 6.0$  Hz, 1H), 2.19 (dd,  $J = 11.5, 4.5$  Hz, 1H), 2.12 (d,  $J = 13.5$  Hz, 1H), 1.86-1.78 (m, 1H), 1.83 (s, 3H), 1.69-1.60 (m, 1H), 1.40-1.33 (m, 1H), 1.24 (d,  $J = 6.5$  Hz, 3H), 1.26-1.21 (m, 1H);  $^{13}\text{C}$  NMR (125 MHz,  $\text{CDCl}_3$ )  $\delta$  173.1, 164.7, 164.3, 156.7, 146.2, 141.4, 129.8, 126.9, 123.8, 114.3, 113.5, 68.9, 67.2, 48.3, 38.1, 34.6, 30.8, 28.1, 24.6, 23.1, 21.2, 16.9; HRMS (ESI+) calcd. for  $\text{C}_{22}\text{H}_{28}\text{BrNO}_4\text{S}$  ( $\text{M}+\text{H}^+$ ) 482.0995, found 482.0977.

E isomer **6**:  $^1\text{H}$  NMR (500 MHz,  $\text{CDCl}_3$ )  $\delta$  7.21 (dd,  $J = 15.5, 11.5$  Hz, 1H), 6.76 (s, 1H), 6.07 (dd,  $J = 9.0, 1.0$  Hz, 1H), 5.90-5.86 (m, 2H), 5.61 (d,  $J = 15$  Hz, 1H), 5.33-5.29 (m, 1H), 3.37 (dd,  $J = 15, 4.0$  Hz, 1H), 3.29 (dd,  $J = 15, 9.0$  Hz, 1H), 2.65-2.58 (m, 2H), 2.42 (d,  $J = 1.5$  Hz, 3H), 2.38 (ddd,  $J = 17, 6.0, 4.5$  Hz, 1H), 2.29-2.21 (m, 2H), 2.13 (ddd,  $J = 17, 10.5, 3.5$  Hz, 1H), 1.83 (s, 3H), 1.75-1.68 (m, 1H), 1.58-1.51 (m, 1H), 1.46-1.39 (m, 1H), 1.35-1.28 (m, 1H), 1.26 (d,  $J = 6.0$  Hz, 3H);  $^{13}\text{C}$  NMR (125 MHz,  $\text{CDCl}_3$ )  $\delta$  172.8, 165.7, 163.9, 157.1, 145.4, 140.5, 129.6, 126.5, 126.3, 119.7, 113.4, 69.2, 66.9, 47.8, 38.0, 33.7, 32.1, 29.9, 24.7, 24.5, 21.0, 17.5; HRMS (ESI+) calcd. for  $\text{C}_{22}\text{H}_{28}\text{BrNO}_4\text{S}$  ( $\text{M}+\text{H}^+$ ) 482.0995, found 482.0986.

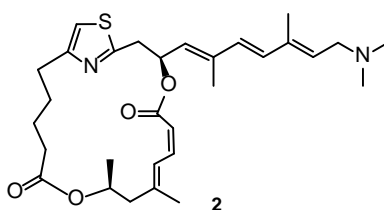

**Des-methyl-des-amino pateamine A, desired Z isomer (2).** A stock solution of Pd(0) catalyst was prepared by mixing  $\text{Pd}_2\text{dba}_3 \cdot \text{CHCl}_3$  (17 mg, 0.016 mmol) and  $\text{PPh}_3$  (35 mg, 0.133 mmol) with 1 mL of degassed THF and stirred for 5 min to give a clear yellow solution. The final concentration of Pd(0) was  $\sim 0.033$  M. The macrocycle core Z isomer (xx, JL-368-A) (12 mg, 0.025 mmol) and tin reagent (20.6 mg, 0.050 mmol) were charged in a 5 mL round bottom flask and purged with  $\text{N}_2$ . 0.8 mL of degassed THF was added to dissolve the material to give a clear light yellow solution. To this solution was added freshly prepared Pd(0) catalyst stock solution

(0.1 mL) and the mixture was stirred at room temperature under N<sub>2</sub> for 2 h. Additional 0.2 mL of Pd(0) stock solution was added and the mixture was continue stirred at room temperature for 20 h until the reaction was complete by TLC analysis. The crude reaction mixture was concentrated to dryness and the residue was purified by flash chromatography on silica gel (5%~30% MeOH/DCM) to give the desired product (13.5 mg, quantitative yield) as yellow oil. Data matched that previously reported<sup>1</sup> (significant chemical shift of few protons were observed while concentration of the samples varies) and additional <sup>13</sup>C was added this time: <sup>1</sup>H NMR (500 MHz, CDCl<sub>3</sub>) δ 6.99 (d, *J* = 12.0 Hz, 1H), 6.69 (s, 1H), 6.52 (t, *J* = 11.5 Hz, 1H), 6.36 (d, *J* = 16.5 Hz, 1H), 6.26 (dt, *J* = 9.5, 4.0 Hz, 1H), 6.23 (d, *J* = 16.5 Hz, 1H), 5.64 (t, *J* = 7.0 Hz, 1H), 5.53 (d, *J* = 9.0 Hz, 1H), 5.35 (d, *J* = 9.0 Hz, 1H), 5.16-5.11 (m, 1H), 3.18 (s, 1H), 3.14 (d, *J* = 10.5 Hz, 1H), 3.12 (d, *J* = 7.0 Hz, 2H), 2.84 (dt, *J* = 14.5, 5.0 Hz, 1H), 2.58 (ddd, *J* = 15.0, 10.5, 5.0 Hz, 1H), 2.35-2.24 (m, 2H), 2.28 (s, 6H), 2.19 (dd, *J* = 11.5, 4.5 Hz, 1H), 2.11 (d, *J* = 13.0 Hz, 1H), 2.00 (s, 3H), 1.87-1.80 (m, 1H), 1.81 (s, 3H), 1.80 (s, 3H), 1.70-1.64 (m, 1H), 1.39-1.33 (m, 1H), 1.28-1.22 (m, 1H), 1.23 (d, *J* = 6.0 Hz, 3H); <sup>1</sup>H NMR (500 MHz, C<sub>6</sub>D<sub>6</sub>) δ 7.46 (d, *J* = 12.0 Hz, 1H), 6.74 (dd, *J* = 8.5, 5.5 Hz, 1H), 6.50 (t, *J* = 11.5 Hz, 1H), 6.29 (d, *J* = 16.0 Hz, 1H), 6.26 (d, *J* = 16.0 Hz, 1H), 6.21 (s, 1H), 5.69 (t, *J* = 7.0 Hz, 1H), 5.57-5.54 (m, 2H), 5.17-5.15 (m, 1H), 3.48 (d, *J* = 6.5 Hz, 2H), 3.11-3.09 (m, 2H), 2.80-2.77 (m, 1H), 2.46-2.33 (m, 2H), 2.41 (s, 6H), 2.17-2.05 (m, 3H), 1.92 (s, 3H), 1.67 (s, 3H), 1.58 (s, 3H), 1.58-0.99 (m, 4H), 0.99 (d, *J* = 6.5 Hz, 3H); <sup>13</sup>C NMR (125 MHz, C<sub>6</sub>D<sub>6</sub>) δ 172.5, 165.2, 164.9, 157.4, 145.9, 141.4, 138.1, 133.8, 133.1, 130.8, 126.9, 124.6, 122.1, 115.3, 113.2, 69.7, 66.8, 55.1, 48.5, 42.3, 38.9, 35.0, 31.2, 30.2, 28.5, 23.7, 21.2, 16.7, 13.4, 13.1.

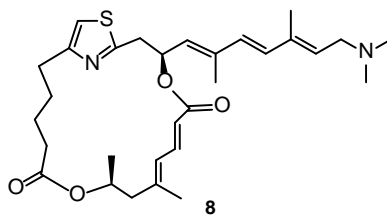

**Des-methyl-des-amino pateamine A, E isomer (8).** A stock solution of Pd(0) catalyst was prepared by mixing Pd<sub>2</sub>dba<sub>3</sub>•CHCl<sub>3</sub> (7.9 mg, 0.0075 mmol) and PPh<sub>3</sub> (16.3 mg, 0.062 mmol) with 0.46 mL of degassed THF and stirred for 5 min to give a clear yellow solution. The final

<sup>1</sup> Romo, D., Choi, N. S., Li, S., Buchler, I., Shi, Z., Liu, J. O. *J. AM. Chem. Soc.* **2004**, *126*, 10582-10588.

concentration of Pd(0) was ~0.033 M. The macrocycle core E isomer (xx, JL-368-C) (12 mg, 0.025 mmol) and tin reagent (20.6 mg, 0.050 mmol) were charged in a 5 mL round bottom flask and purged with N<sub>2</sub>. 0.8 mL of degassed THF was added to dissolve the material to give a clear light yellow solution. To this solution was added freshly prepared Pd(0) catalyst stock solution (0.1 mL) and the mixture was stirred at room temperature under N<sub>2</sub> for 3 h. Additional 0.2 mL of Pd(0) stock solution was added and the mixture was continue stirred at room temperature for 20 h. The crude reaction mixture was concentrated to dryness and the residue was purified by flash chromatography on silica gel (5%~30% MeOH/DCM) to give the desired product (5.9 mg, 45% yield) as yellow oil. 5.6 mg of starting material (macrocycle core) was recovered in 47% yield. Data of DMDAPat A E isomer: <sup>1</sup>H NMR (500 MHz, CDCl<sub>3</sub>) δ 7.21 (dd, *J* = 15.5, 11.5 Hz, 1H), 6.75 (s, 1H), 6.37 (d, *J* = 15.5 Hz, 1H), 6.26 (d, *J* = 16.0 Hz, 1H), 6.10 (dt, *J* = 9.0, 4.0 Hz, 1H), 5.86 (d, *J* = 12.0 Hz, 1H), 5.68 (d, *J* = 8.5 Hz, 1H), 5.63 (dd, *J* = 15.5, 7.0 Hz, 1H), 5.61 (d, *J* = 16.0 Hz, 1H), 5.34-5.28 (m, 1H), 3.43 (dd, *J* = 14.5, 4.0 Hz, 1H), 3.27 (dd, *J* = 15.0, 8.5 Hz, 1H), 3.07 (d, *J* = 7.5 Hz, 2H), 2.66-2.58 (m, 2H), 2.39 (ddd, *J* = 16.5, 5.5, 4.0 Hz, 1H), 2.25 (s, 6H), 2.25-2.20 (m, 2H), 2.15-2.08 (m, 1H), 1.96 (s, 3H), 1.82 (s, 6H), 1.78-1.51 (m, 3H), 1.36-1.25 (m, 1H), 1.26 (d, *J* = 6.0 Hz, 3H); <sup>13</sup>C NMR (125 MHz, CDCl<sub>3</sub>) δ 172.8, 165.9, 164.5, 157.1, 144.9, 140.1, 137.5, 132.8, 132.3, 129.8, 128.7, 128.6, 126.3, 120.3, 113.4, 69.5, 66.9, 56.0, 47.8, 43.4, 38.6, 34.6, 33.8, 32.2, 24.7, 23.5, 21.0, 17.5, 13.4, 13.1; HRMS (MALDI+) calcd. for C<sub>30</sub>H<sub>42</sub>N<sub>2</sub>O<sub>4</sub>S (M+H<sup>+</sup>) calc. 527.2938, found 527.2962.

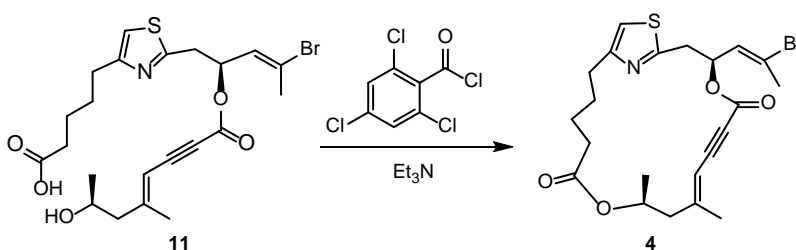

**Enyne macrocyclic lactone 4.** To a solution of **11** (165 mg, 0.331 mmol) in THF (8.0 ml) were added Et<sub>3</sub>N (277 μl, 1.99 mmol) and 2,4,6-trichlorobenzoyl chloride (1.754 mmol, 274 μl) at 0 °C under N<sub>2</sub>. The mixture was continued to be stirred at 0 °C for 20 minutes and was transferred to a solution of DMAP (404 mg, 3.31 mmol) in toluene (160 ml) at room temperature. The reaction was complete within 1 hour. The mixture was diluted with 100 ml of EtOAc and was washed with

brine. The organic layer was dried over MgSO<sub>4</sub> and concentrated. The residue was submitted to a flash chromatography (hexanes : MTBE = 10:1 → 3:1) to give the title product as a colorless oil (136 mg, 86%). <sup>1</sup>H NMR (500 MHz, CDCl<sub>3</sub>) δ 6.80 (s, 1H), 6.03 (dt, *J* = 9.3, 1.3 Hz, 1H), 5.88 (ddd, *J* = 9.2, 8.0, 4.9 Hz, 1H), 5.33 (d, *J* = 0.9 Hz, 1H), 5.31-5.22 (m, 1H), 3.33 (dd, *J* = 15.0, 4.9 Hz, 1H), 3.29 (dd, *J* = 15.0, 8.1 Hz, 1H), 2.71 (ddd, *J* = 14.2, 10.5, 5.7 Hz, 1H), 2.65 (ddd, *J* = 14.2, 10.7, 4.9 Hz, 1H), 2.43-2.38 (m, 1H), 2.40 (d, *J* = 1.3 Hz, 3H), 2.28 (d, *J* = 7.2 Hz, 2H), 2.19 (ddd, *J* = 17.0, 10.2, 4.0 Hz, 1H), 1.94 (d, *J* = 1.2 Hz, 1H), 1.83-1.71 (m, 2H), 1.53-1.45 (m, 2H), 1.26 (d, *J* = 6.3 Hz, 3H); <sup>13</sup>C NMR (125 MHz, CDCl<sub>3</sub>) δ 172.7, 163.5, 157.8, 157.4, 153.4, 128.9, 127.2, 113.7, 105.7, 85.5, 83.6, 71.0, 66.8, 46.5, 38.0, 33.8, 32.2, 29.6, 24.7, 24.6, 21.0, 20.3. HRMS (ESI+) calcd. for C<sub>22</sub>H<sub>27</sub>BrNO<sub>4</sub>S (M+H<sup>+</sup>) calc. 480.0844, found 480.0866.

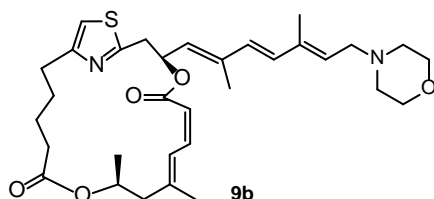

**Diene 9b.** The reaction between **5** (6.0 mg, 0.0124 mmol) and organotin reagent **7b** (11.3 mg, 0.0248 mmol) was out carried based on the GP. The crude product was purified by flash chromatography on silica gel (CH<sub>2</sub>Cl<sub>2</sub> : MeOH = 100:1 → 40:1) to give **9b** as a colorless oil (4.5 mg, 64%). <sup>1</sup>H NMR (500 MHz, CDCl<sub>3</sub>) δ 7.00 (d, *J* = 11.6 Hz, 1H), 6.70 (s, 1H), 6.66 (t, *J* = 11.6 Hz, 1H), 6.36 (d, *J* = 16.0 Hz, 1H), 6.26 (ddd, *J* = 10.1, 9.0, 4.1 Hz, 1H), 6.23 (d, *J* = 16.0 Hz, 1H), 5.63 (t, *J* = 7.0 Hz, 1H), 5.53 (d, *J* = 9.0 Hz, 1H), 5.36 (d, *J* = 11.5 Hz, 1H), 5.14 (ddq, *J* = 10.9, 1.5, 6.4 Hz, 1H), 3.72 (t, *J* = 4.5 Hz, 4H), 3.21 (dd, *J* = 14.4, 4.1 Hz, 1H), 3.16 (dd, *J* = 14.4, 10.1 Hz, 1H), 3.14 (d, *J* = 7.0 Hz, 2H), 2.86 (dt, *J* = 14.5, 4.9 Hz, 1H), 2.59 (ddd, *J* = 14.5, 10.6, 4.5 Hz, 1H), 2.48 (brs, 4H), 2.34 (dd, *J* = 13.1, 10.9 Hz, 1H), 2.29 (ddd, *J* = 15.9, 11.2, 6.1 Hz, 1H), 2.18 (ddd, *J* = 15.9, 11.3, 4.3 Hz, 1H), 2.01 (d, *J* = 1.0 Hz, 3H), 1.82 (s, 3H), 1.81 (s, 3H), 1.72-1.60 (m, 2H), 1.41-1.32 (m, 2H), 1.24 (d, *J* = 6.4 Hz, 3H). <sup>13</sup>C NMR (125 MHz, CDCl<sub>3</sub>) δ 173.4, 168.0, 165.5, 164.7, 156.8, 145.8, 141.0, 138.2, 134.1, 132.7, 131.1, 129.0, 124.2, 115.1, 113.5, 69.5, 69.4, 67.3/67.2, 56.8, 54.0, 48.5, 39.0, 34.9, 30.6, 29.2, 24.0, 23.2, 16.9, 14.3, 11.2. HRMS (ESI+) calcd. for C<sub>32</sub>H<sub>45</sub>N<sub>2</sub>O<sub>5</sub>S (M+H<sup>+</sup>) calc. 569.3049, found 569.3062.

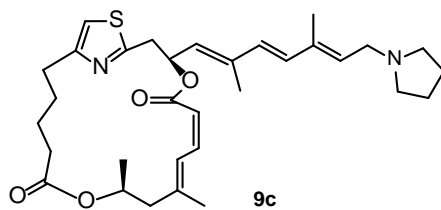

**Diene 9c.** Following the GP, **5** (5.0 mg, 0.0104 mmol) coupled with **7c** (9.2 mg, 0.0208 mmol). The crude product was purified by flash chromatography on silica gel (hexanes:acetone:Et<sub>3</sub>N = 150:75:1) to provide **9c** as a yellow oil (3.0 mg, 52%). <sup>1</sup>H NMR (500 MHz, CDCl<sub>3</sub>) δ 7.00 (d, *J* = 11.6 Hz, 1H), 6.70 (s, 1H), 6.67 (t, *J* = 11.8 Hz, 1H), 6.37 (d, *J* = 15.9 Hz, 1H), 6.27 (d, *J* = 15.9 Hz, 1H), 6.29-6.24 (m, 1H), 5.75 (t, *J* = 6.7 Hz, 1H), 5.56 (d, *J* = 8.7 Hz, 1H), 5.36 (d, *J* = 11.5 Hz, 1H), 5.15 (dq, *J* = 10.7, 5.7 Hz, 1H), 3.62-3.49 (m, 2H), 3.22-3.14 (m, 2H), 2.95-2.90 (m, 4H), 2.82-2.76 (m, 1H), 2.52 (ddd, *J* = 14.4, 10.3, 4.4 Hz, 1H), 2.30-2.20 (m, 2H), 2.15-2.08 (m, 1H), 2.05 (d, *J* = 12.9 Hz, 1H), 1.94 (s, 3H), 1.78 (s, 3H), 1.76 (s, 3H), 1.72-1.64 (m, 2H), 1.43-1.33 (m, 2H), 1.26 (t, *J* = 7.1 Hz, 4H), 1.17 (d, *J* = 6.2 Hz, 1H). <sup>13</sup>C NMR (125 MHz, CDCl<sub>3</sub>) δ 173.4, 169.7, 165.4, 164.7, 156.9, 145.9, 140.1, 138.0, 133.0, 130.2, 124.2, 115.0, 113.5, 69.4, 67.3, 53.6, 53.1, 48.5, 39.0, 34.9, 31.0, 28.3, 23.8, 23.4, 21.4, 16.9, 14.4, 13.1. HRMS (APCI+) calcd. for C<sub>32</sub>H<sub>45</sub>N<sub>2</sub>O<sub>4</sub>S (M+H<sup>+</sup>) calc. 553.3100, found 553.3093.

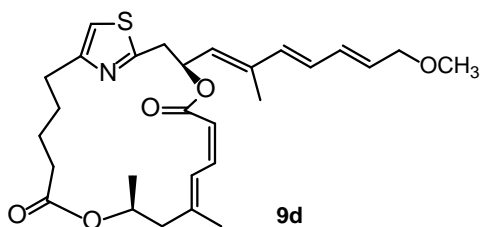

**Diene 9d.** Following the GP, **5** (10.0 mg, 0.0207 mmol) coupled with **7d** (9.2 mg, 0.0228 mmol). The crude product was purified by flash chromatography on silica gel (1% → 4% MeOH/CH<sub>2</sub>Cl<sub>2</sub>) to provide **9d** as a yellow oil (5.5 mg, 53%). <sup>1</sup>H NMR (500 MHz, CDCl<sub>3</sub>) δ 7.00 (d, *J* = 11.8 Hz, 1H), 6.70 (s, 1H), 6.66 (t, *J* = 11.6 Hz, 1H), 6.36-6.22 (m, 3H), 5.81 (dt, *J* = 14.3, 6.2 Hz, 1H), 5.51 (d, *J* = 9.0 Hz, 1H), 5.36 (d, *J* = 11.5 Hz, 1H), 5.14 (dq, *J* = 10.9, 6.1, 1.3 Hz, 1H), 3.98 (d, *J* = 6.1 Hz, 1H), 3.34 (s, 3H), 3.20 (dd, *J* = 14.3, 3.0 Hz, 1H), 3.15 (dd, *J* = 14.3, 10.3 Hz, 1H), 2.85 (dt, *J* = 14.5, 5.1 Hz, 1H), 2.58 (ddd, *J* = 14.8, 10.4, 4.4 Hz, 1H), 2.33 (dd, *J* = 13.2, 11.1 Hz, 1H), 2.29 (ddd, *J* = 16.0, 11.1, 6.2 Hz, 1H), 2.18 (ddd, *J* = 16.0, 11.5, 4.7 Hz, 1H), 2.12 (d, *J* = 13.2 Hz, 1H), 1.99 (s, 3H), 1.90-1.79 (m, 1H), 1.82 (s, 3H), 1.72-1.61 (m, 1H), 1.41-1.32 (m, 1H),



1.29-1.19 (m, 1H), 1.23 (d, J = 6.4 Hz, 3H).  $^{13}\text{C}$  NMR (125 MHz,  $\text{CDCl}_3$ )  $\delta$  173.4, 165.5, 164.7, 156.8, 145.9, 141.1, 138.0, 136.7, 133.0, 130.4, 129.4, 129.2, 124.2, 115.0, 113.5, 73.0, 69.4, 67.3, 58.1, 48.5, 39.0, 34.9, 31.0, 29.9, 28.3, 23.4, 17.0, 13.5. HRMS (ESI+) calcd. for  $\text{C}_{28}\text{H}_{38}\text{NO}_5\text{S}$  ( $\text{M}+\text{H}^+$ ) calcd. 500.2471, found 500.2449.

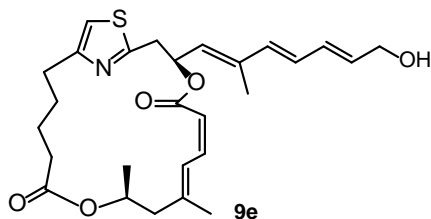

**Diene 9e.** Following the GP, **5** (5.0 mg, 0.0104 mmol) coupled with **7e** (7.8 mg, 0.0208 mmol). The crude product was purified by flash chromatography on silica gel (2%  $\rightarrow$  5% MeOH/ $\text{CH}_2\text{Cl}_2$ ) to provide **9e** as a yellow oil (3.0 mg, 60%).  $^1\text{H}$  NMR (500 MHz,  $\text{CDCl}_3$ )  $\delta$  6.99 (d, J = 11.7 Hz, 1H), 6.74-6.71 (m, 1H), 6.67 (t, J = 11.6 Hz, 1H), 6.36-6.24 (m, 3H), 6.23 (d, J = 14.6 Hz, 1H), 5.91 (dt, J = 14.0, 5.8 Hz, 1H), 5.51 (d, J = 8.9 Hz, 1H), 5.36 (d, J = 11.4 Hz, 1H), 5.17-5.11 (m, 1H), 4.22 (d, J = 5.8 Hz, 1H), 3.25 (brs, 1H), 3.17 (dd, J = 13.5, 11.7 Hz, 1H), 2.89 (d, J = 13.2 Hz, 1H), 2.6 (ddd, J = 14.5, 10.8, 4.5 Hz, 1H), 2.33 (dd, J = 13.0, 11.4 Hz, 1H), 2.30 (ddd, J = 16.1, 11.1, 6.1 Hz, 1H), 2.18 (ddd, J = 16.1, 11.3, 4.5 Hz, 1H), 2.12 (d, J = 13.0 Hz, 1H), 2.00 (s, 3H), 1.91-1.80 (m, 2H), 1.82 (s, 3H), 1.73-1.61 (m, 2H), 1.24 (d, J = 6.4 Hz, 3H).  $^{13}\text{C}$  NMR (125 MHz,  $\text{CDCl}_3$ )  $\delta$  173.2, 166.0, 164.7, 156.7, 146.0, 141.3, 138.1, 136.6, 133.0, 131.6, 129.2, 128.1, 124.2, 114.9, 113.8, 69.3, 67.4, 63.6, 48.5, 38.8, 34.9, 30.8, 29.9, 28.2, 23.3, 17.0, 13.5. HRMS (ESI+) calcd. for  $\text{C}_{27}\text{H}_{36}\text{NO}_5\text{S}$  ( $\text{M}+\text{H}^+$ ) calcd. 486.2314, found 486.2297.

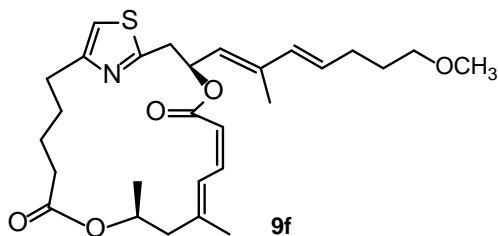

**Diene 9f.** Following the GP, **5** (5.0 mg, 0.0104 mmol) coupled with **7f** (7.8 mg, 0.0208 mmol). The crude product was purified by flash chromatography on silica gel (hexanes:EtOAc = 3:1) to provide **9f** as a yellow oil (2.7 mg, 52%).  $^1\text{H}$  NMR (300 MHz,  $\text{CDCl}_3$ )  $\delta$  7.00 (d,  $J$  = 11.7 Hz, 1H), 6.71 (s, 1H), 6.66 (t,  $J$  = 11.5 Hz, 1H), 6.29-6.16 (m, 1H), 6.07 (d,  $J$  = 15.8 Hz, 1H), 5.77 (dt,  $J$  = 15.5, 6.9 Hz, 1H), 5.36 (d,  $J$  = 11.5 Hz, 1H), 5.19-5.10 (m, 1H), 3.38 (t,  $J$  = 6.51 Hz, 1H), 3.33 (s, 3H), 3.26-3.13 (m, 2H), 2.93-2.81 (m, 1H), 2.65-2.54 (m, 1H), 2.37-2.17 (m, 2H), 2.12 (d,  $J$  = 13.2 Hz, 1H), 1.97 (s, 3H), 1.83 (s, 3H), 1.73-1.62 (m, 4H), 1.37-1.28 (m, 2H), 1.24 (d,  $J$  = 7.2 Hz, 3H).

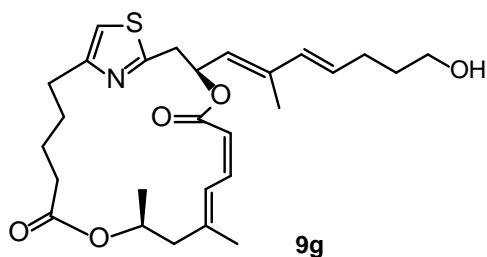

**Diene 9g.** Following the GP, **5** (5.0 mg, 0.0104 mmol) coupled with **7g** (7.8 mg, 0.0208 mmol). The crude product was purified by flash chromatography on silica gel (1%  $\rightarrow$  2% MeOH/ $\text{CH}_2\text{Cl}_2$ ) to provide **9g** as a yellow oil (2.1 mg, 41%).  $^1\text{H}$  NMR (500 MHz,  $\text{CDCl}_3$ )  $\delta$  7.00 (d,  $J$  = 11.8 Hz, 1H), 6.71 (s, 1H), 6.66 (t,  $J$  = 11.5 Hz, 1H), 6.27-6.22 (m, 1H), 6.10 (d,  $J$  = 15.5 Hz, 1H), 5.78 (dt,  $J$  = 15.6, 6.9 Hz, 1H), 5.40 (d,  $J$  = 9.0 Hz, 1H), 5.36 (d,  $J$  = 11.5 Hz, 1H), 5.14 (dq,  $J$  = 11.2, 6.2 Hz, 1H), 3.67 (t,  $J$  = 6.4 Hz, 1H), 3.23-3.14 (m, 2H), 2.90-2.84 (m, 1H), 2.59 (ddd,  $J$  = 14.5, 10.7, 4.4 Hz, 1H), 2.33 (dd,  $J$  = 13.1, 10.9 Hz, 1H), 2.32-2.15 (m, 2H), 2.12 (d,  $J$  = 13.1 Hz, 1H), 1.97 (s, 3H), 1.82 (s, 3H), 1.72-1.65 (m, 4H), 1.42-1.32 (m, 2H), 1.24 (d,  $J$  = 6.4 Hz, 3H).  $^{13}\text{C}$  NMR (125 MHz,  $\text{CDCl}_3$ )  $\delta$  173.4, 165.5, 164.6, 156.6, 145.6, 140.8, 137.9, 134.2, 130.8, 126.9, 124.0, 115.0, 113.3, 69.2, 67.2, 62.4, 48.3, 38.8, 34.7, 32.3, 29.7, 29.2, 28.1, 23.2, 21.2, 16.8, 13.4. HRMS (ESI+) calcd. for  $\text{C}_{27}\text{H}_{38}\text{NO}_5\text{S}$  ( $\text{M}+\text{H}^+$ ) calc. 488.2471, found 488.2492.

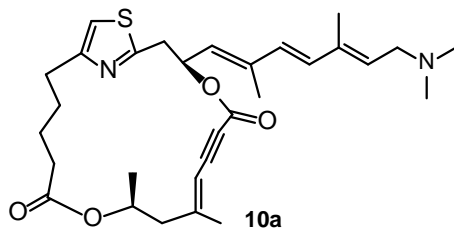

**Enyne 10a.** Following the GP, **4** (8.0 mg, 0.0167 mmol) coupled with **7a** (8.3 mg, 0.0200 mmol). The crude product was purified by flash chromatography on silica gel (1% → 5% MeOH/CH<sub>2</sub>Cl<sub>2</sub>) to provide **10a** as a yellow oil (3.5 mg, 40%). <sup>1</sup>H NMR (500 MHz, CDCl<sub>3</sub>) δ 6.77 (s, 1H), 6.42 (d, J = 15.8 Hz, 1H), 6.38 (d, J = 15.8 Hz, 1H), 6.12-6.07 (m, 1H), 5.80-5.71 (m, 2H), 5.35 (s, 1H), 5.28-5.21 (m, 1H), 3.26-3.16 (m, 4H), 2.94-2.91 (m, 2H), 2.79-2.76 (m, 6H), 2.64-2.57 (m, 1H), 2.29 (d, J = 6.5 Hz, 2H), 2.14-2.06 (m, 1H), 1.96 (s, 3H), 1.90-1.86 (m, 2H), 1.87 (s, 3H), 1.79 (s, 3H), 1.65-1.58 (m, 2H), 1.27 (d, J = 6.3 Hz, 1H). HRMS (ESI+) calcd. for C<sub>30</sub>H<sub>41</sub>N<sub>2</sub>O<sub>4</sub>S (M+H<sup>+</sup>) calc. 525.2787, found 525.2778.

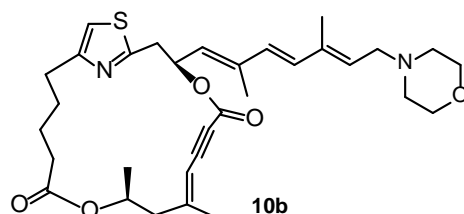

**Enyne 10b.** Following the GP, **4** (10.0 mg, 0.0208 mmol) coupled with **7b** (19.0 mg, 0.0416 mmol). The crude product was purified by flash chromatography on silica gel (1% → 5% MeOH/CH<sub>2</sub>Cl<sub>2</sub>) to provide **10b** as a yellow oil (4.5 mg, 38%). <sup>1</sup>H NMR (500 MHz, CDCl<sub>3</sub>) δ 6.79 (s, 1H), 6.36 (d, J = 16.2 Hz, 1H), 6.24 (d, J = 16.2 Hz, 1H), 6.10 (ddd, J = 12.3, 8.4, 3.5 Hz, 1H), 5.63 (t, J = 5.6 Hz, 1H), 5.33 (s, 1H), 5.31-5.23 (m, 1H), 3.72 (t, J = 4.2 Hz, 4H), 3.39-3.26 (m, 2H), 3.16-3.10 (m, 2H), 2.75-2.63 (m, 2H), 2.47 (s, 4H), 2.43-2.36 (m, 1H), 2.27 (d, J = 7.1 Hz, 1H), 2.24-2.15 (m, 1H), 1.94 (s, 3H), 1.93 (s, 3H), 1.82 (s, 3H), 1.75-1.69 (m, 2H), 1.52-1.47 (m, 2H), 1.25 (d, J = 6.1 Hz, 3H). HRMS (ESI+) calcd. for C<sub>32</sub>H<sub>43</sub>N<sub>2</sub>O<sub>5</sub>S (M+H<sup>+</sup>) calc. 567.2893, found 567.2870.

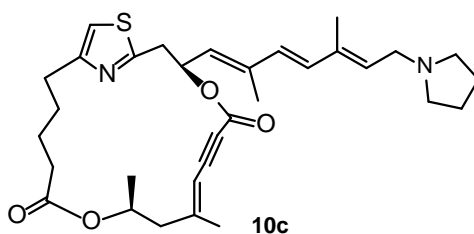

**Enyne 10c.** Following the GP, **4** (10.0 mg, 0.0208 mmol) coupled with **7c** (18.0 mg, 0.0416 mmol). The crude product was purified by flash chromatography on silica gel (1% → 5% MeOH/CH<sub>2</sub>Cl<sub>2</sub>) to provide **10c** as a yellow oil (4.2 mg, 37%). <sup>1</sup>H NMR (500 MHz, CDCl<sub>3</sub>) δ 6.79 (s, 1H), 6.37-6.32 (m, 2H), 5.81-5.72 (m, 2H), 5.66 (d, J = 9.0 Hz, 1H), 5.33 (s, 1H), 5.28-5.24 (m, 1H), 3.66-3.55 (m, 2H), 3.37-3.27 (m, 2H), 2.97 (brs, 6H), 2.73-2.63 (m, 2H), 2.44-2.37 (m, 1H), 2.27 (d, J = 6.9 Hz, 2H), 2.04-2.00 (s, 4H), 1.94 (s, 3H), 1.87 (s, 3H), 1.85 (s, 3H), 1.81-1.70 (m, 2H), 1.52-1.44 (m, 2H), 1.26 (d, J = 5.8 Hz, 3H). HRMS (ESI+) calcd. for C<sub>32</sub>H<sub>43</sub>N<sub>2</sub>O<sub>4</sub>S (M+H<sup>+</sup>) calc. 551.2944, found 551.2922.

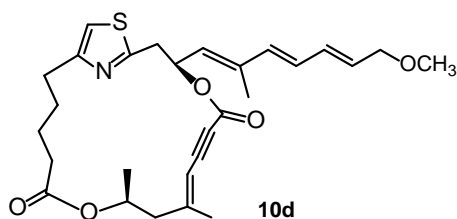

**Enyne 10d.** Following the GP, **4** (16.0 mg, 0.0333 mmol) coupled with **7d** (19.3 mg, 0.050 mmol). The crude product was purified by flash chromatography on silica gel (hexanes:MTBE = 2:1) to provide **10d** as a yellow oil (11.0 mg, 66%). <sup>1</sup>H NMR (500 MHz, CDCl<sub>3</sub>) δ 6.79 (s, 1H), 6.40-6.24 (m, 2H), 6.08 (td, J = 8.7, 4.3 Hz, 1H), 5.89-5.80 (m, 1H), 5.60 (d, J = 8.3 Hz, 1H), 5.33 (s, 1H), 5.31-5.23 (m, 1H), 4.02-3.98 (m, 2H), 3.35 (s, 3H), 3.31-3.26 (m, 2H), 2.75-2.62 (m, 2H), 2.45-2.38 (m, 1H), 2.27 (d, J = 7.3 Hz, 1H), 2.26-2.17 (m, 1H), 1.95 (s, 3H), 1.92 (s, 3H), 1.84-1.76 (m, 2H), 1.53-1.47 (m, 2H), 1.26 (d, J = 6.3 Hz, 1H). HRMS (ESI+) calcd. for C<sub>28</sub>H<sub>35</sub>NO<sub>5</sub>S (M+H<sup>+</sup>) calc. 498.2314, found 498.2308.

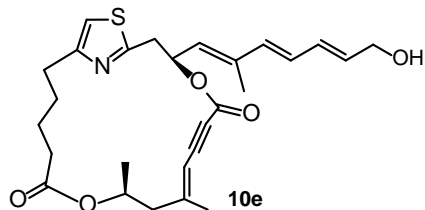

**Enyne 10e.** Following the GP, **4** (8.0 mg, 0.0167 mmol) coupled with **7e** (7.5 mg, 0.020 mmol). The crude product was purified by flash chromatography on silica gel (hexanes:EtOAc = 2:1) to provide **10e** as a yellow oil (3.2 mg, 40%). <sup>1</sup>H NMR (500 MHz, CDCl<sub>3</sub>) δ 6.79 (s, 1H), 6.35-6.30 (m, 1H), 6.28-6.24 (m, 1H), 6.08 (td, J = 8.8, 4.0 Hz, 1H), 5.92 (dt, J = 14.0, 5.9 Hz, 1H), 5.61 (d, J = 8.5 Hz, 1H), 5.33 (s, 1H), 5.29-5.24 (m, 1H), 4.23 (t, J = 4.7 Hz, 1H), 3.39-3.26 (m, 2H),

2.74-2.60 (m, 2H), 2.44-2.39 (m, 1H), 2.27 (d,  $J = 7.2$  Hz, 1H), 2.25-2.19 (m, 1H), 1.95 (brs, 3H), 1.92 (s, 3H), 1.83-1.74 (m, 2H), 1.53-1.46 (m, 2H), 1.26 (d,  $J = 6.5$  Hz, 1H). HRMS (ESI+) calcd. for  $C_{27}H_{34}NO_5S$  ( $M+H^+$ ) calc. 484.2158, found 484.2175.

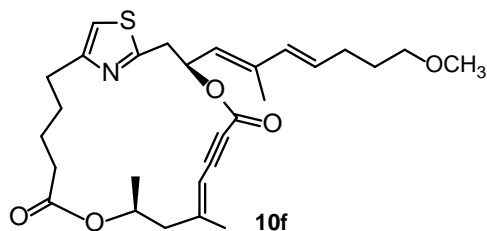

**Enyne 10f.** Following the GP, **4** (10.0 mg, 0.0208 mmol) coupled with **7f** (16.2 mg, 0.0416 mmol). The crude product was purified by flash chromatography on silica gel (hexanes:MTBE = 2:1) to provide **10f** as a yellow oil (4.0 mg, 38%). <sup>1</sup>H NMR (500 MHz, CDCl<sub>3</sub>)  $\delta$  6.81 (s, 1H), 6.11-6.02 (m, 1H), 6.10 (d,  $J = 15.7$  Hz, 1H), 5.85-5.76 (m, 1H), 5.48 (d,  $J = 15.7$  Hz, 1H), 5.33 (s, 1H), 5.30-5.24 (m, 1H), 3.39 (t,  $J = 6.15$  Hz, 1H), 3.35-3.29 (m, 2H), 3.34 (s, 3H), 2.77-2.63 (m, 2H), 2.44-2.39 (m, 1H), 2.35-2.29 (m, 1H), 2.27 (d,  $J = 6.9$  Hz, 2H), 2.24-2.17 (m, 2H), 1.95 (s, 3H), 1.89 (s, 3H), 1.83-1.76 (m, 2H), 1.72-1.66 (m, 2H), 1.54-1.46 (m, 2H), 1.25 (brs, 3H). HRMS (ESI+) calcd. for  $C_{28}H_{38}NO_5S$  ( $M+H^+$ ) calc. 500.2471, found 500.2483.

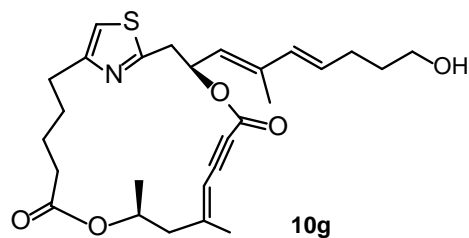

**Enyne 10g.** Following the GP, **4** (10.0 mg, 0.0208 mmol) coupled with **7g** (15.6 mg, 0.0416 mmol). The crude product was purified by flash chromatography on silica gel (hexanes:EtOAc = 1:1) to provide **10g** as a yellow oil (4.9 mg, 48%). <sup>1</sup>H NMR (500 MHz, CDCl<sub>3</sub>)  $\delta$  6.79 (s, 1H), 6.12 (d,  $J = 15.1$  Hz, 1H), 6.09-6.05 (m, 1H), 5.80 (dt,  $J = 15.8, 6.9$  Hz, 1H), 5.47 (d,  $J = 15.1$  Hz, 1H), 5.32 (s, 1H), 5.29-5.25 (m, 1H), 3.71-3.68 (m, 2H), 3.42-3.28 (m, 2H), 2.77-2.65 (m, 2H), 2.45-2.35 (m, 1H), 2.29 (d,  $J = 7.1$  Hz, 2H), 2.25 (q,  $J = 7.2$  Hz, 2H), 2.21-2.16 (m, 1H), 1.97 (s,

3H), 1.91 (s, 3H), 1.83-1.76 (m, 2H), 1.75-1.67 (m, 2H), 1.53-1.45 (m, 2H), 1.28 (d, J = 6.8 Hz, 3H). HRMS (ESI+) calcd. for  $C_{27}H_{36}NO_5S$  ( $M+H^+$ ) calc. 486.2314, found 486.2309.

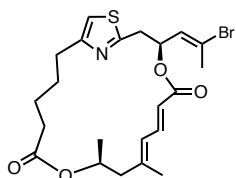

LC/MS of 6

Chemical Formula:  $C_{22}H_{28}BrNO_4S$   
 Exact Mass: 481.0922  
 Molecular Weight: 482.4310

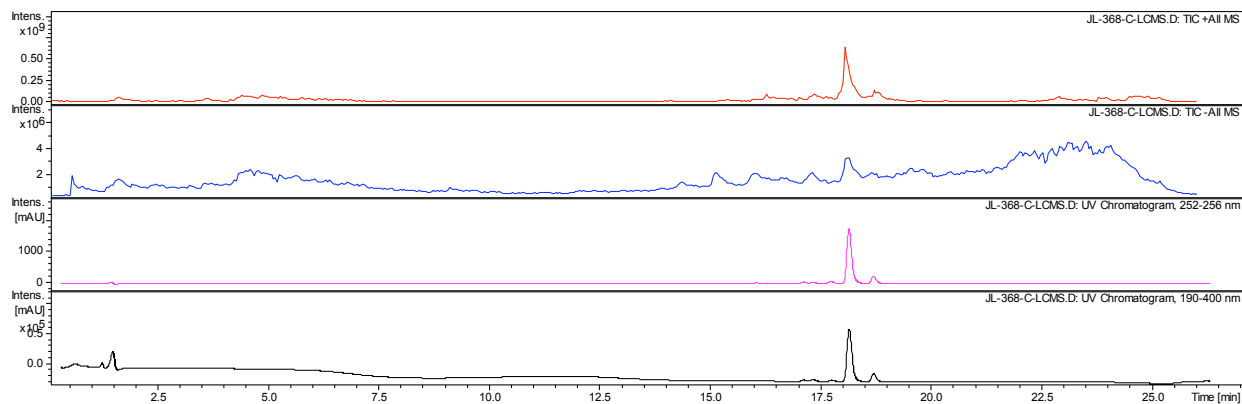

Major peaks (+ mode):

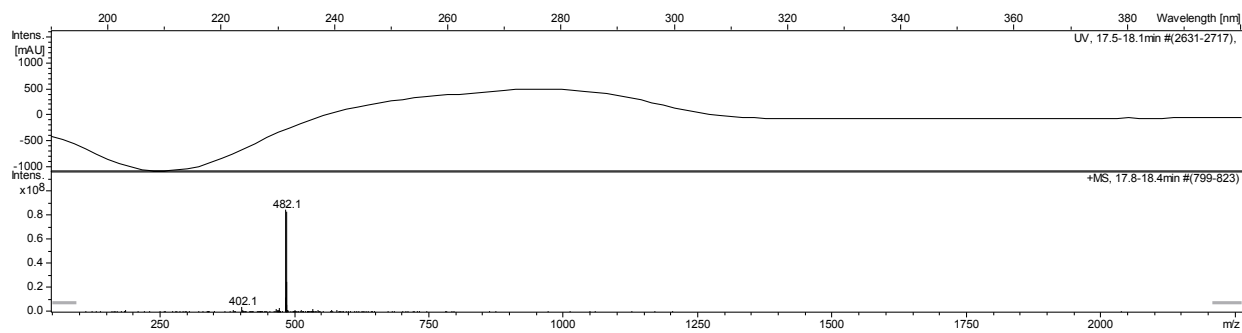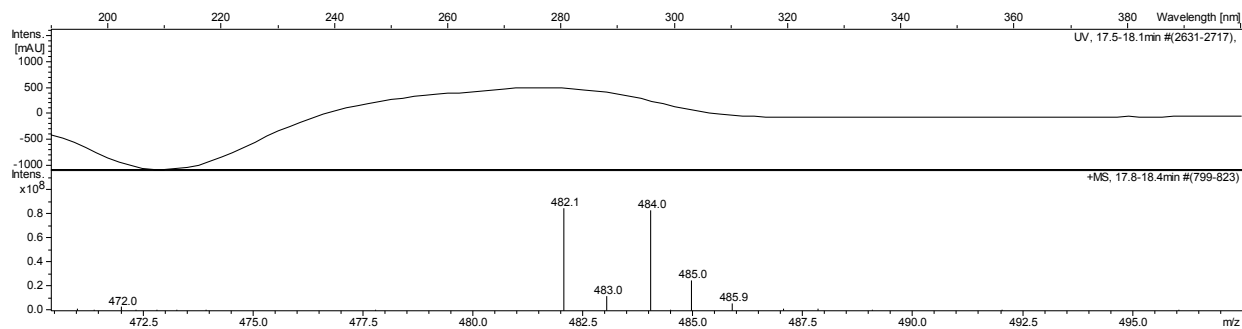

Major peaks (- mode):

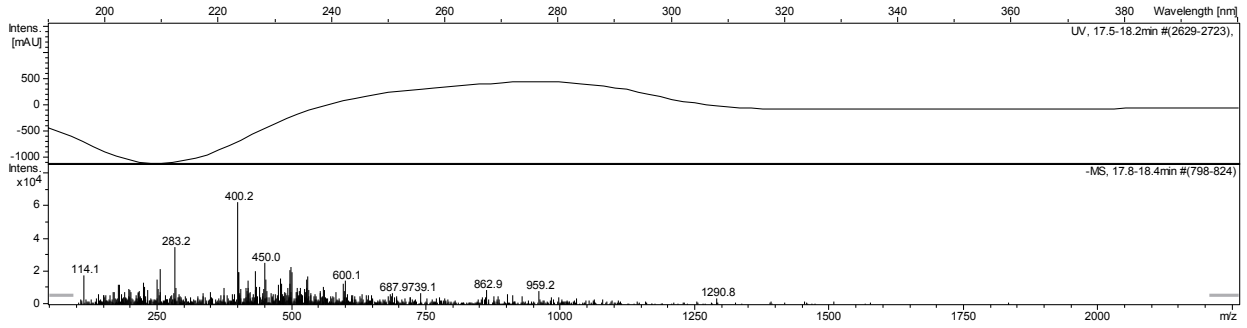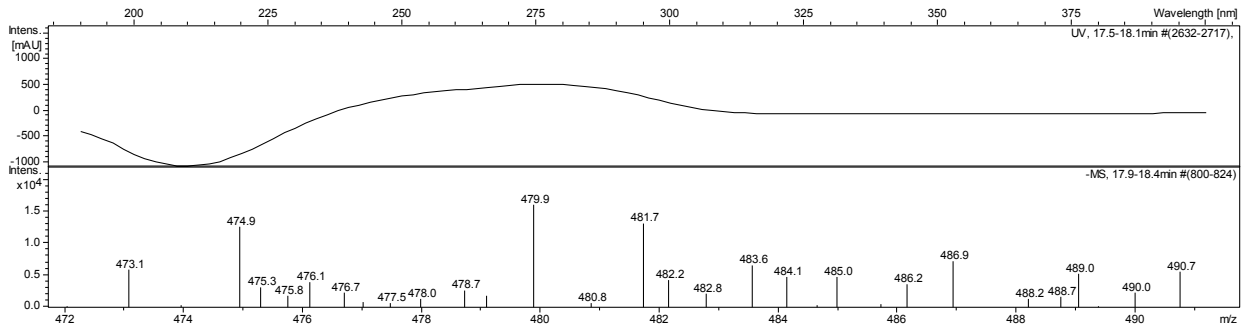



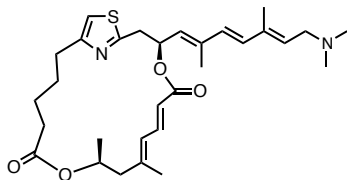

LC/MS of 8

Chemical Formula:  $C_{30}H_{42}N_2O_4S$   
 Exact Mass: 526.2865  
 Molecular Weight: 526.7305

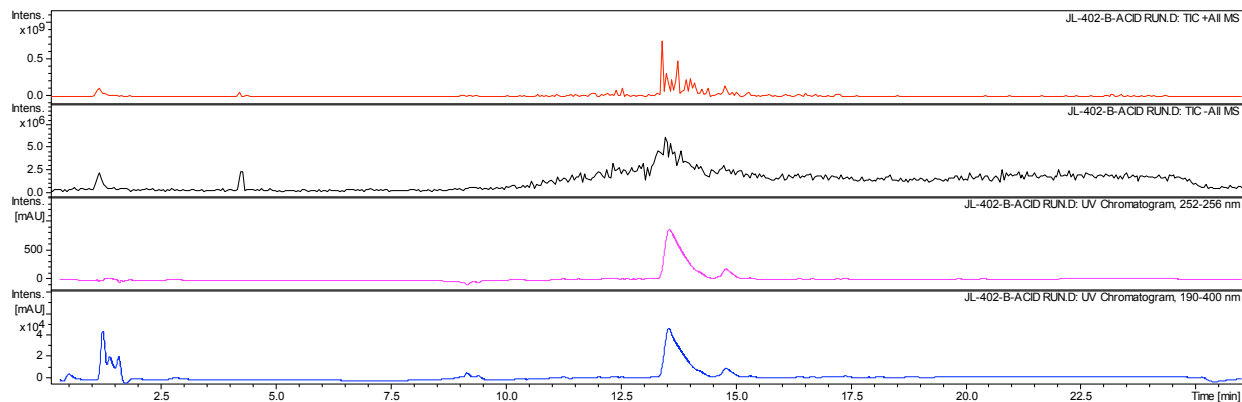

Major peaks (+ mode):

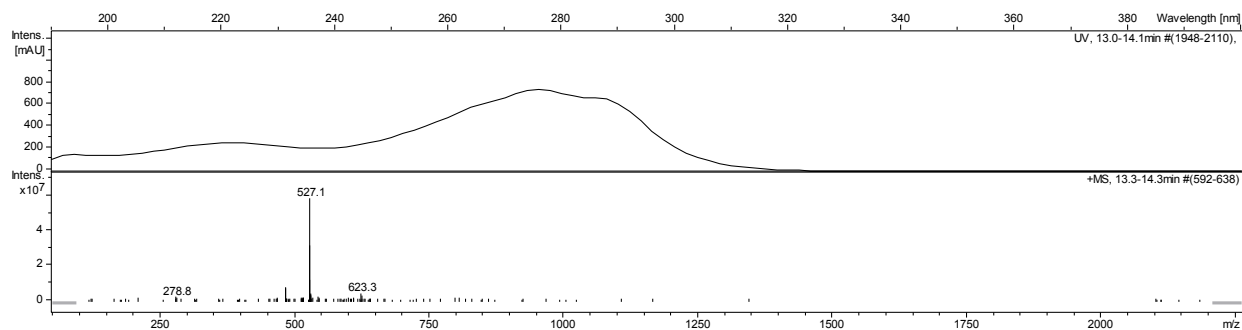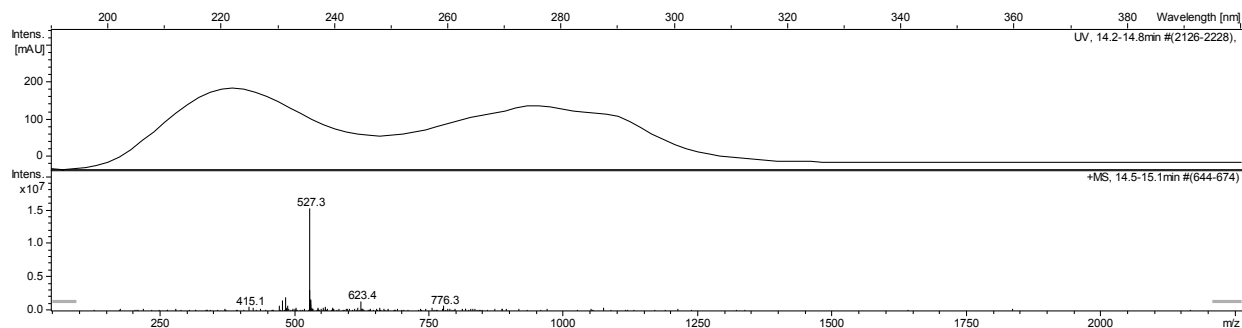

Major peaks (- mode):

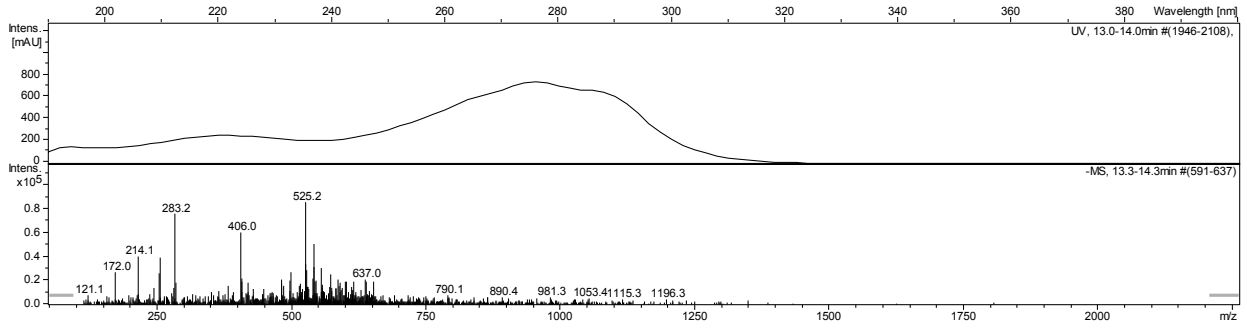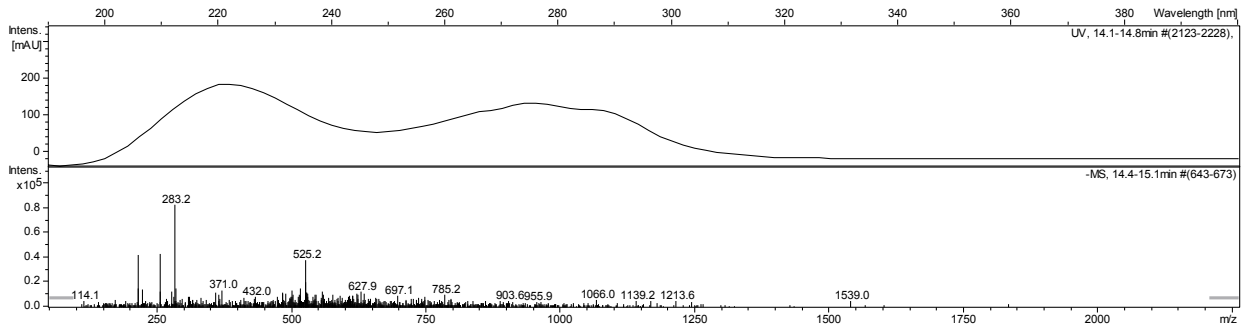

# LC/MS of 9b

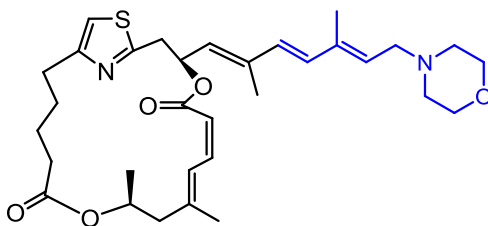

Chemical Formula:  $C_{32}H_{44}N_2O_5S$   
Molecular Weight: 568.7672

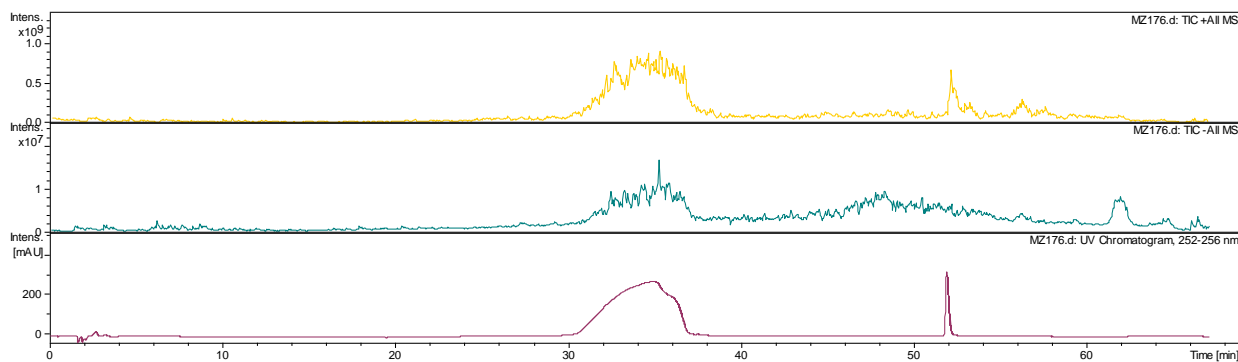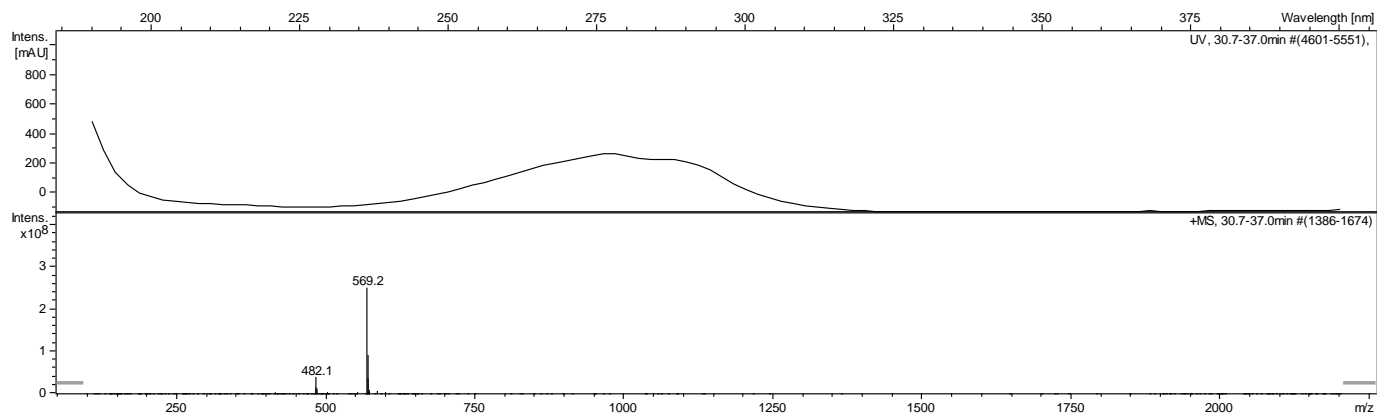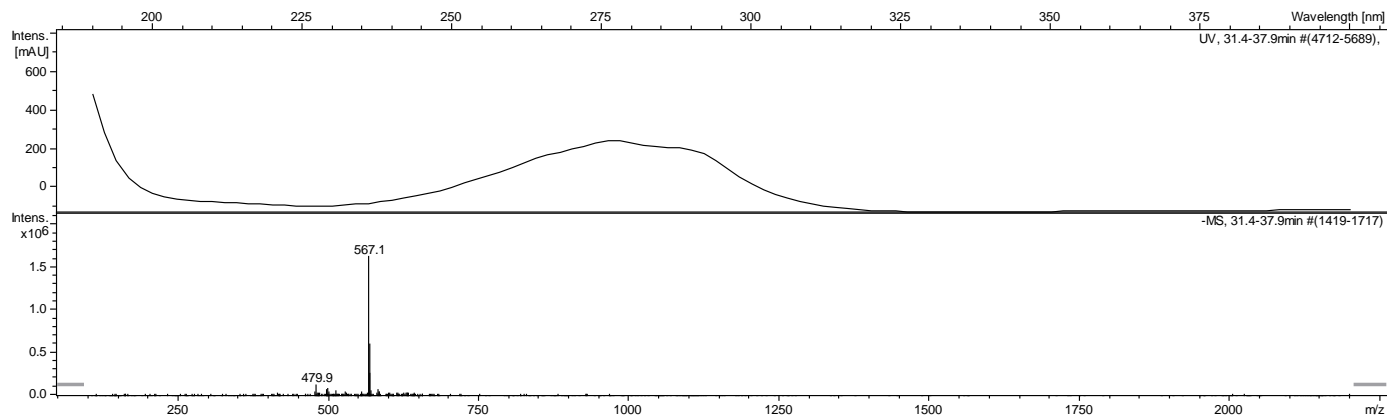

# LC/MS of 9c

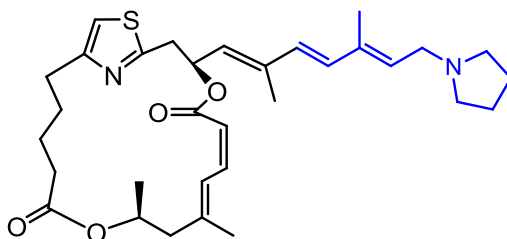

Chemical Formula:  $C_{32}H_{44}N_2O_4S$   
 Molecular Weight: 552.7678

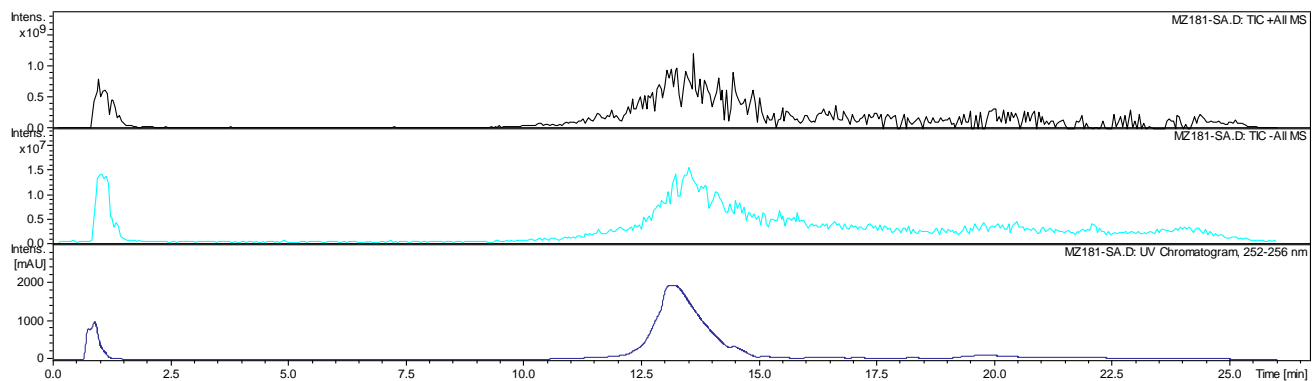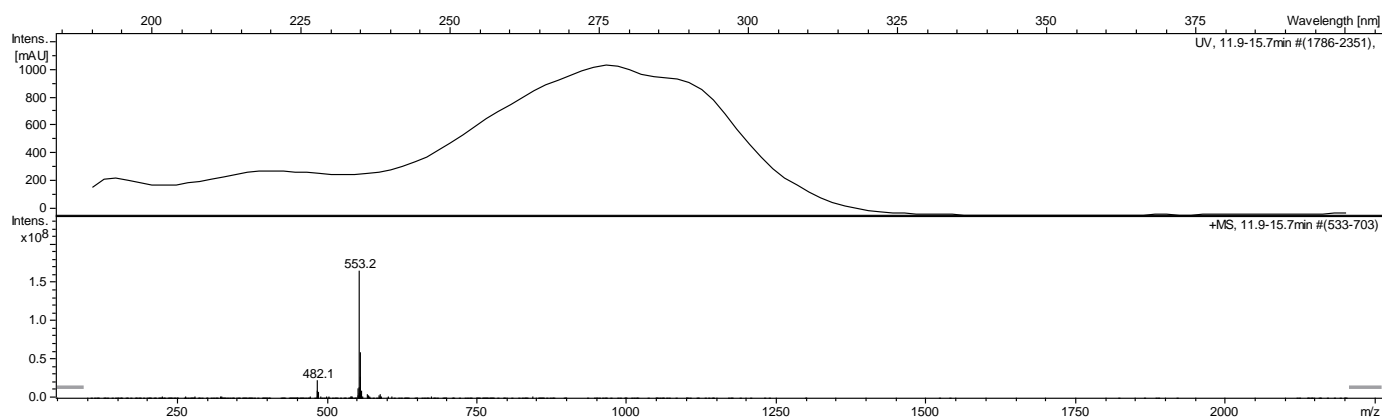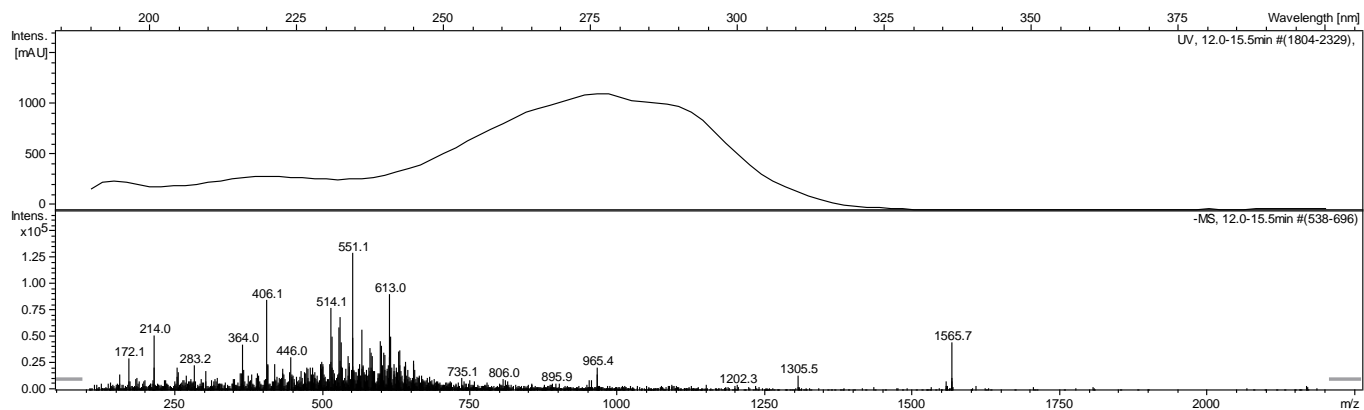

# LC/MS of 9d

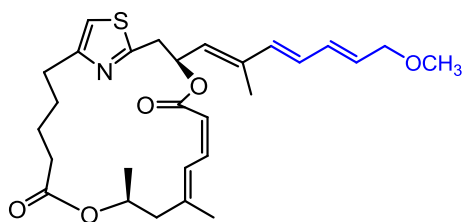

Chemical Formula: C<sub>28</sub>H<sub>37</sub>NO<sub>5</sub>S  
Molecular Weight: 499.6621

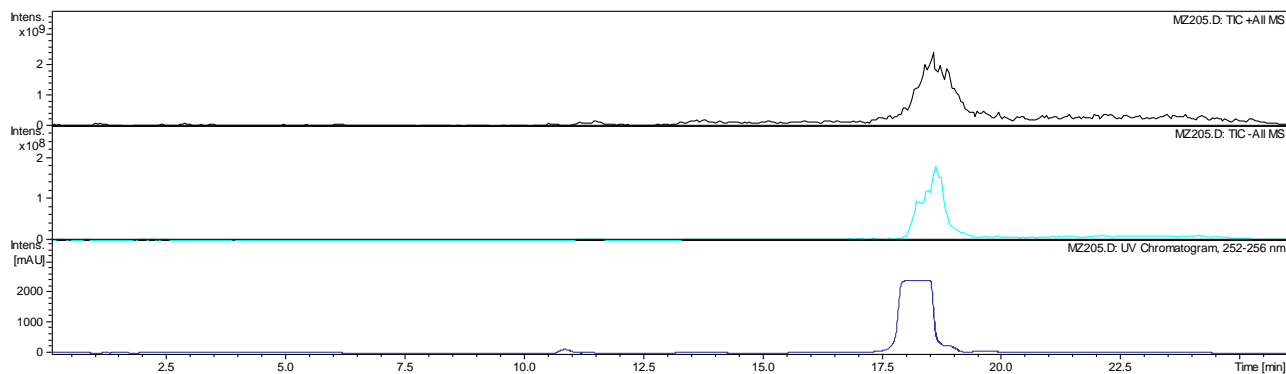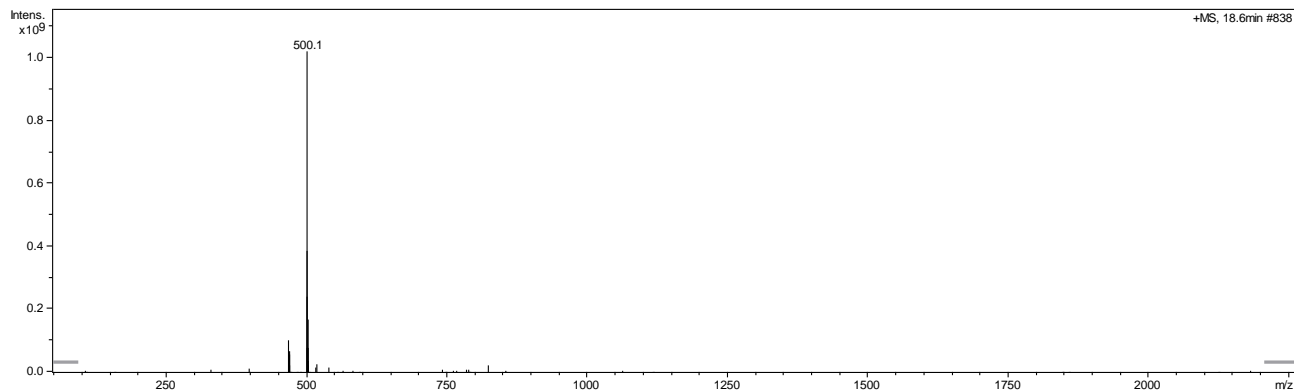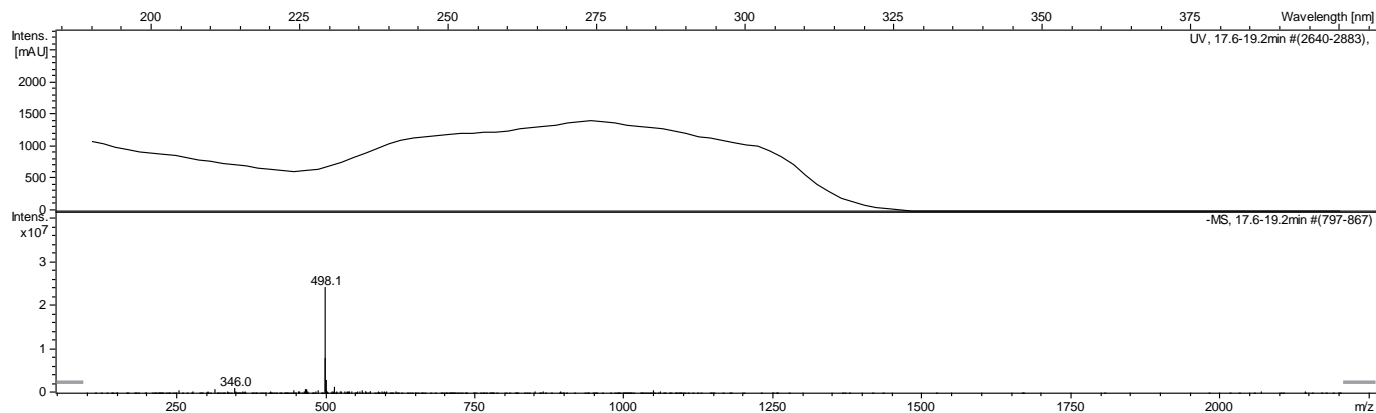

# LC/MS of 9e

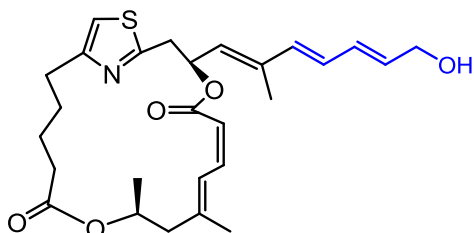

Chemical Formula:  $C_{27}H_{35}NO_5S$   
Molecular Weight: 485.6355

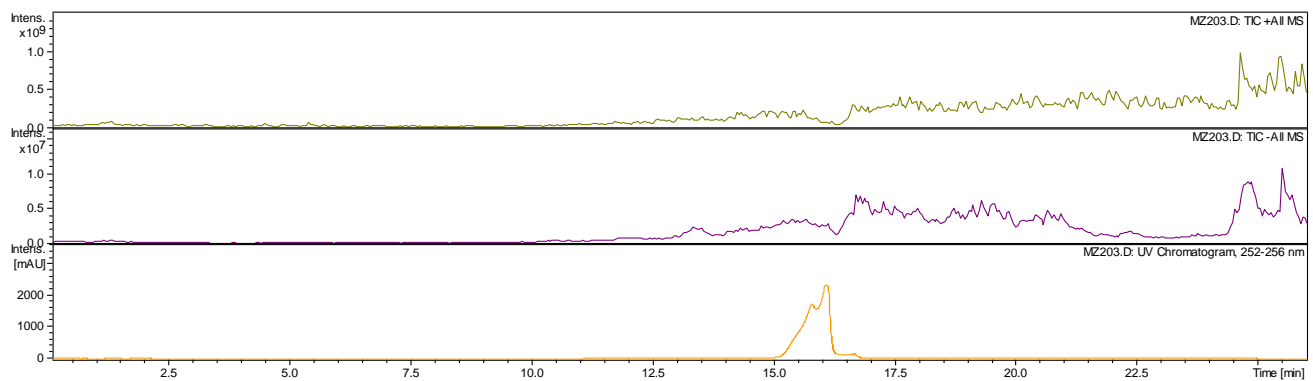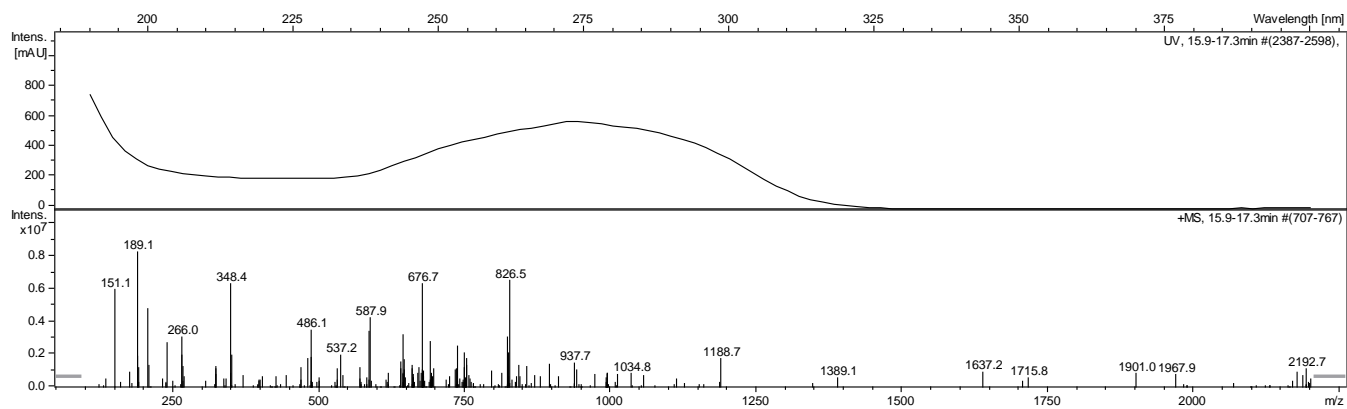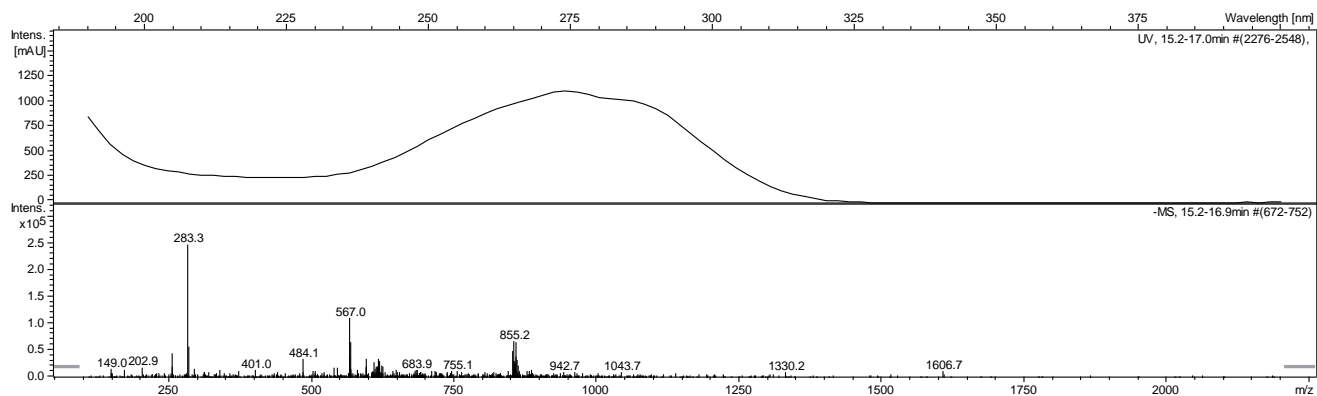

# LC/MS of 9f

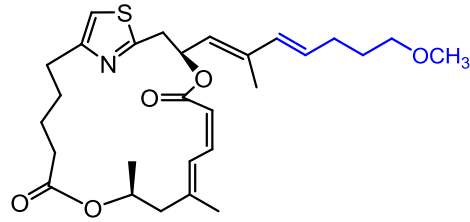

Chemical Formula: C<sub>26</sub>H<sub>39</sub>NO<sub>5</sub>S  
Molecular Weight: 501.6780

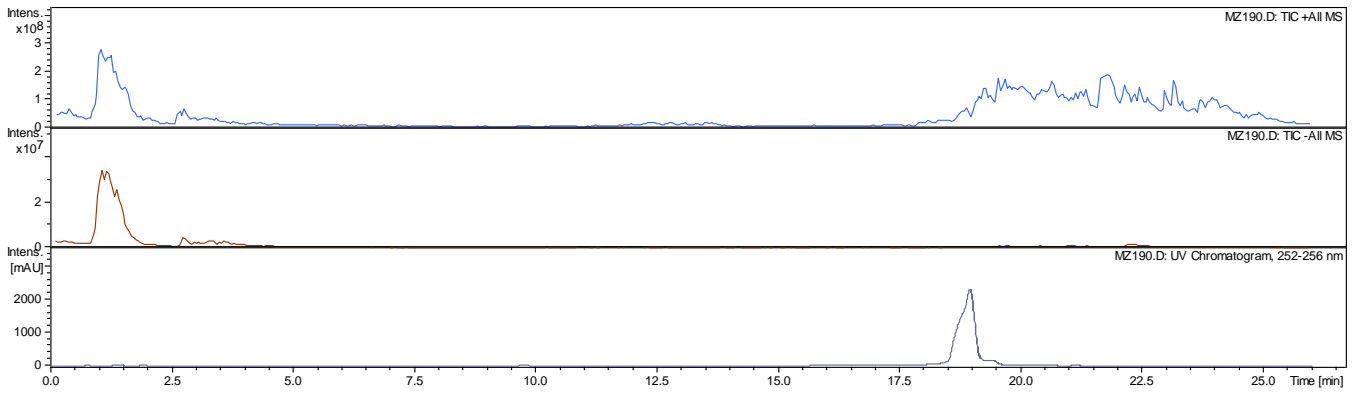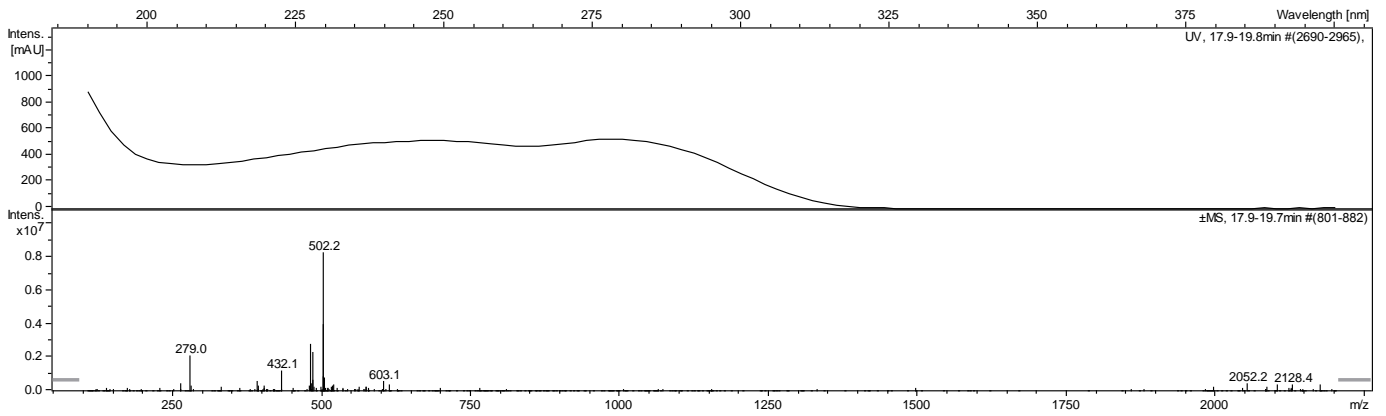

# LC/MS of 9g

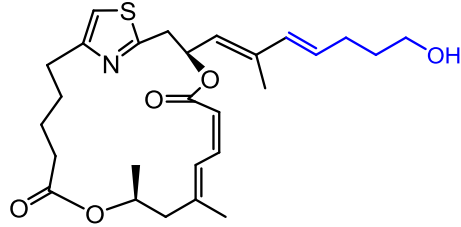

Chemical Formula:  $C_{27}H_{37}NO_5S$   
Molecular Weight: 487.6514

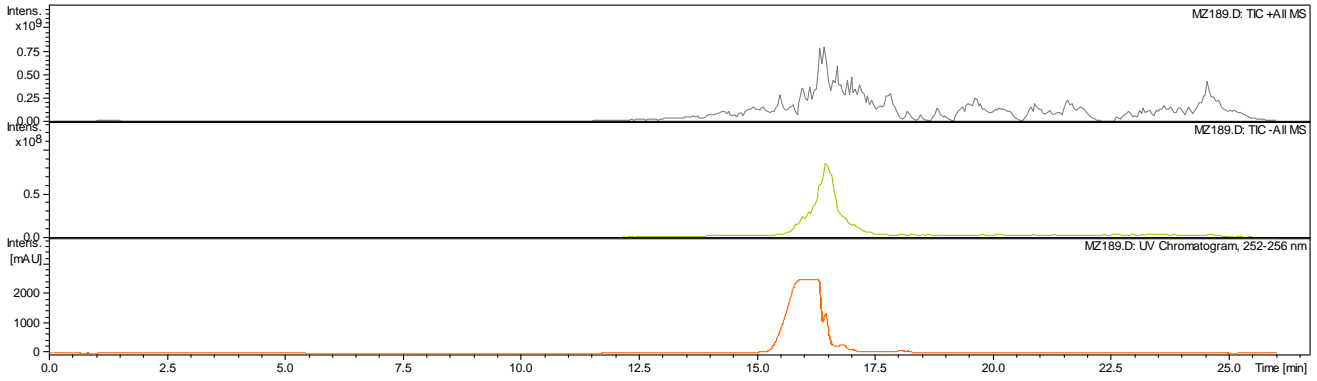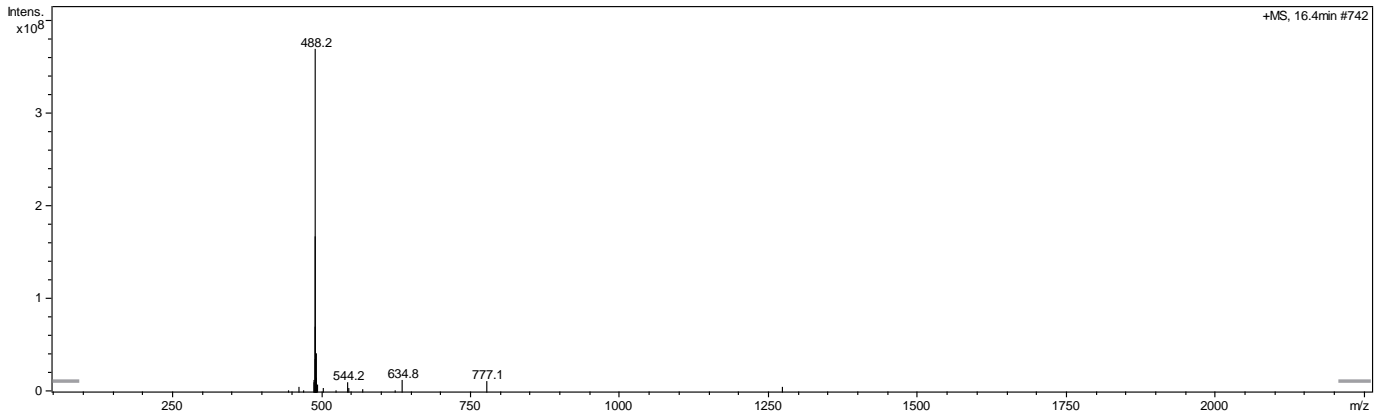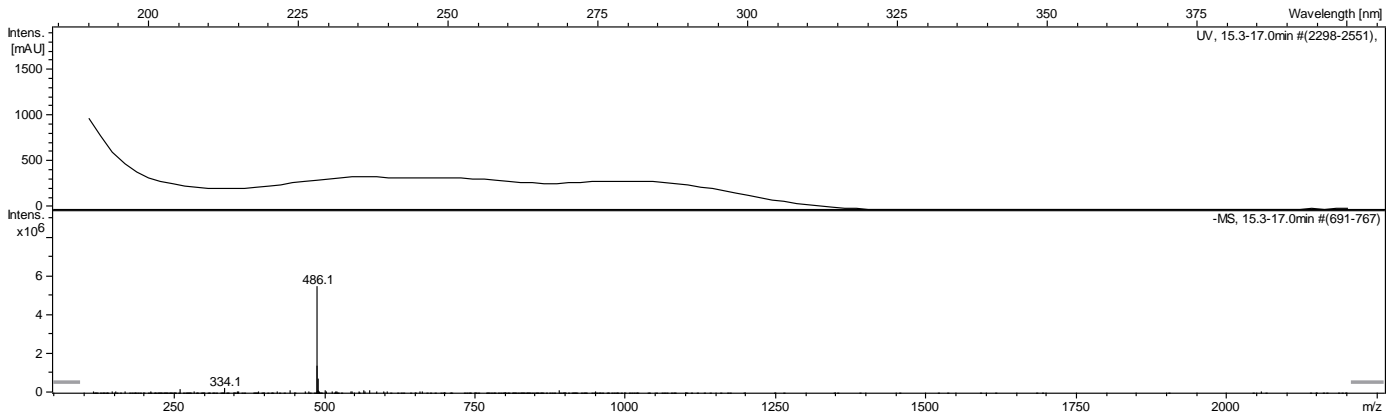



# LC/MS of 10a

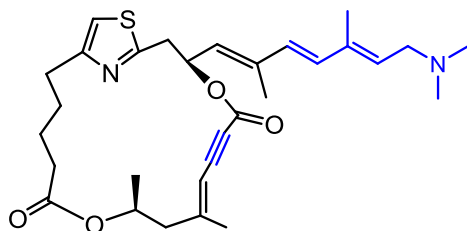

Chemical Formula: C<sub>30</sub>H<sub>40</sub>N<sub>2</sub>O<sub>4</sub>S  
Molecular Weight: 524.7146

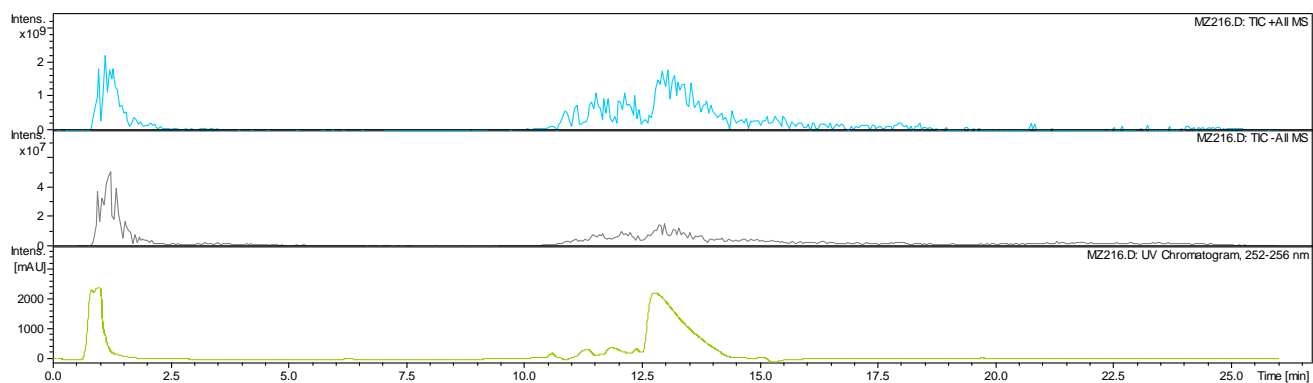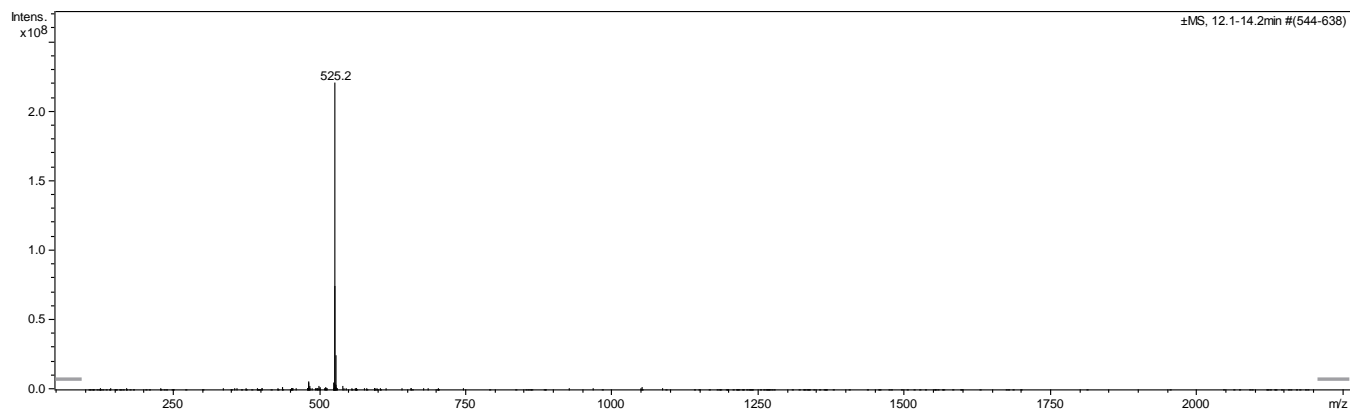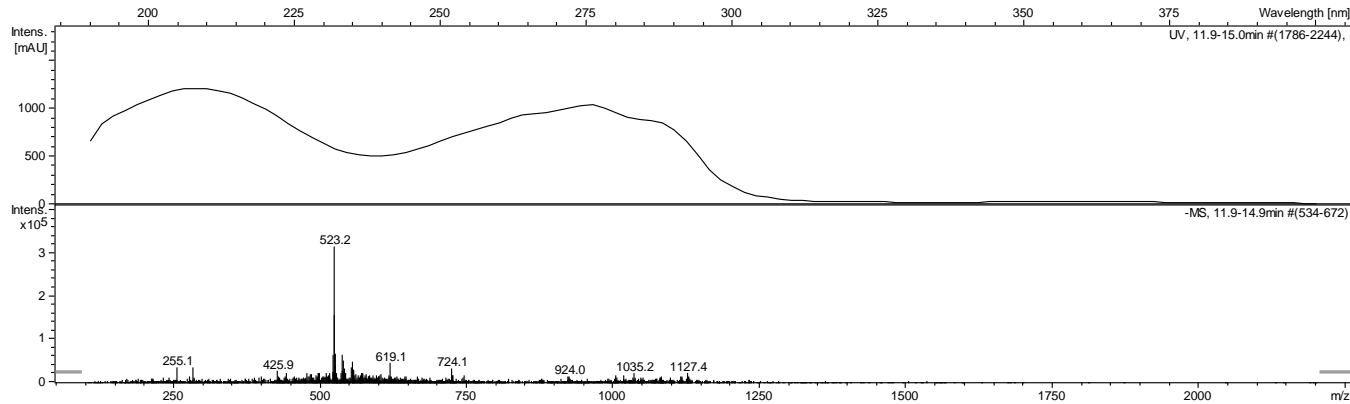

# LC/MS of 10b

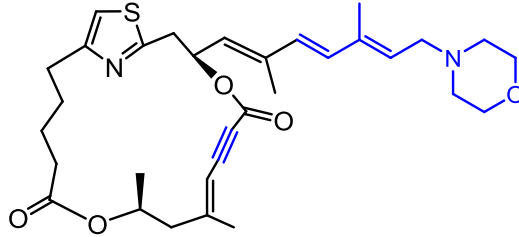

Chemical Formula:  $C_{32}H_{42}N_2O_5S$   
Molecular Weight: 566.7513

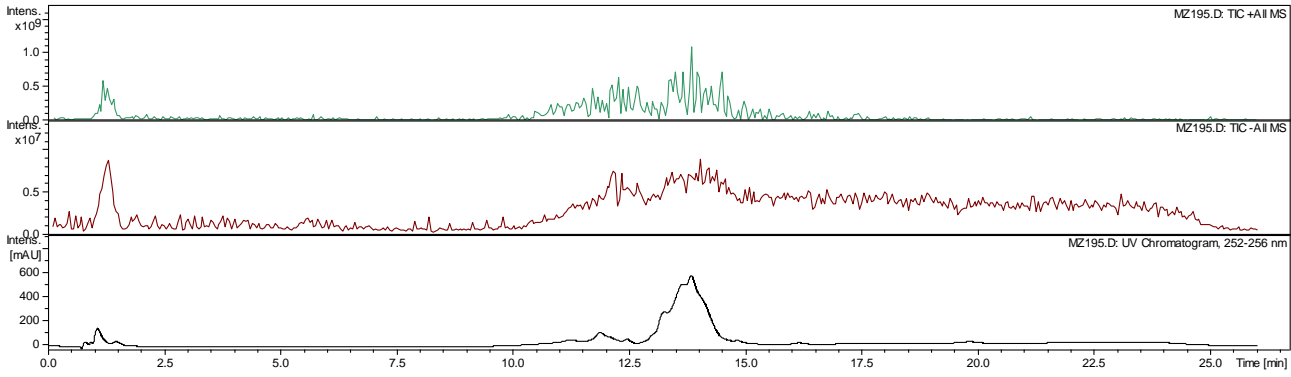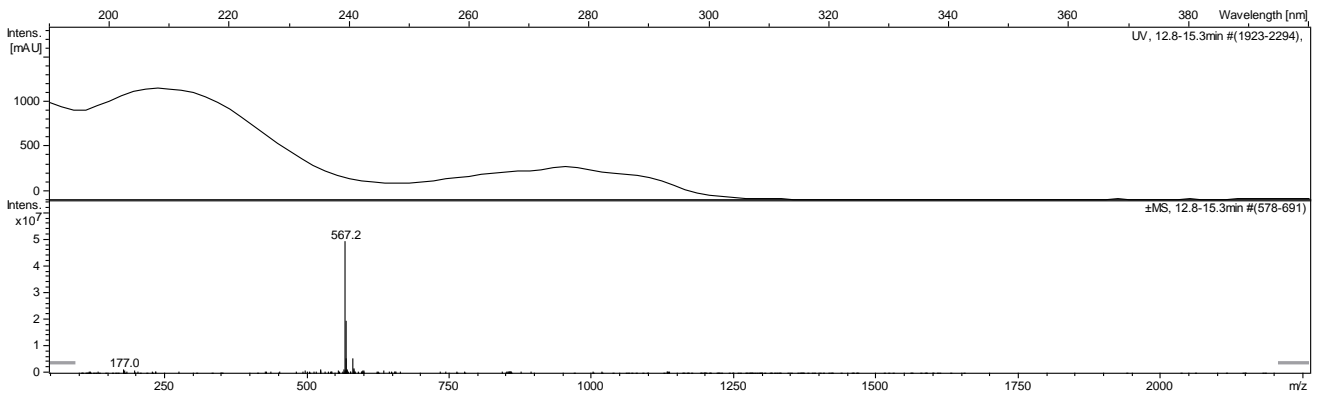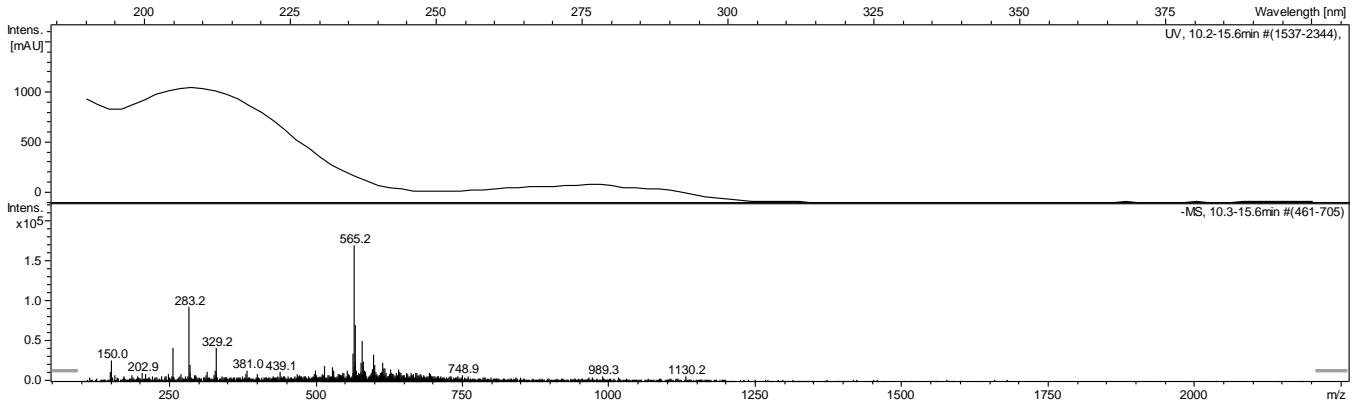

LC/MS of **10c**

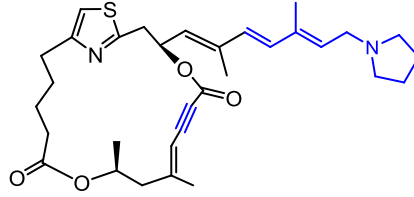

Chemical Formula: C<sub>32</sub>H<sub>42</sub>N<sub>2</sub>O<sub>4</sub>S  
Molecular Weight: 550.7519

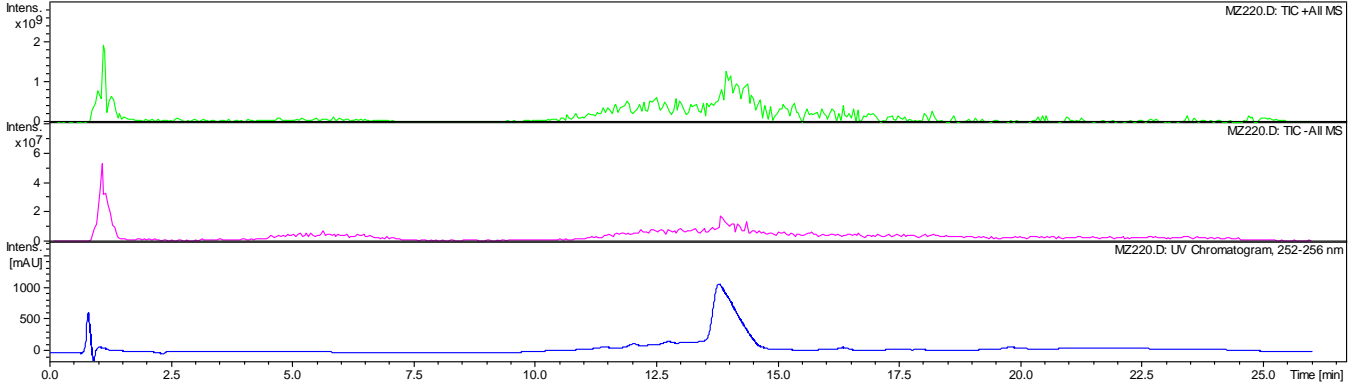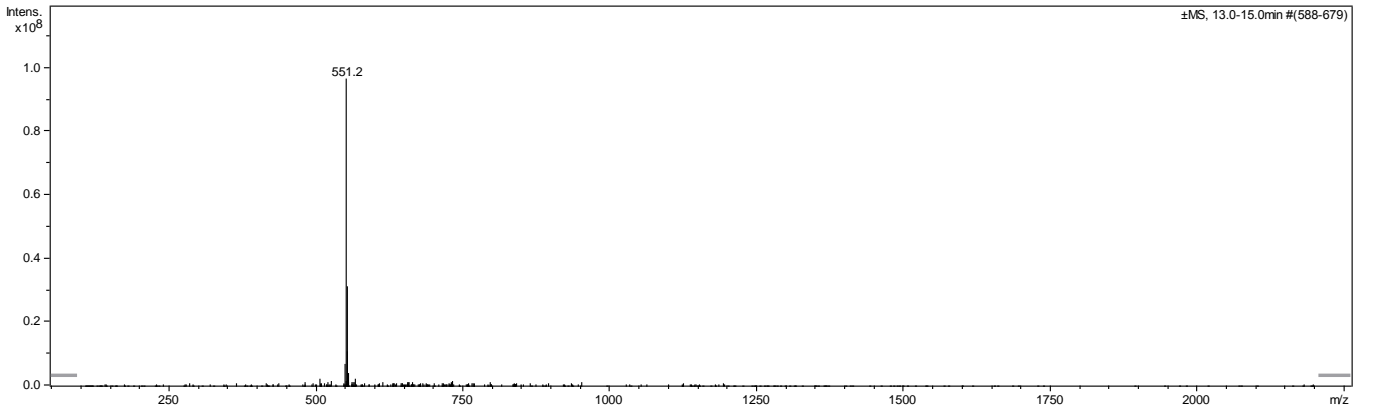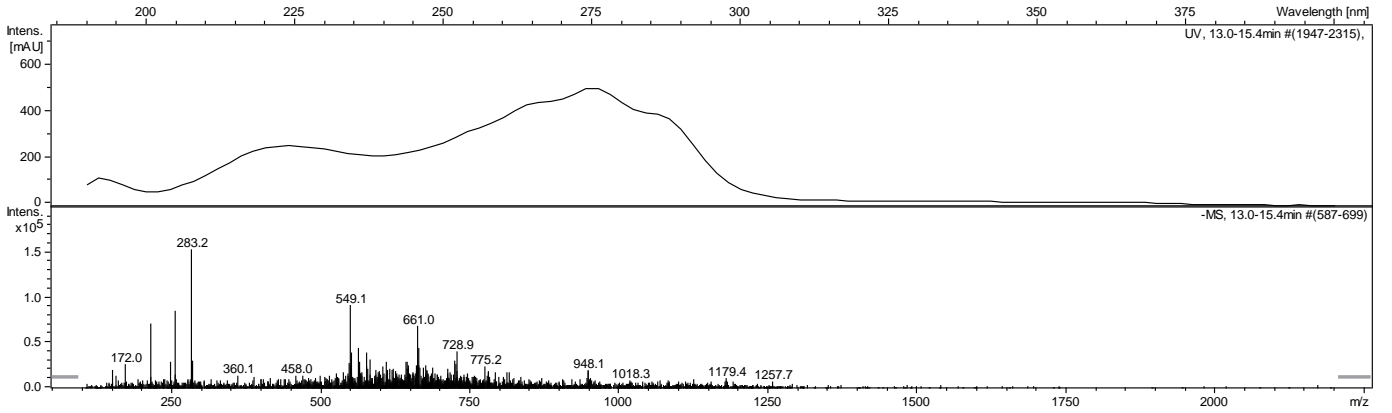

# LC/MS of 10d

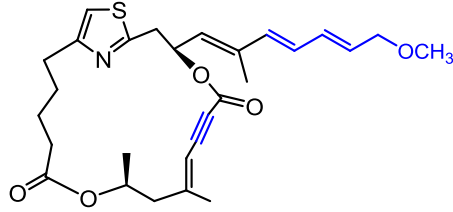

Chemical Formula:  $C_{28}H_{35}NO_5S$   
Molecular Weight: 497.6462

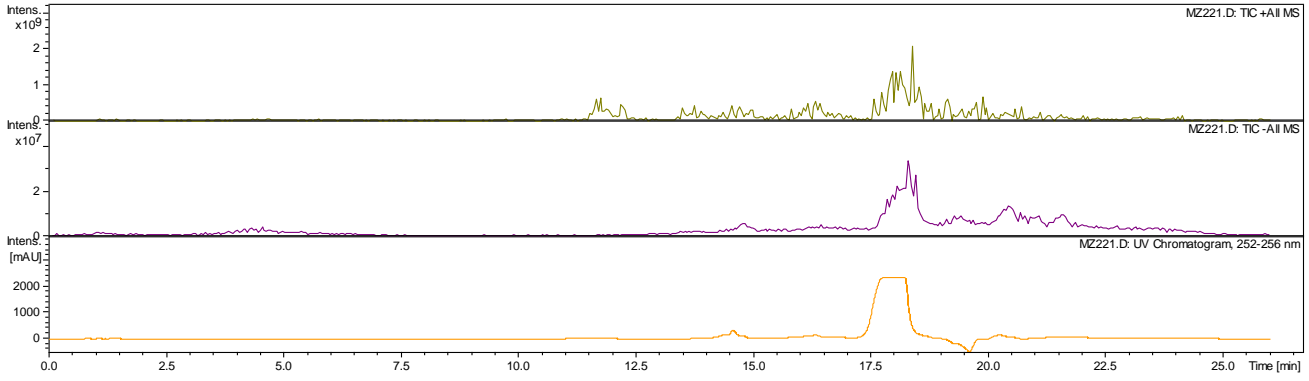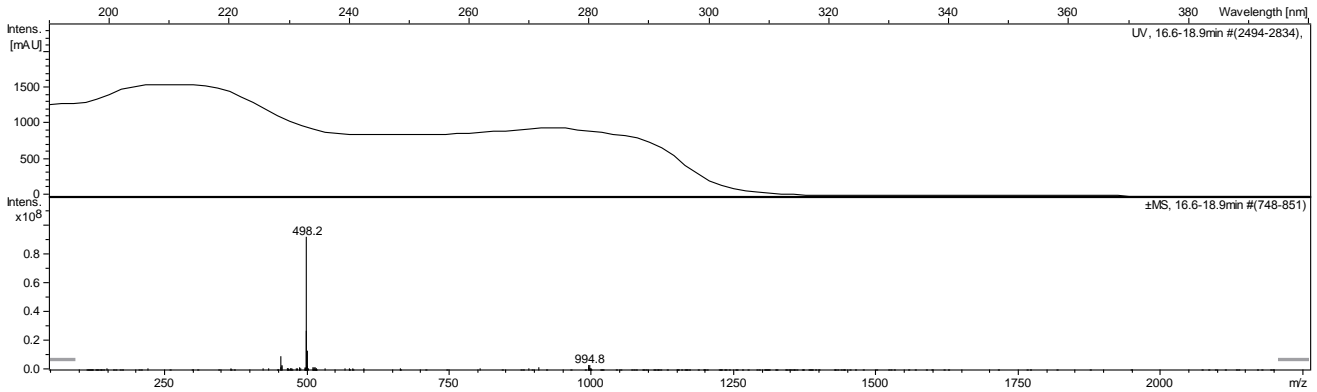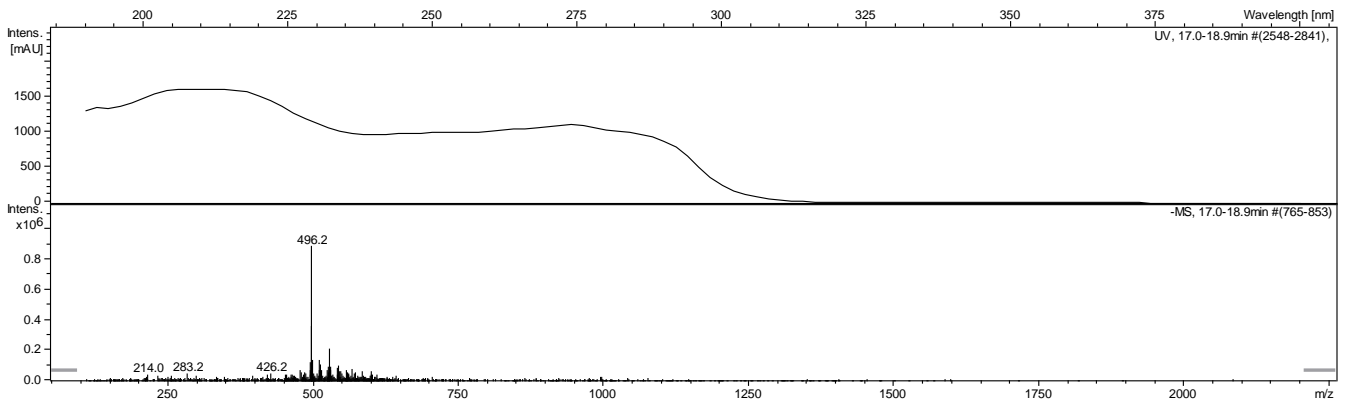

# LC/MS of 10e

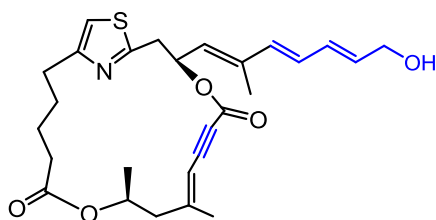

Chemical Formula: C<sub>27</sub>H<sub>33</sub>NO<sub>5</sub>S  
Molecular Weight: 483.6196

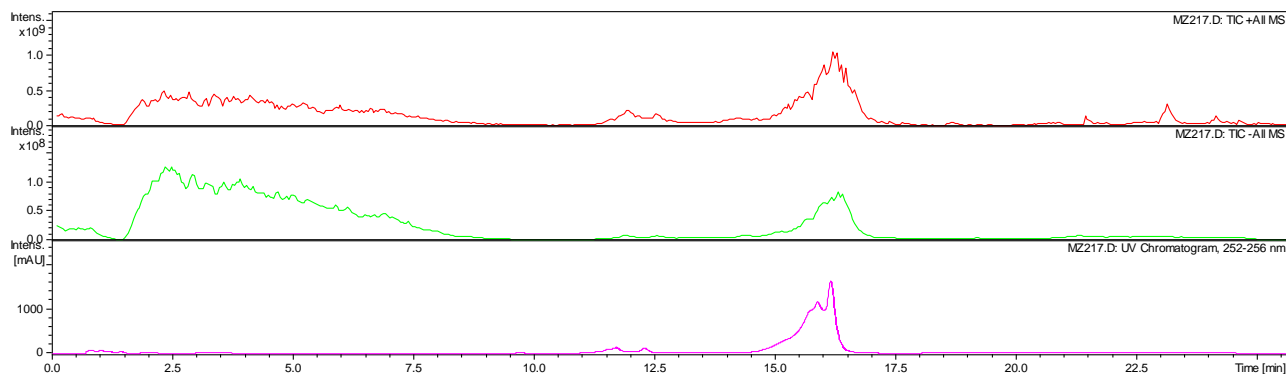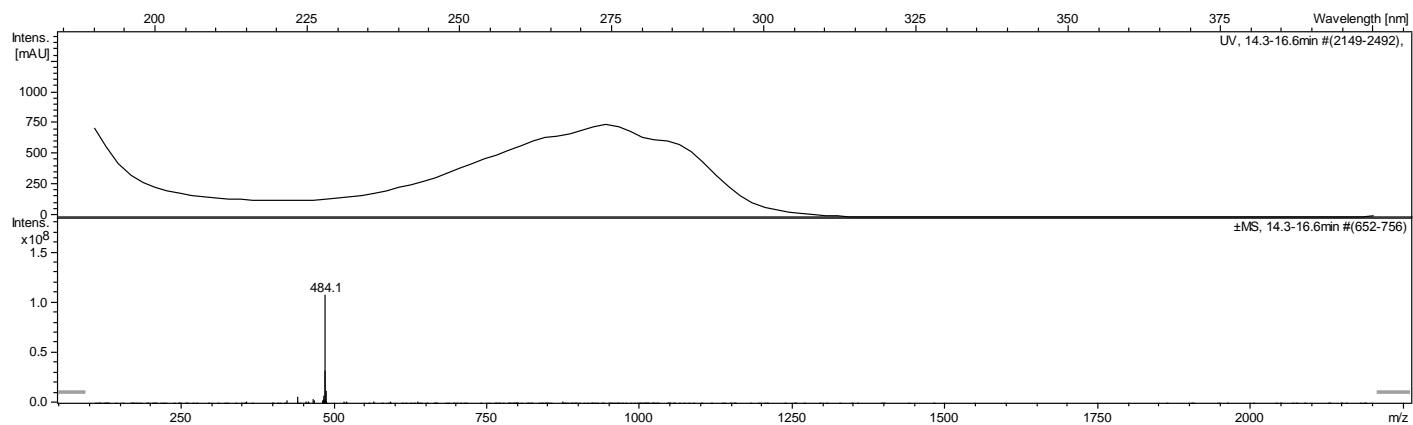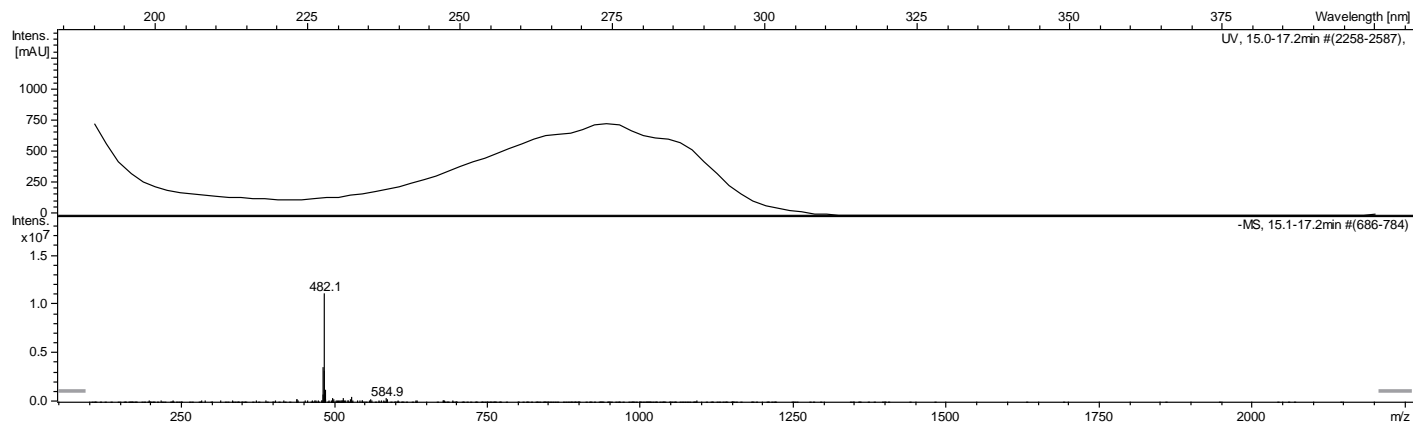

# LC/MS of 10f

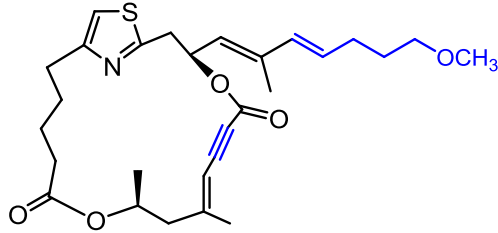

Chemical Formula:  $C_{28}H_{37}NO_5S$   
Molecular Weight: 499.6621

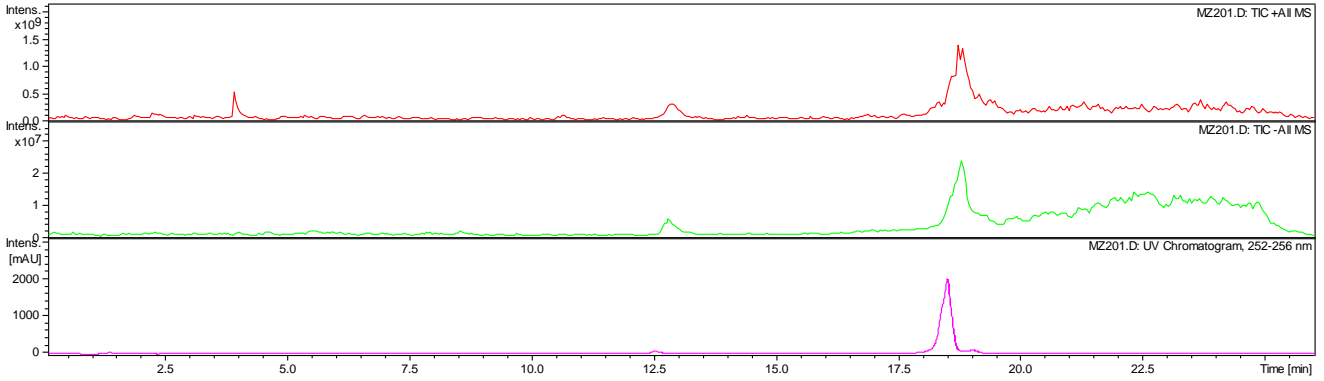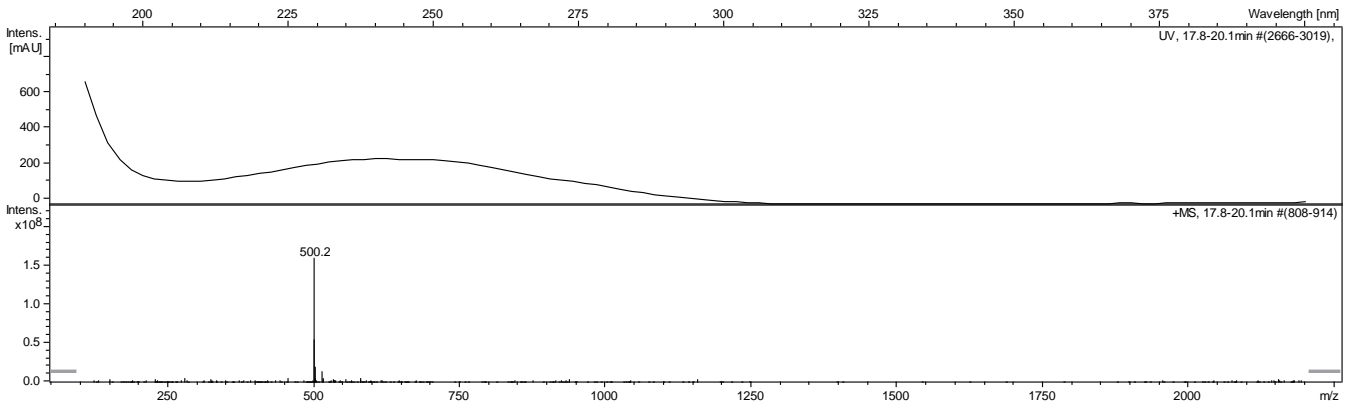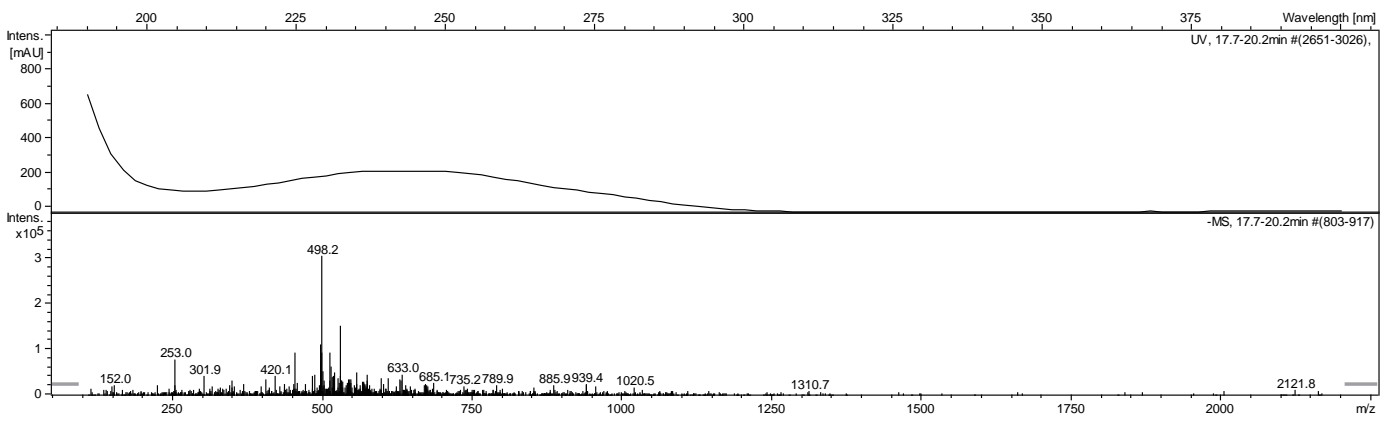

# LC/MS of 10g

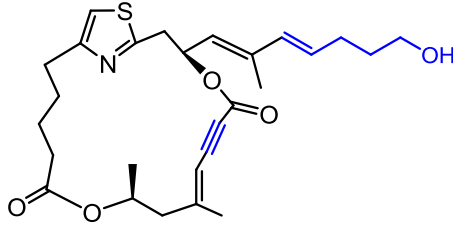

Chemical Formula:  $C_{27}H_{35}NO_5S$   
Molecular Weight: 485.6355

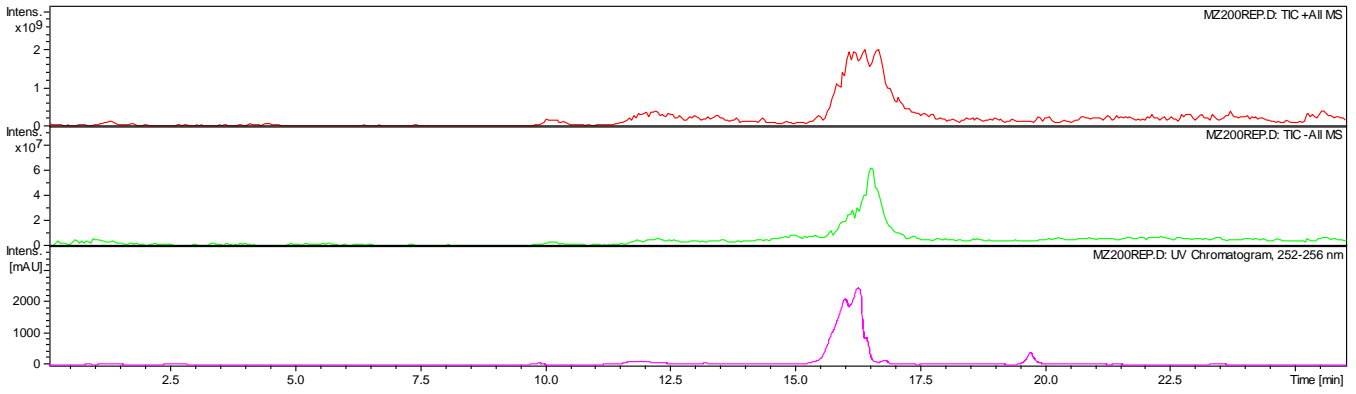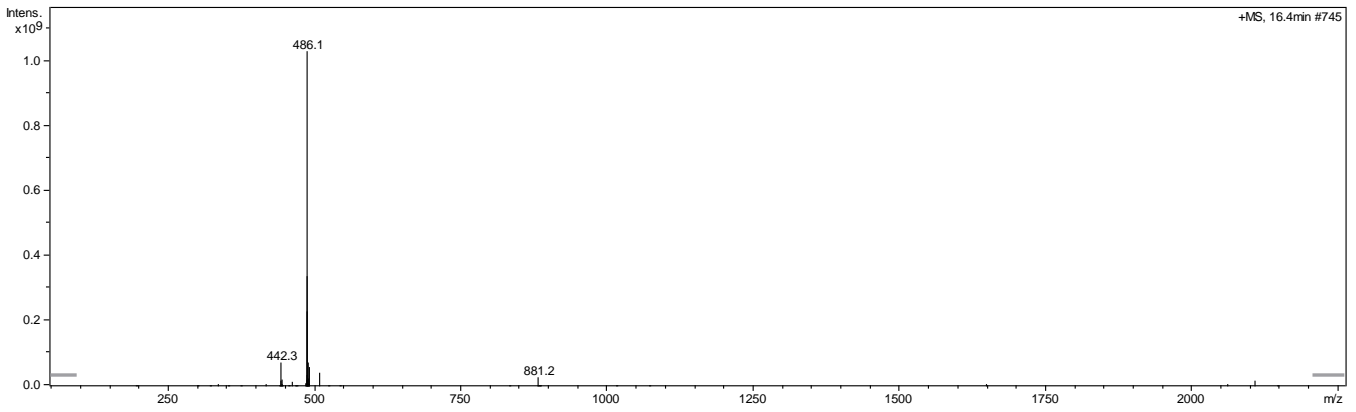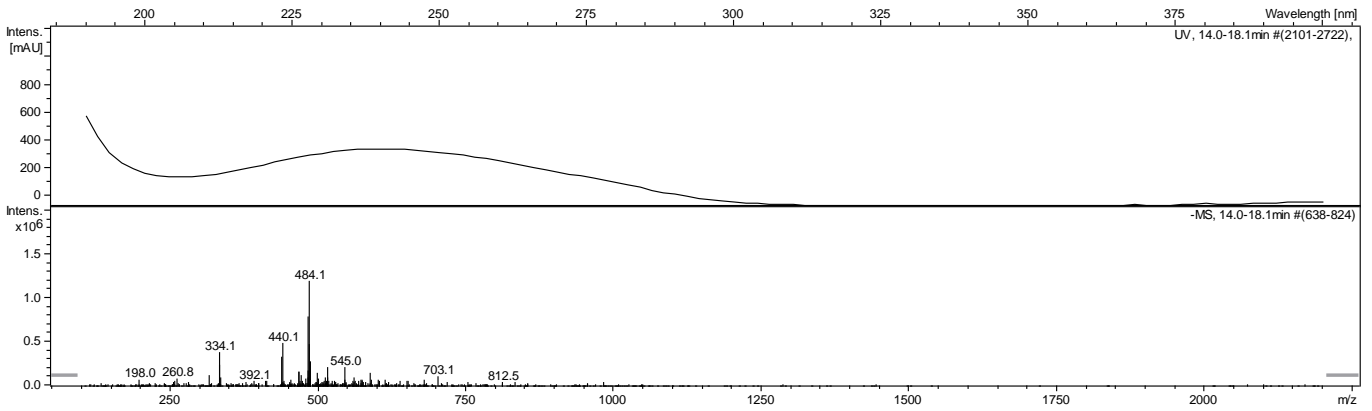

Pulse Sequence: s2pul

Solvent: cdcl3  
Ambient temperature  
Operator: jingli  
File: JL-321-Arun3-1  
INOVA-500 "nmrsun1"

Relax. delay 1.000 sec  
Pulse 45.0 degrees  
Acq. time 2.049 sec  
Width 7990.4 Hz  
256 repetitions  
OBSERVE H1, 499.7251539 MHz  
DATA PROCESSING  
Resol. enhancement -0.0 Hz  
FT size 65536  
Total time 13 min, 9 sec

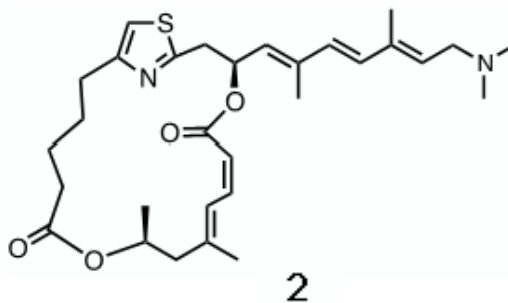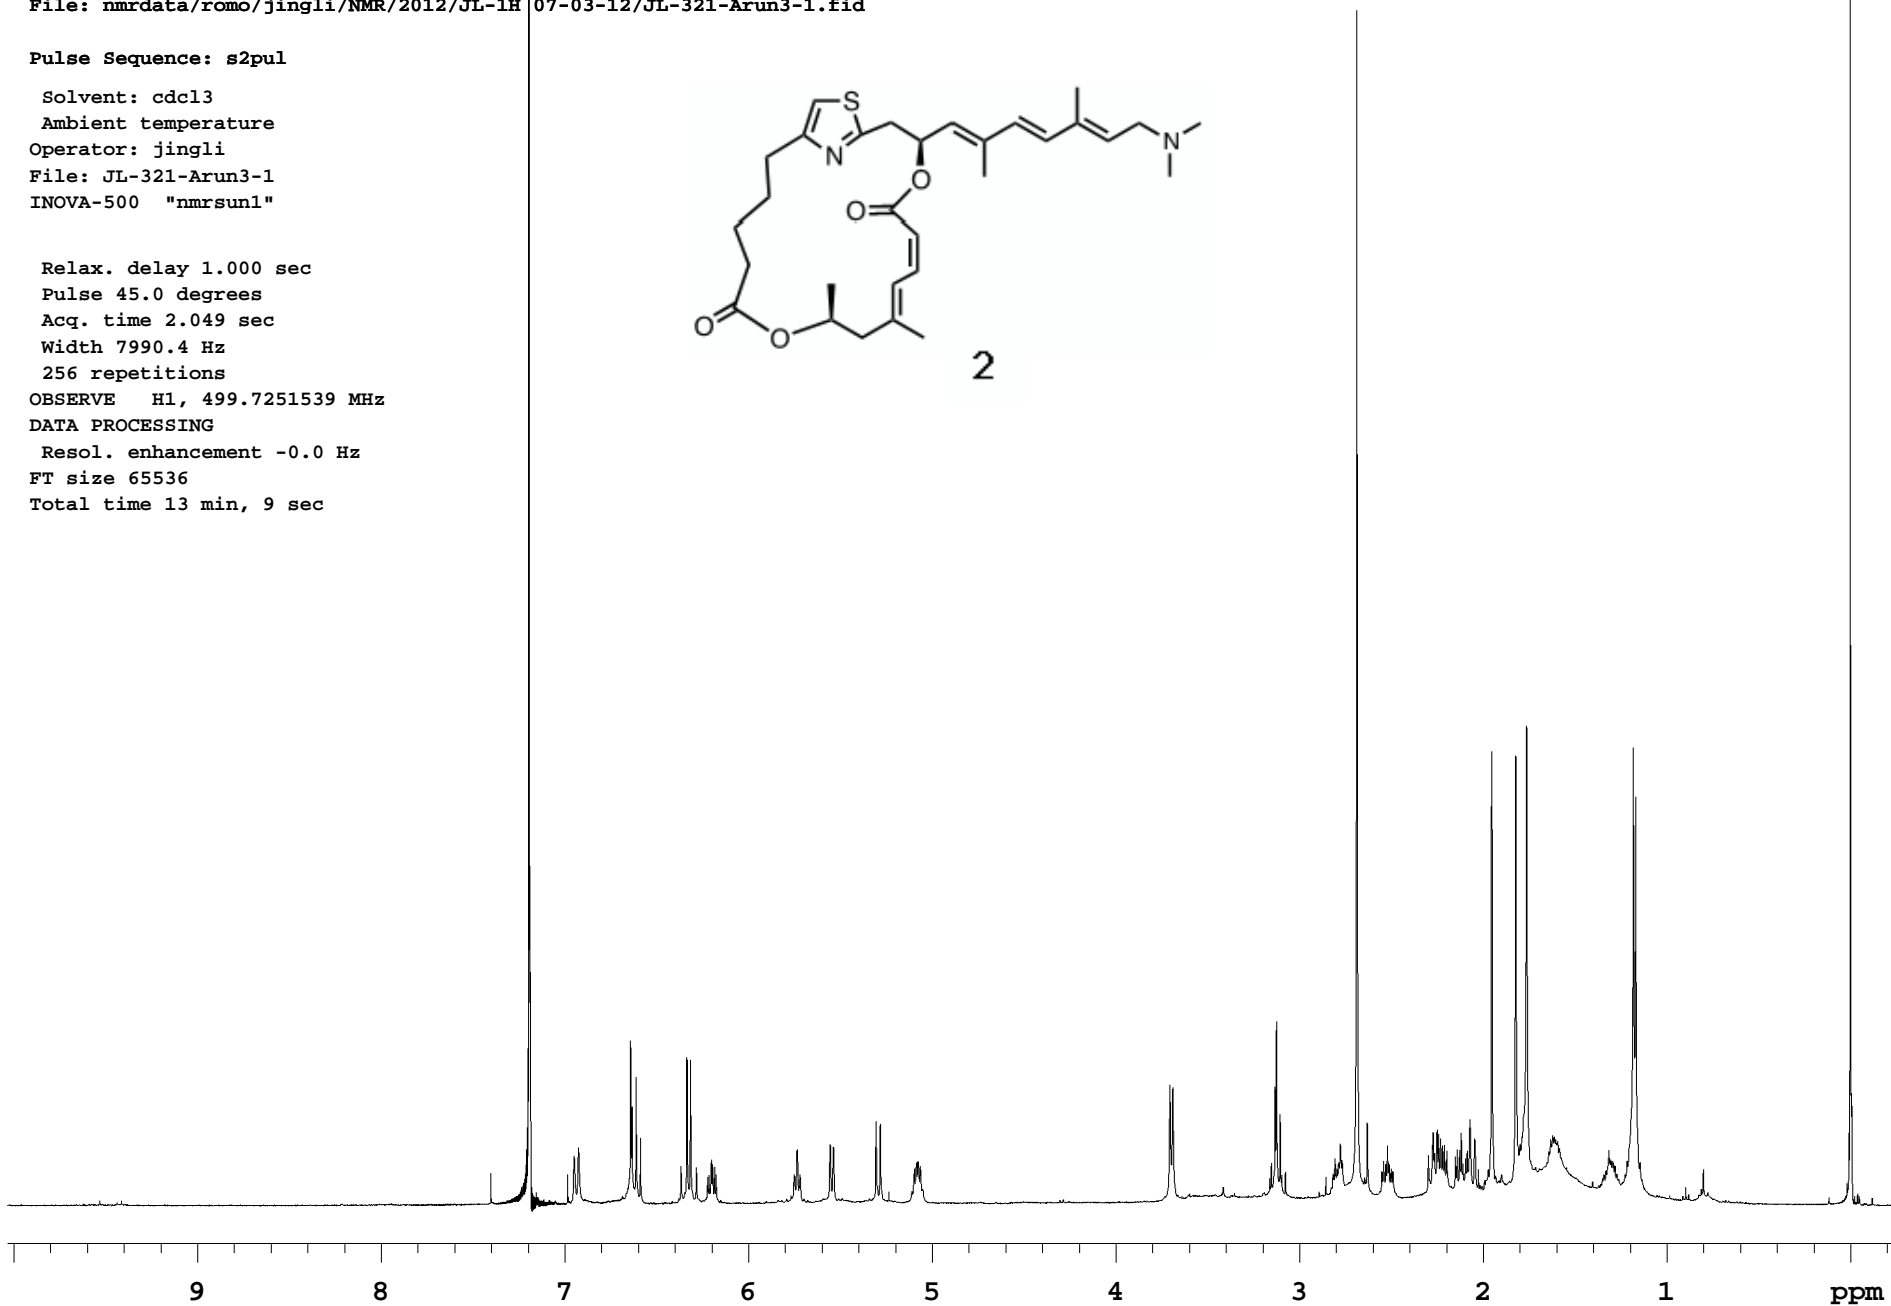



File: nmrdata/romo/jingli/NMR/2012/JL-13C 07-03-12/JL-321-A-48h-2.fid

Pulse Sequence: s2pul

Solvent: c6d6  
Ambient temperature  
Operator: jingli  
File: JL-321-A-48h-2  
INOVA-500 "nmrsun1"

Relax. delay 1.000 sec  
Pulse 45.0 degrees  
Acq. time 1.300 sec  
Width 32894.7 Hz  
73552 repetitions  
OBSERVE C13, 125.6846988 MHz  
DECOUPLE H1, 499.8423058 MHz  
Power 49 dB  
continuously on  
WALTZ-16 modulated  
DATA PROCESSING  
Resol. enhancement -0.0 Hz  
FT size 131072  
Total time 51 hr, 19 min, 13 sec

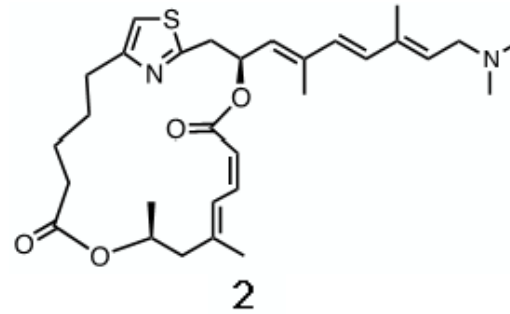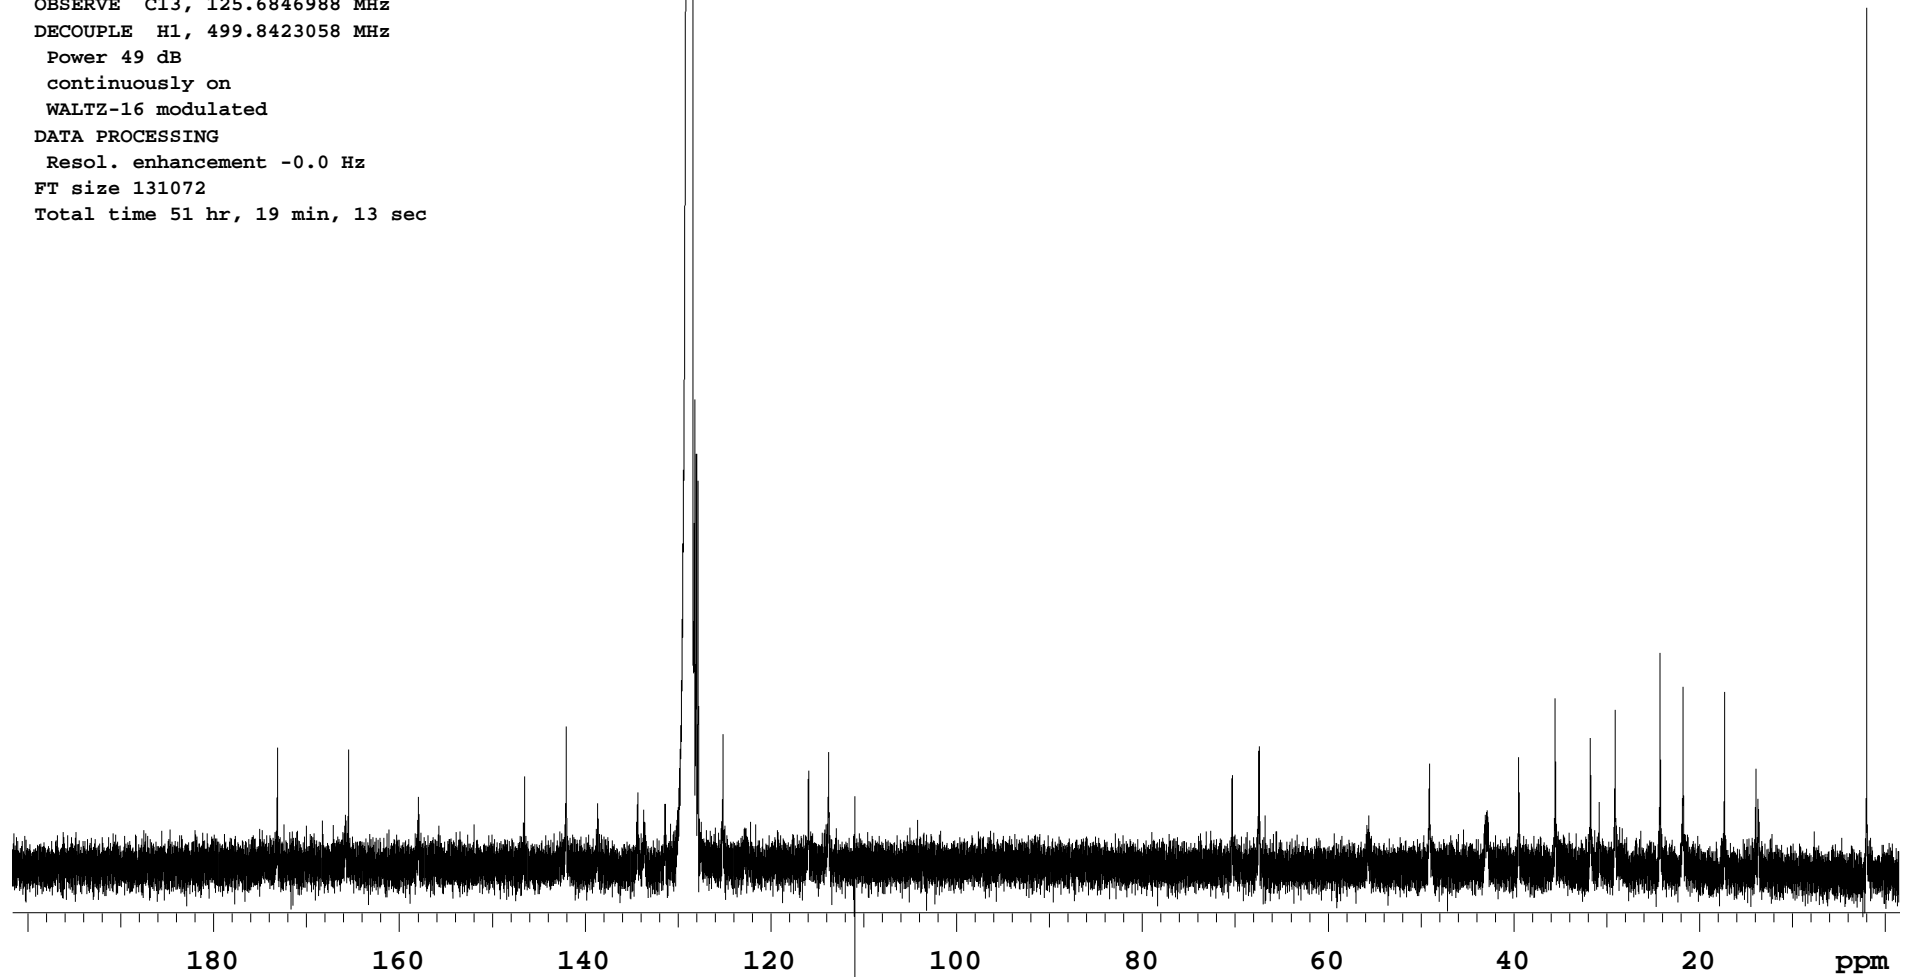

MZ215

Sample: MZ215

File: home/romo/mzhu/vnmrsys/data/MZ215.fid

Pulse Sequence: s2pul

Solvent: cdc13

Ambient temperature

Operator: mzhu

File: MZ215

INOVA-500 "nmrsun1"

Relax. delay 1.000 sec

Pulse 45.0 degrees

Acq. time 2.049 sec

Width 7995.2 Hz

16 repetitions

OBSERVE H1, 499.4254488 MHz

DATA PROCESSING

Resol. enhancement -0.0 Hz

FT size 65536

Total time 0 min, 55 sec

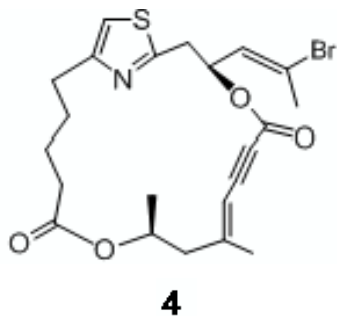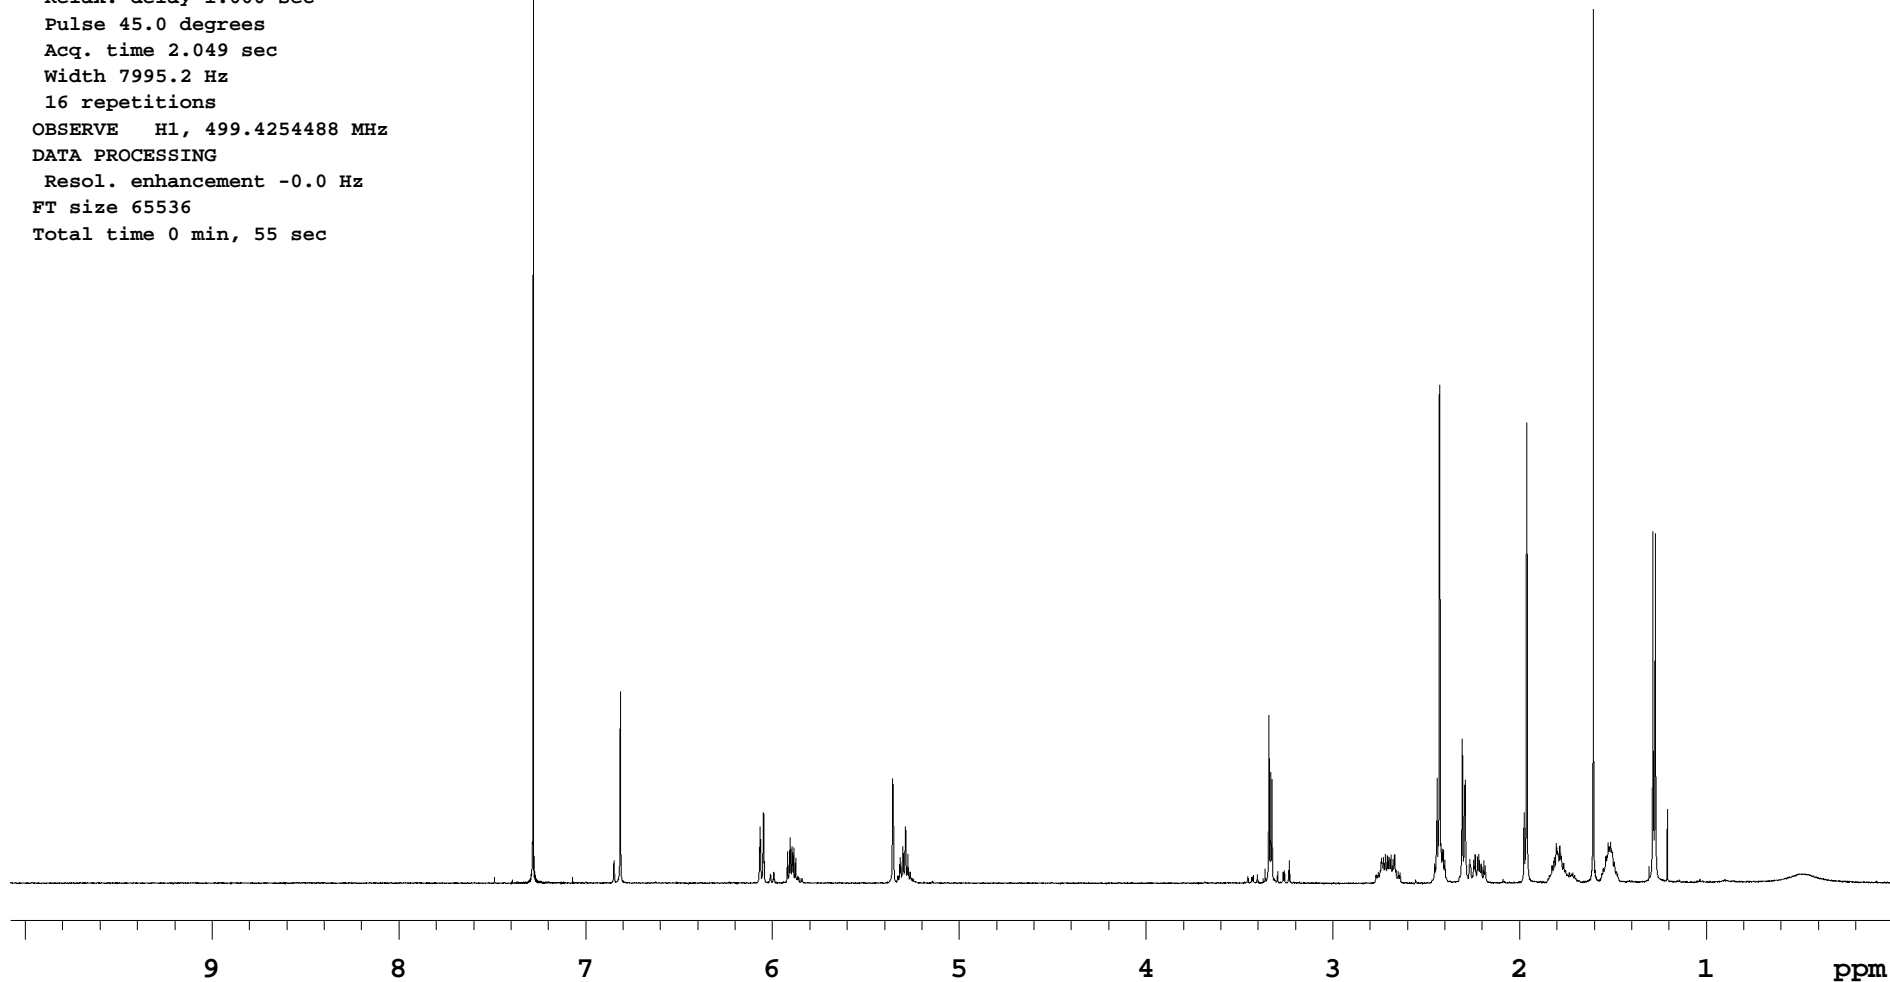

Pulse Sequence: s2pul

Solvent: cdcl3  
Ambient temperature  
Operator: jingli  
File: JL-365-A-1  
INOVA-500 "nmrsun1"

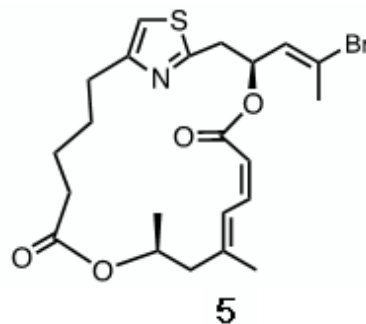

Relax. delay 1.000 sec  
Pulse 45.0 degrees  
Acq. time 2.049 sec  
Width 7996.0 Hz  
32 repetitions  
OBSERVE H1, 499.4254488 MHz  
DATA PROCESSING  
Resol. enhancement -0.0 Hz  
FT size 65536  
Total time 1 min, 44 sec

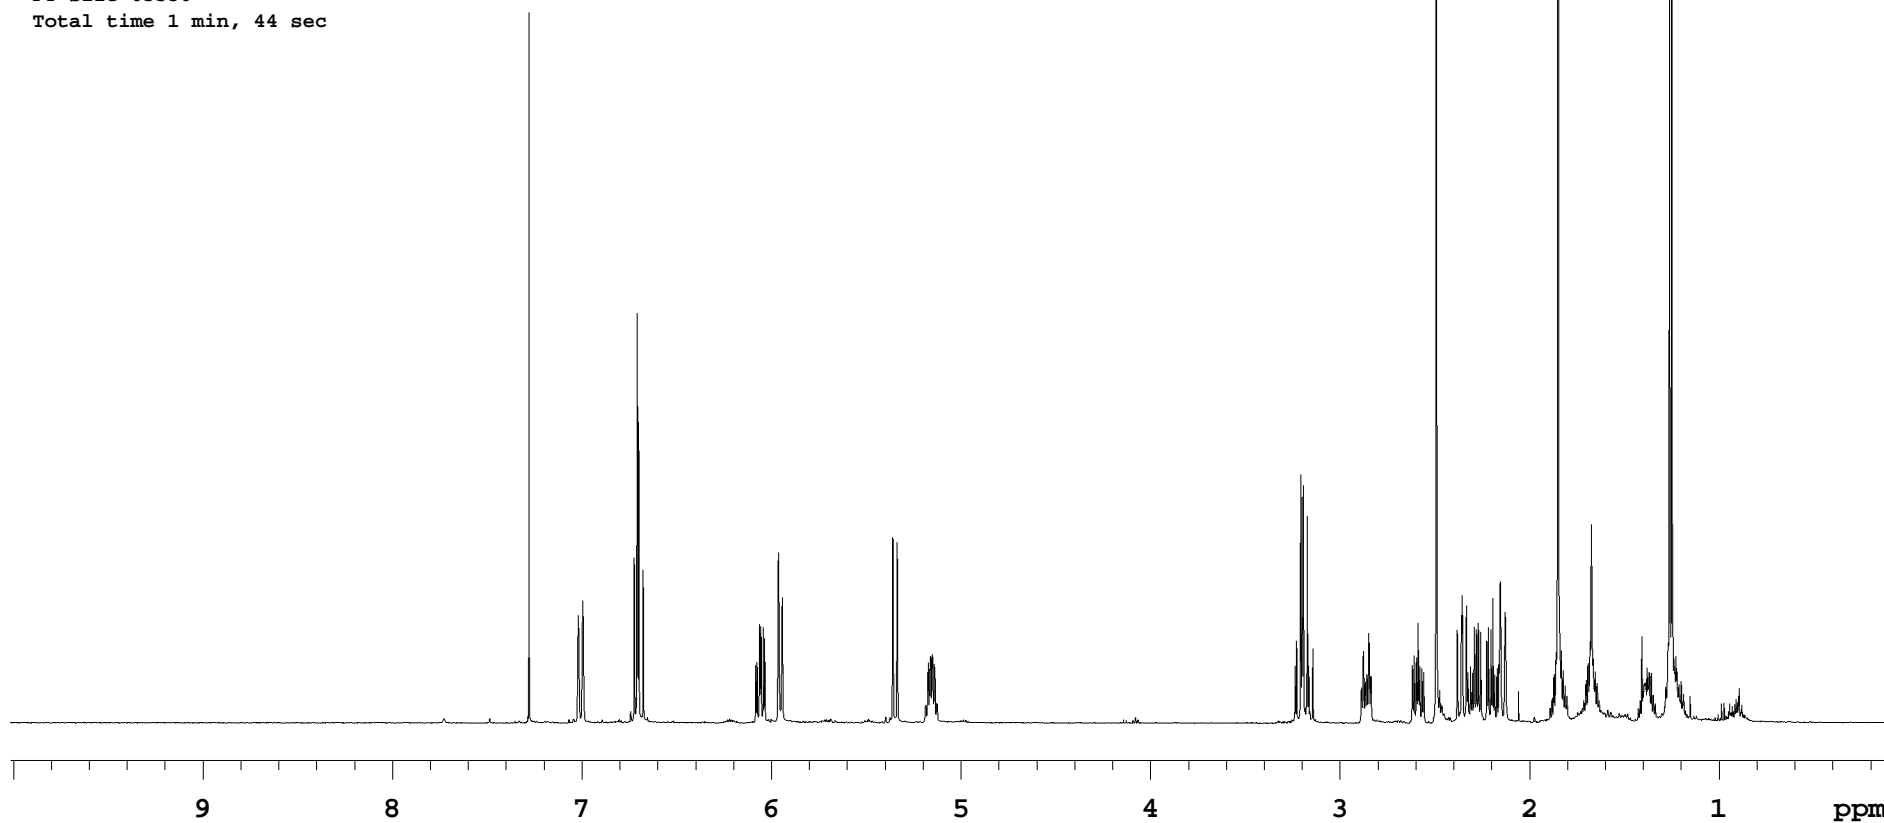

File: nmrdata/romo/jingli/NMR/2012/JL-13C 07-03-12/JL-365-A-2.fid

Pulse Sequence: s2pul

Solvent: cdcl3  
Ambient temperature  
Operator: jingli  
File: JL-365-A-2  
INOVA-500 "nmrsun1"

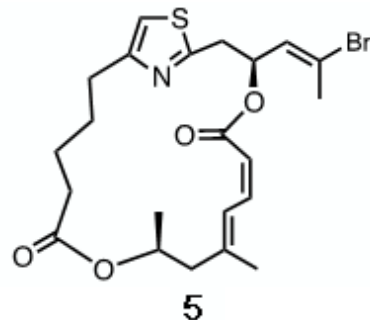

Relax. delay 1.000 sec  
Pulse 45.0 degrees  
Acq. time 1.300 sec  
Width 32894.7 Hz  
64 repetitions  
OBSERVE C13, 125.6848202 MHz  
DECOUPLE H1, 499.8422608 MHz  
Power 49 dB  
continuously on  
WALTZ-16 modulated  
DATA PROCESSING  
Resol. enhancement -0.0 Hz  
FT size 131072  
Total time 4 min, 56 sec

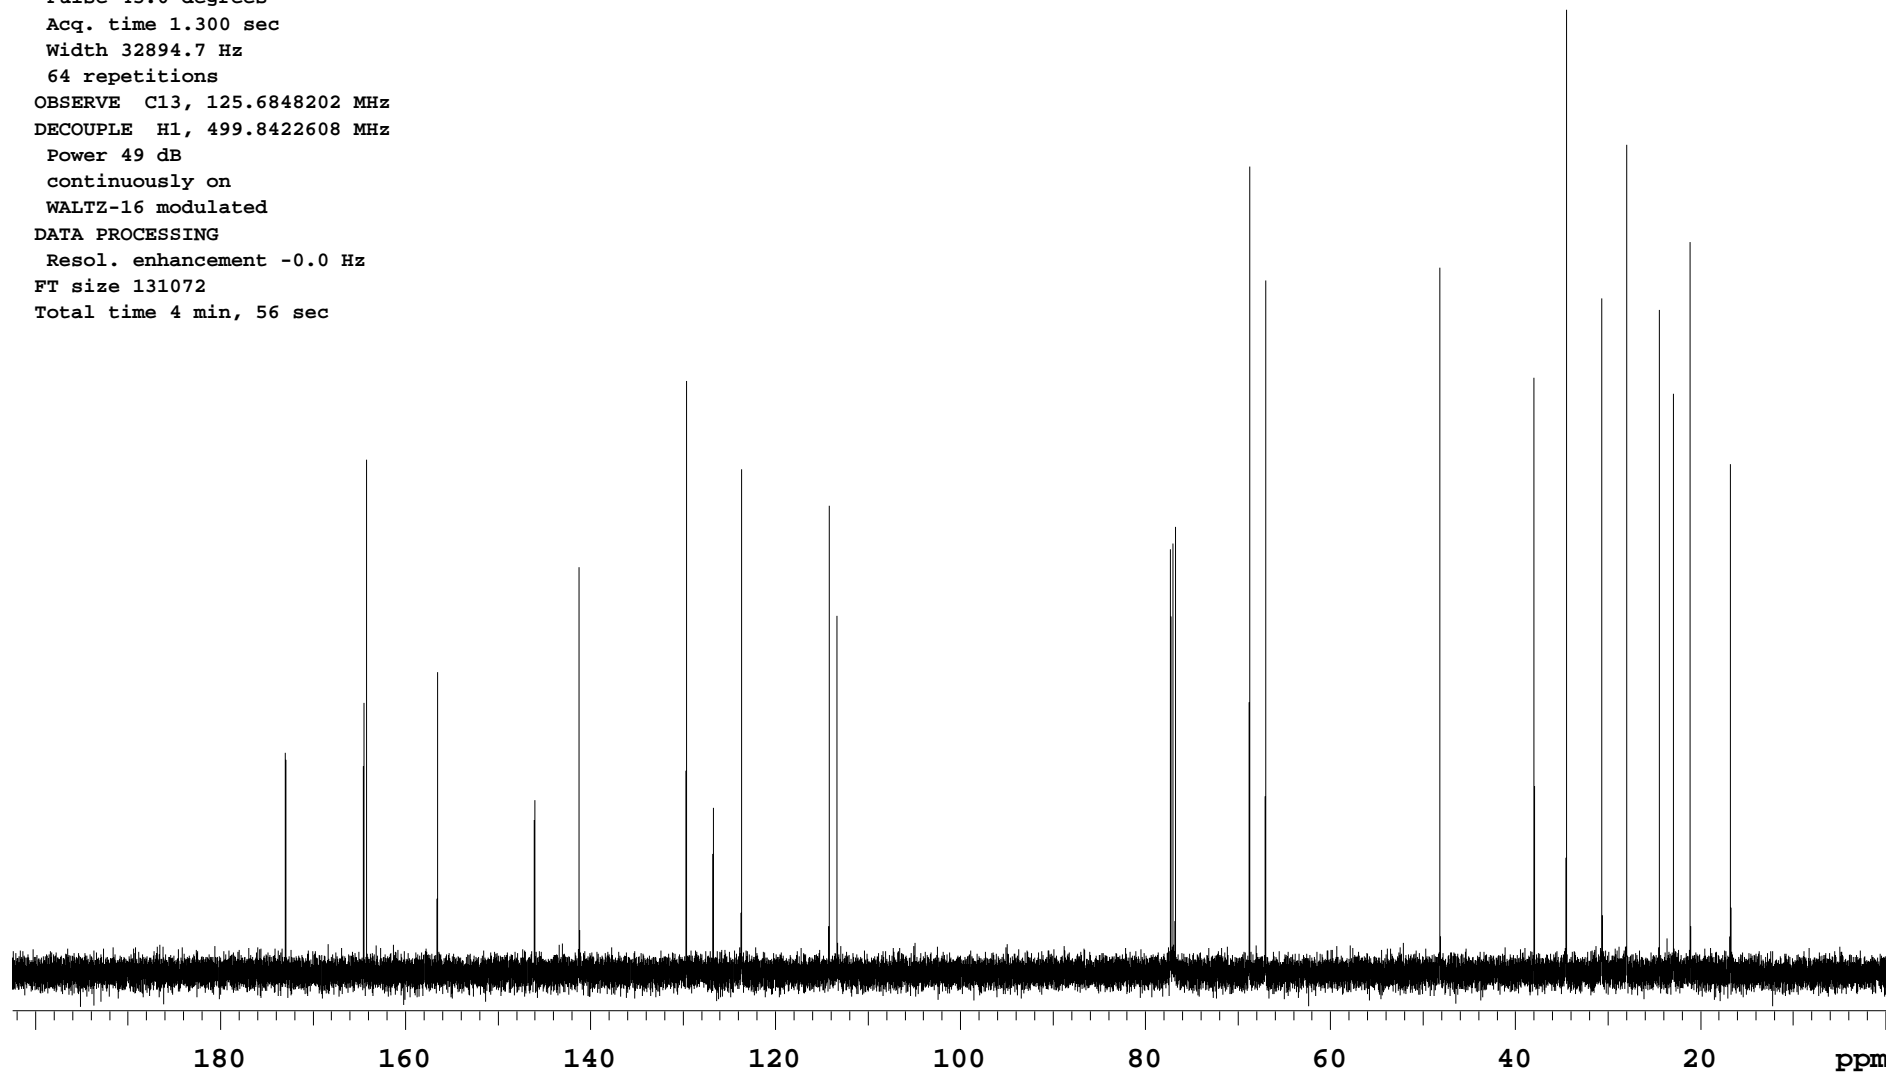

File: nmrdata/romo/jingli/NMR/2011/JL-1H-07-22-11 update/JL-267-C-1.fid

Pulse Sequence: s2pul

Solvent: cdc13  
Temp. 22.0 C / 295.1 K  
Operator: jingli  
File: JL-267-C-1  
INOVA-500 "nmrsun1"

Pulse 30.0 degrees  
Acq. time 2.892 sec  
Width 7997.6 Hz  
49 repetitions  
OBSERVE H1, 499.7830868 MHz  
DATA PROCESSING  
FT size 65536  
Total time 1 hr, 1 min, 53 sec

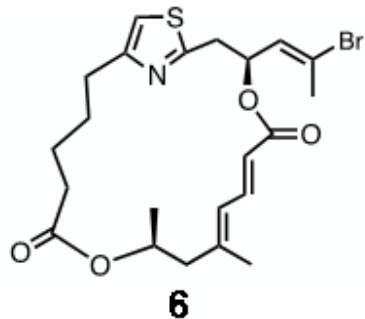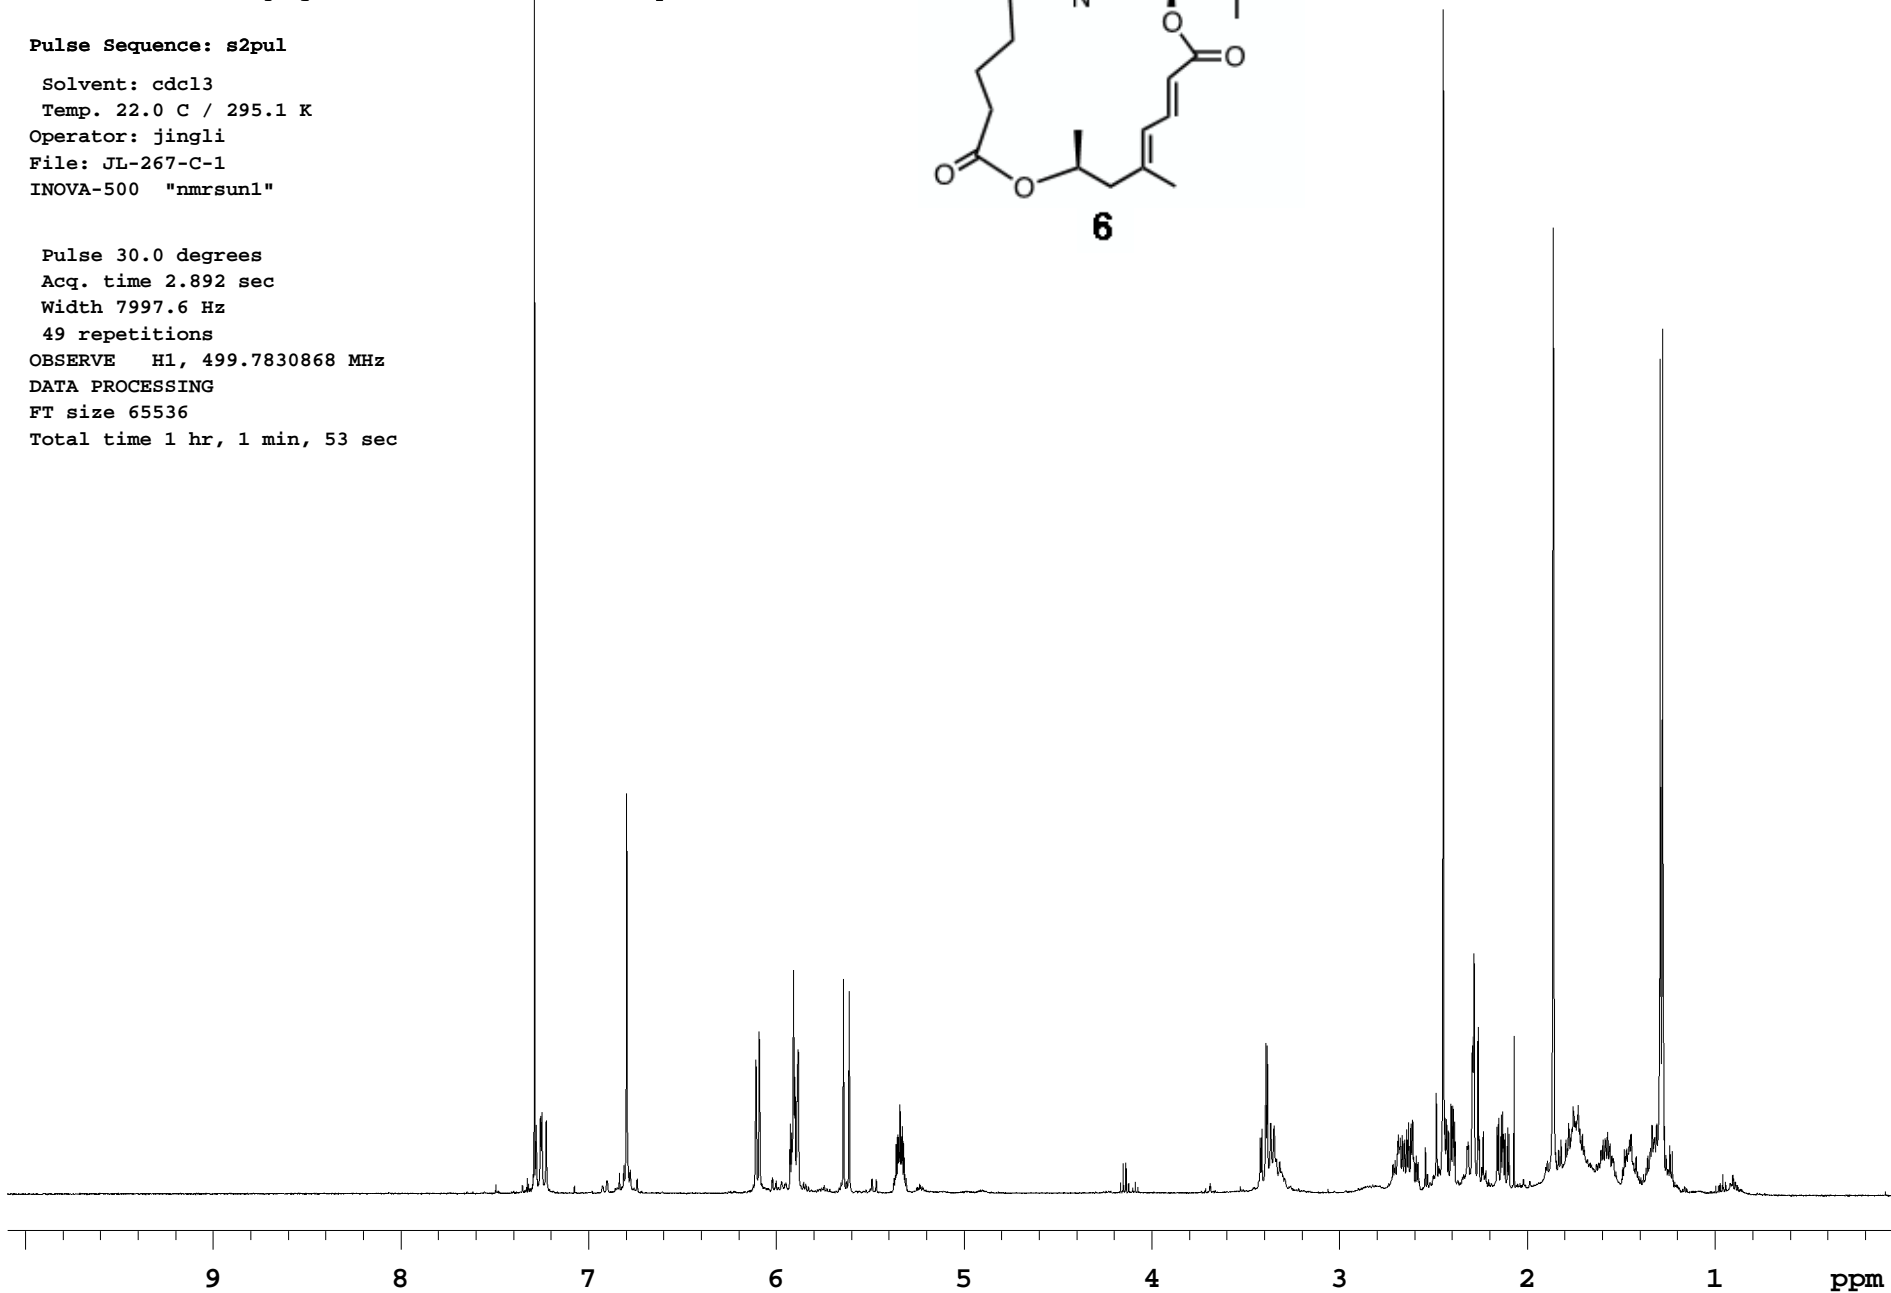

File: nmrdata/romo/jingli/NMR/2012/JL-13C 07-03-12/JL-368-C-2.fid

Pulse Sequence: s2pul

Solvent: cdcl3  
Ambient temperature  
Operator: jingli  
File: JL-368-C-2  
INOVA-500 "nmrsun1"

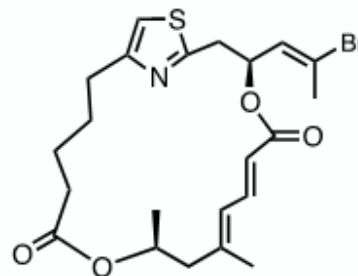

**6**

Relax. delay 1.000 sec  
Pulse 45.0 degrees  
Acq. time 1.300 sec  
Width 32666.4 Hz  
256 repetitions  
OBSERVE C13, 125.6559786 MHz  
DECOUPLE H1, 499.7276076 MHz  
Power 43 dB  
continuously on  
WALTZ-16 modulated  
DATA PROCESSING  
Line broadening 0.5 Hz  
FT size 131072  
Total time 9 min, 51 sec

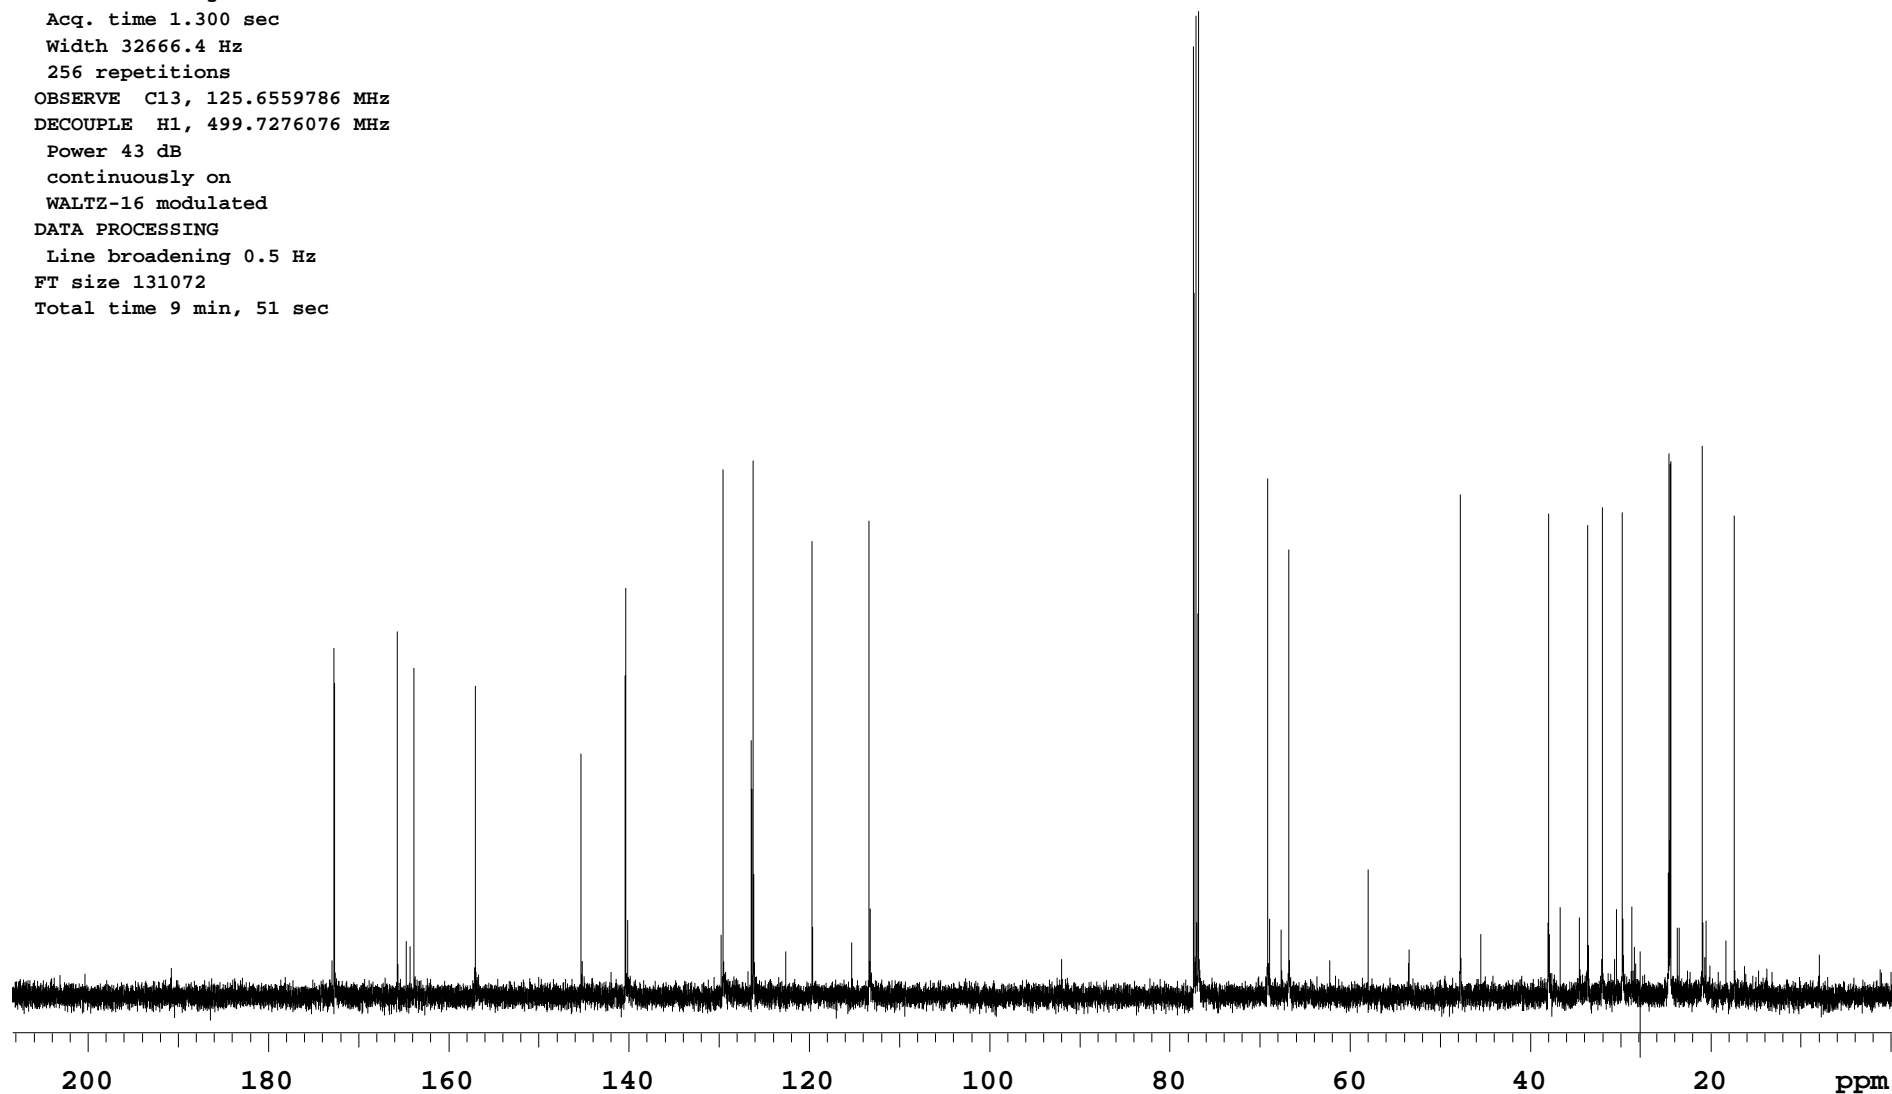

JL-402-B-repurify 1H CDCl3 11/07/11

File: nmldata/romo/jingli/NMR/2012/JL-1H 07-03-12/JL-402-B-1.fid

Pulse Sequence: s2pul

Solvent: cdcl3  
Temp. 23.0 C / 296.1 K  
Operator: jingli  
File: JL-402-B-1  
INOVA-500 "nmrsun1"

Relax. delay 1.000 sec  
Pulse 45.0 degrees  
Acq. time 2.049 sec  
Width 7990.4 Hz  
49 repetitions  
OBSERVE H1, 499.7251090 MHz  
DATA PROCESSING  
Resol. enhancement -0.0 Hz  
FT size 65536  
Total time 6 min, 37 sec

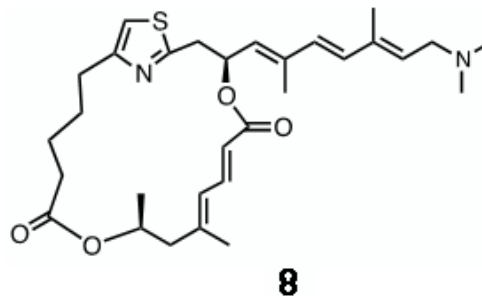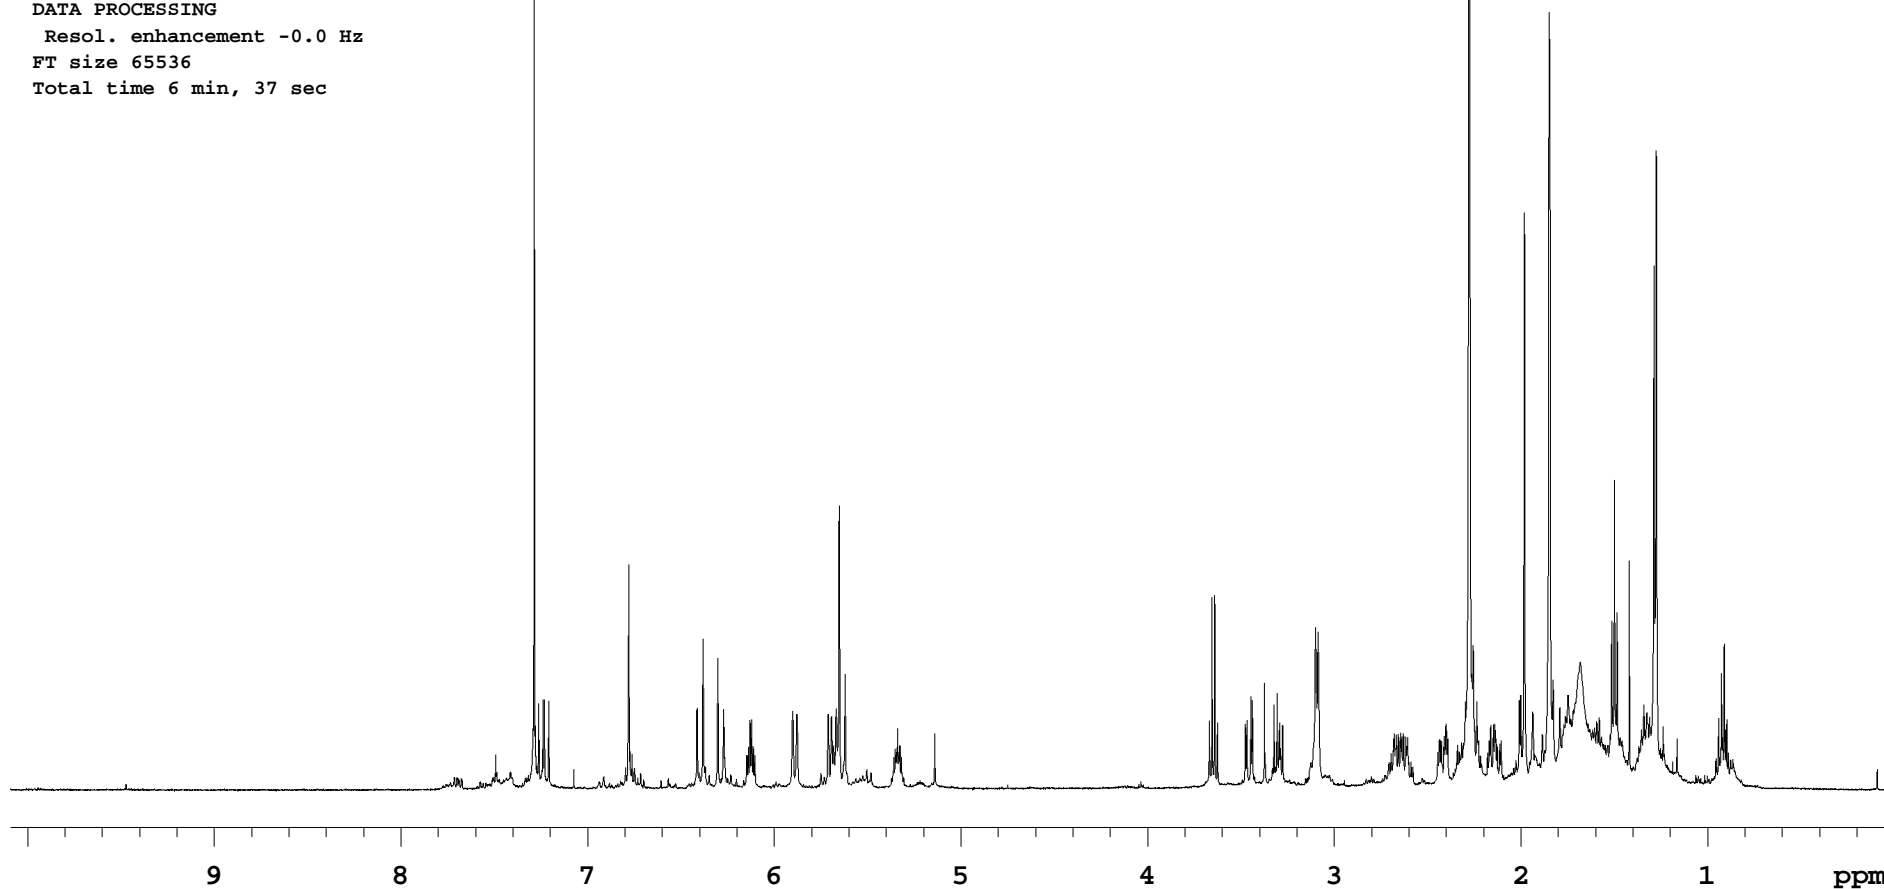

File: nmrdata/romo/jingli/NMR/2012/JL-13C 07-03-12/JL-402-B-2.fid

Pulse Sequence: s2pul

Solvent: cdcl3  
Ambient temperature  
Operator: jingli  
File: JL-402-B-2  
INOVA-500 "nmrsun1"

Relax. delay 1.000 sec  
Pulse 45.0 degrees  
Acq. time 1.300 sec  
Width 32894.7 Hz  
34944 repetitions  
OBSERVE C13, 125.6848087 MHz  
DECOUPLE H1, 499.8422608 MHz  
Power 49 dB  
continuously on  
WALTZ-16 modulated  
DATA PROCESSING  
Resol. enhancement -0.0 Hz  
FT size 131072  
Total time 32 hr, 50 min, 42 sec

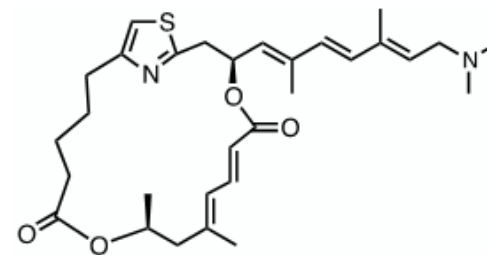

8

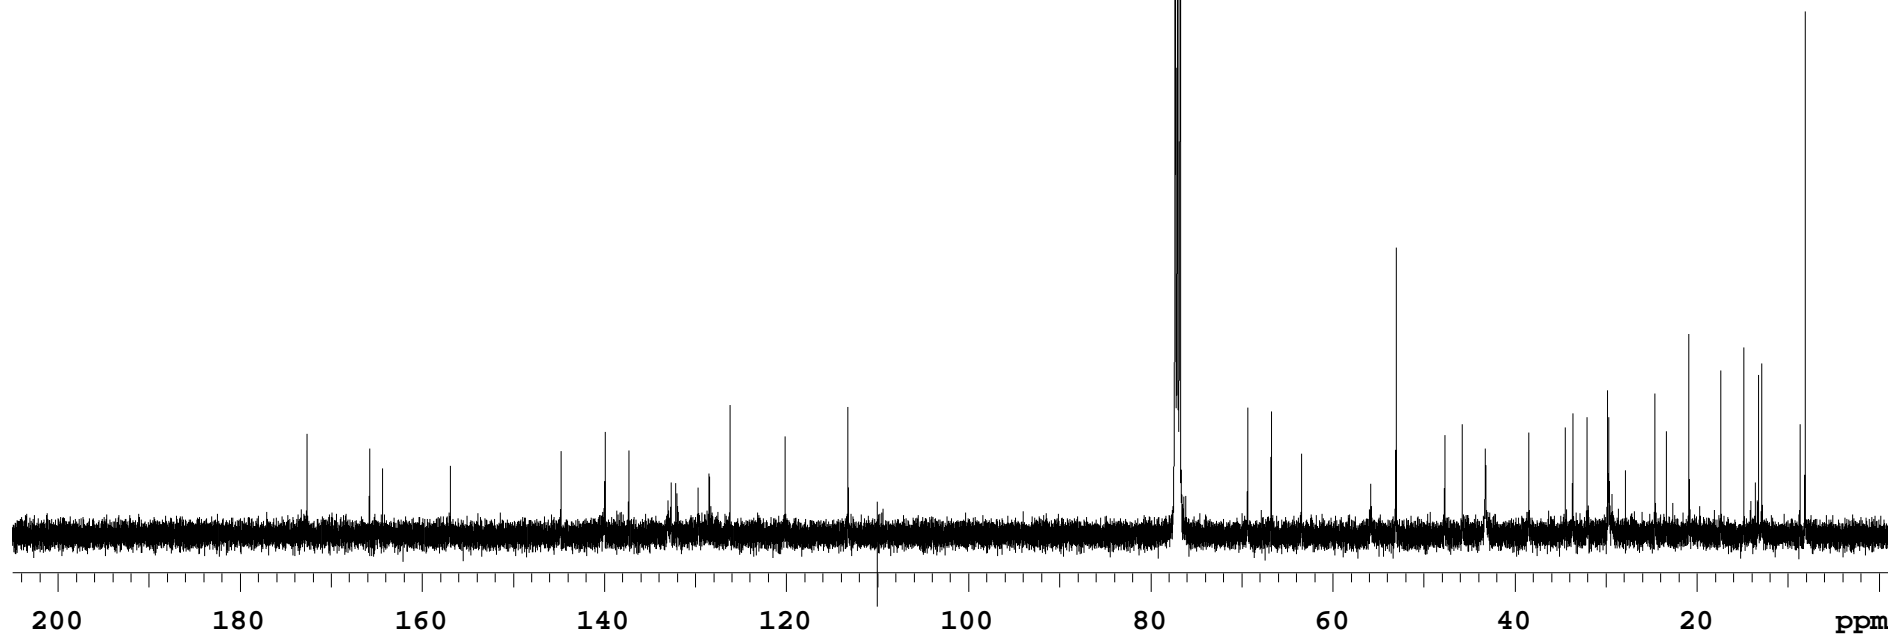



MZ176

Sample: MZ176

File: home/romo/mzhu/vnmrsys/data/MZ176-500MHz.fid

Pulse Sequence: s2pul

Solvent: cdcl3

Ambient temperature

Operator: mzhu

File: MZ176-500MHz

INOVA-500 "inova500b"

Relax. delay 1.000 sec

Pulse 45.0 degrees

Acq. time 2.049 sec

Width 7995.2 Hz

32 repetitions

OBSERVE H1, 499.7251090 MHz

DATA PROCESSING

Resol. enhancement -0.0 Hz

FT size 65536

Total time 1 min, 44 sec

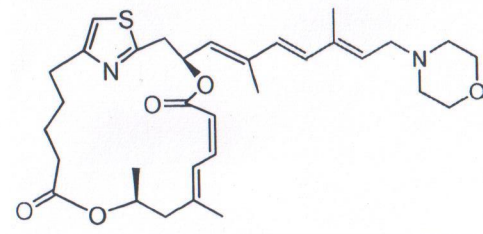

9b

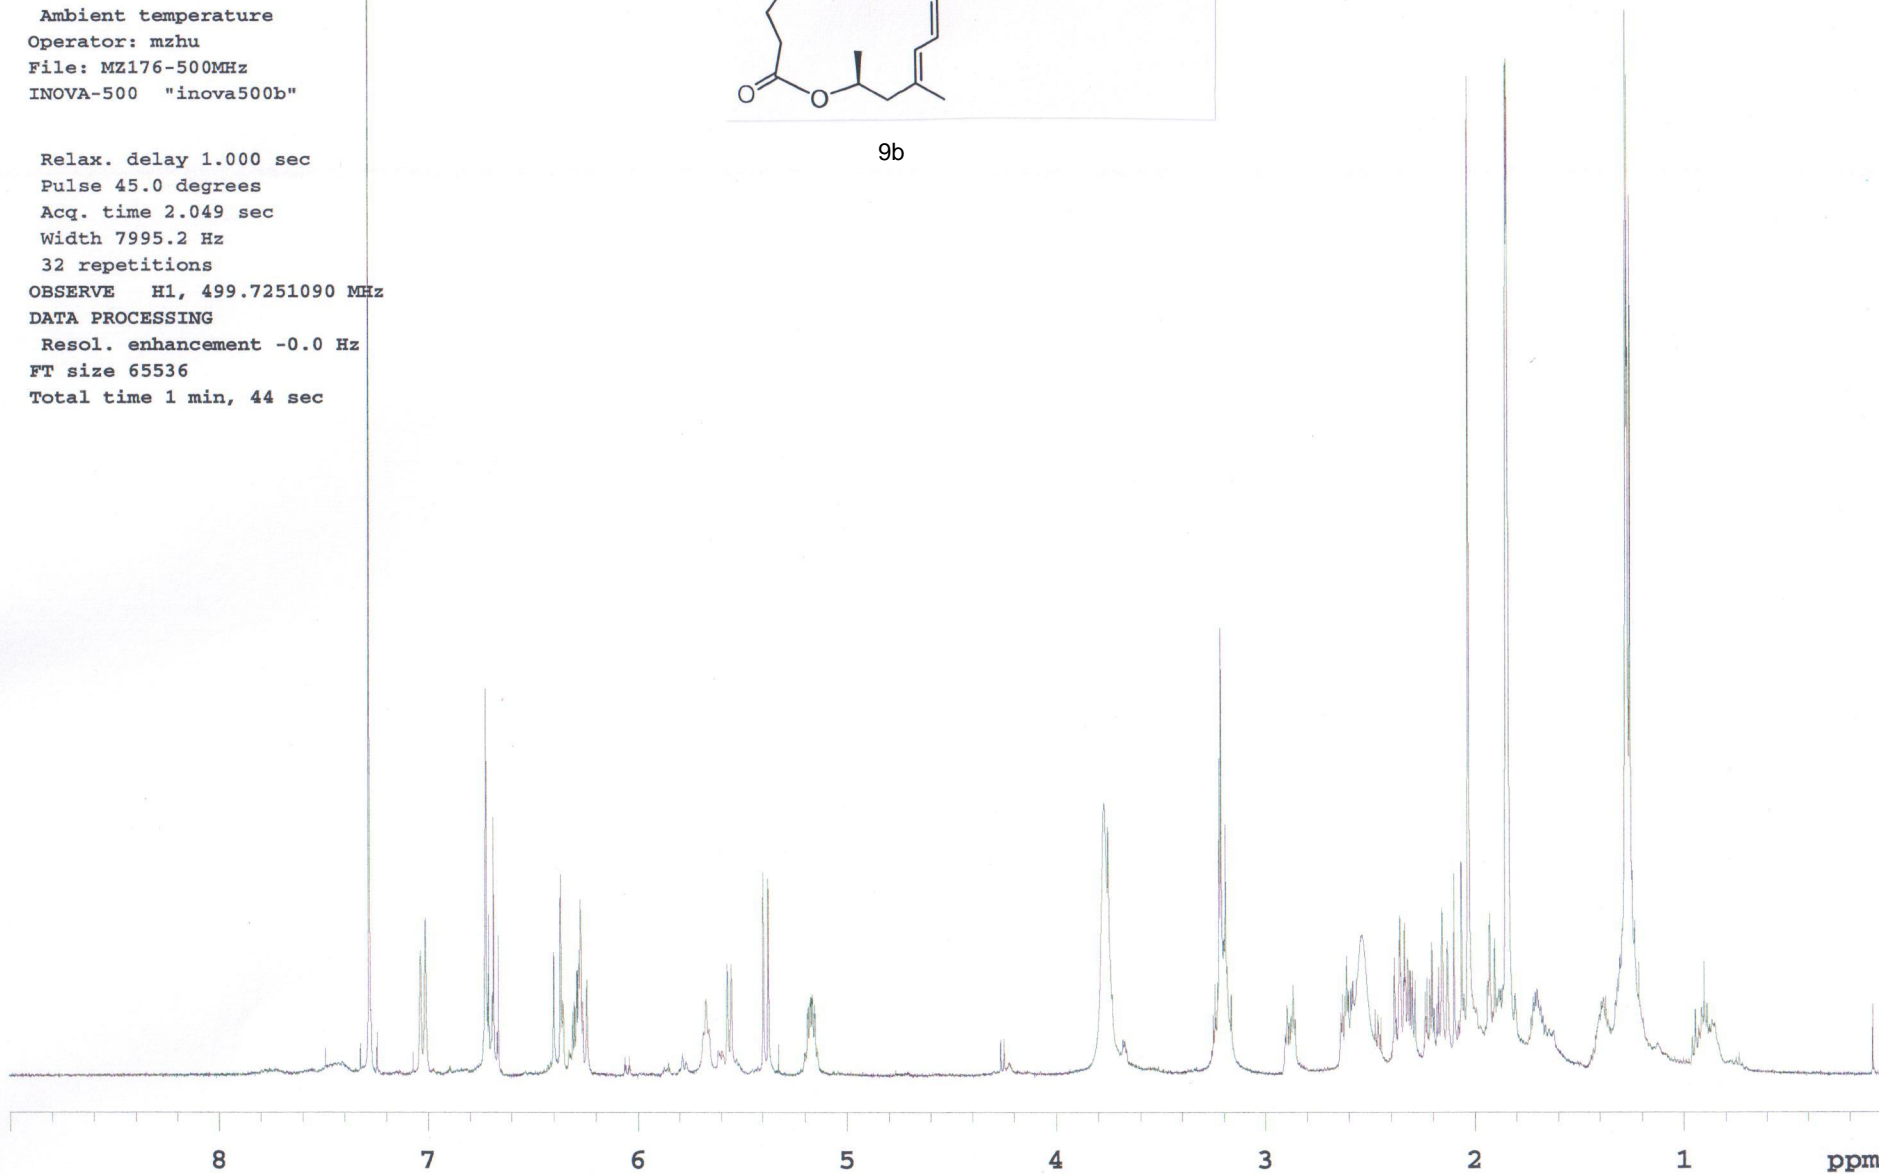

MZ176

Sample: home/MZ176/mzhu/vnmrsys/data/MZ176-13C.fid  
File: home/romo/mzhu/vnmrsys/data/MZ176-13C.fid  
Pulse Sequence: s2pul  
Pulse Sequence: s2pul  
Solvent: cdcl3  
Ambient temperature  
Operator: jingli  
File: MZ176-13C  
INOVA-500 "nmrsun1"

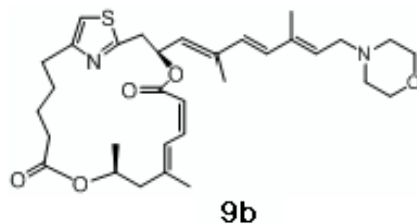

Relax. delay 1.000 sec  
Pulse 45.0 degrees  
Acq. time 1.300 sec  
Width 30487.8 Hz  
61688 repetitions  
OBSERVE C13, 125.6848069 MHz  
DECOUPLE H1, 499.8422608 MHz  
Power 49 dB  
continuously on  
WALTZ-16 modulated  
DATA PROCESSING  
Line broadening 0.5 Hz  
FT size 131072  
Total time 164 hr, 13 min, 32 sec

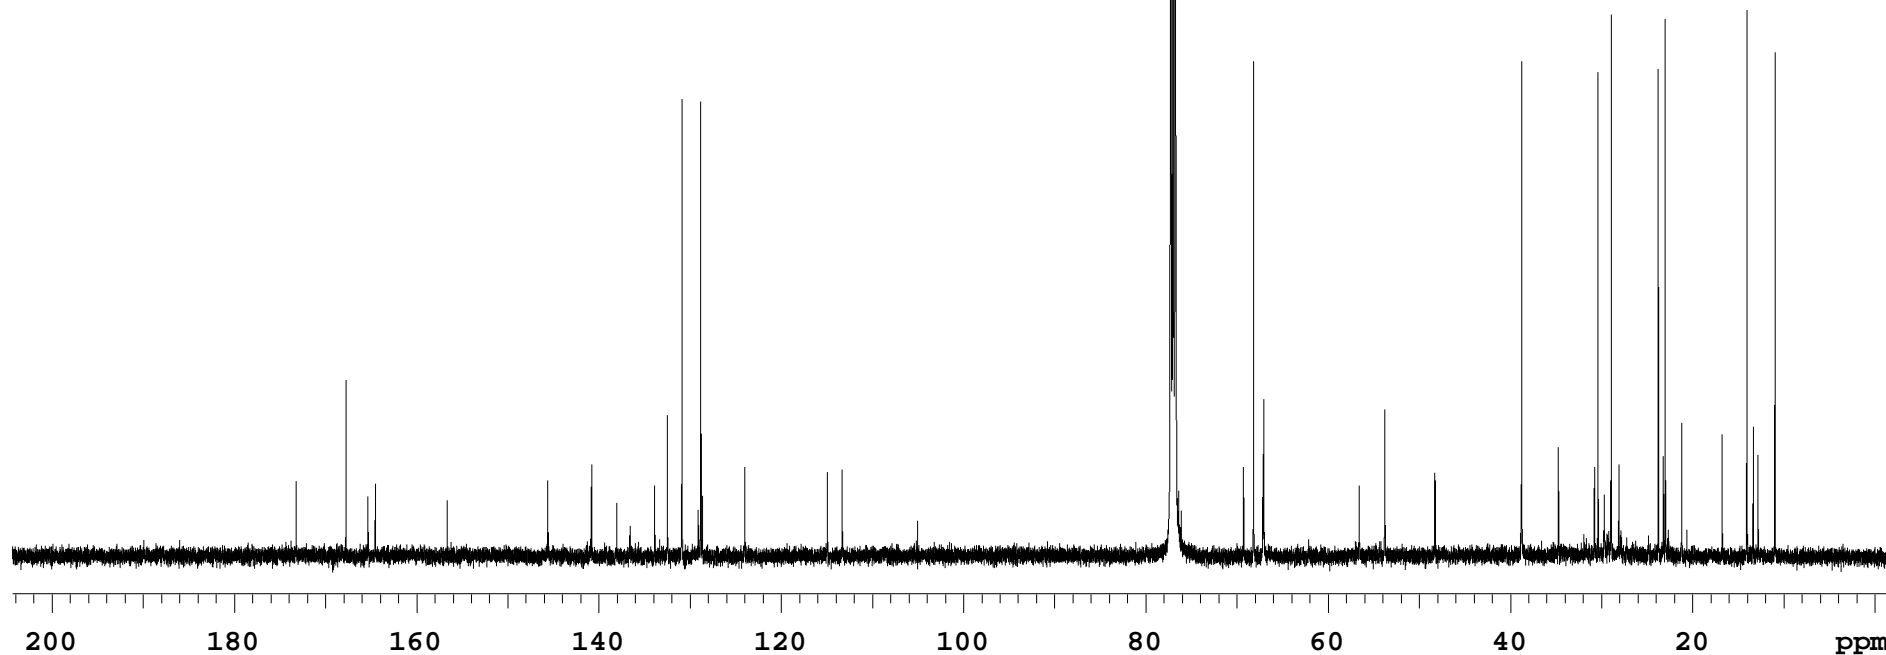

MZ181

Sample: MZ181

File: home/romo/mzhu/vnmrsys/data/MZ181-300MHz-rep.fid

Pulse Sequence: s2pul

Solvent: cdcl3

Ambient temperature

Operator: mzhu

File: MZ181-300MHz-rep

INOVA-500 "inova500b"

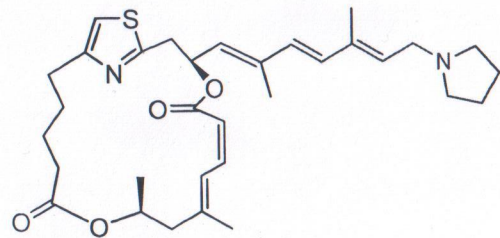

9c

Relax. delay 1.000 sec

Pulse 45.0 degrees

Acq. time 2.049 sec

Width 3599.6 Hz

8 repetitions

OBSERVE H1, 299.9579261 MHz

DATA PROCESSING

Resol. enhancement -0.0 Hz

FT size 65536

Total time 0 min, 31 sec

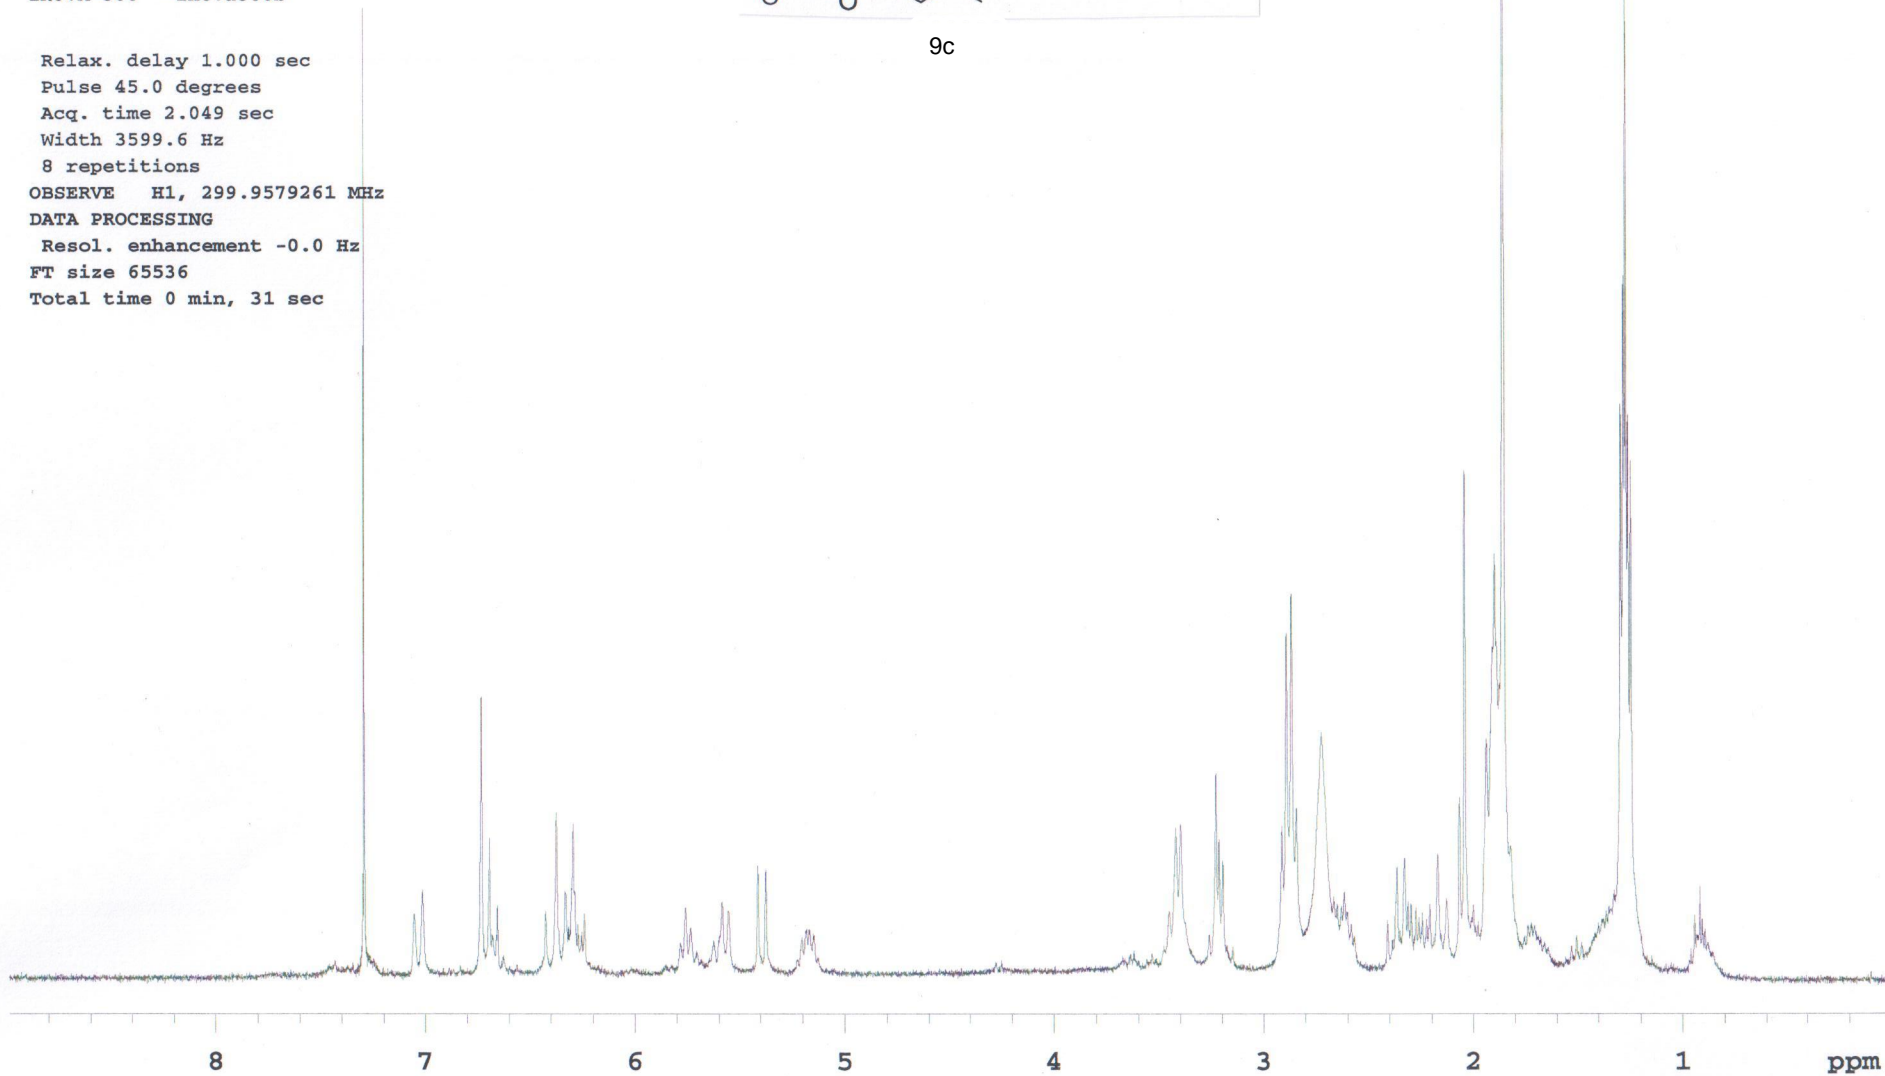

MZ181

Sample: MZ181

File: home/romo/mzhu/vnmrsys/data/MZ181-13C.fid

Pulse Sequence: s2pul

Solvent: cdc13

Ambient temperature

Operator: jingli

File: MZ181-13C

INOVA-500 "nmrsun1"

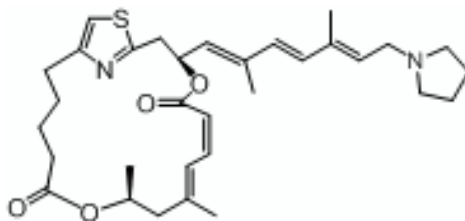

9c

Relax. delay 1.000 sec  
Pulse 45.0 degrees  
Acq. time 1.300 sec  
Width 30487.8 Hz  
57728 repetitions  
OBSERVE C13, 125.6848079 MHz  
DECOUPLE H1, 499.8422608 MHz  
Power 49 dB  
continuously on  
WALTZ-16 modulated  
DATA PROCESSING  
Line broadening 0.5 Hz  
FT size 131072  
Total time 164 hr, 13 min, 32 sec

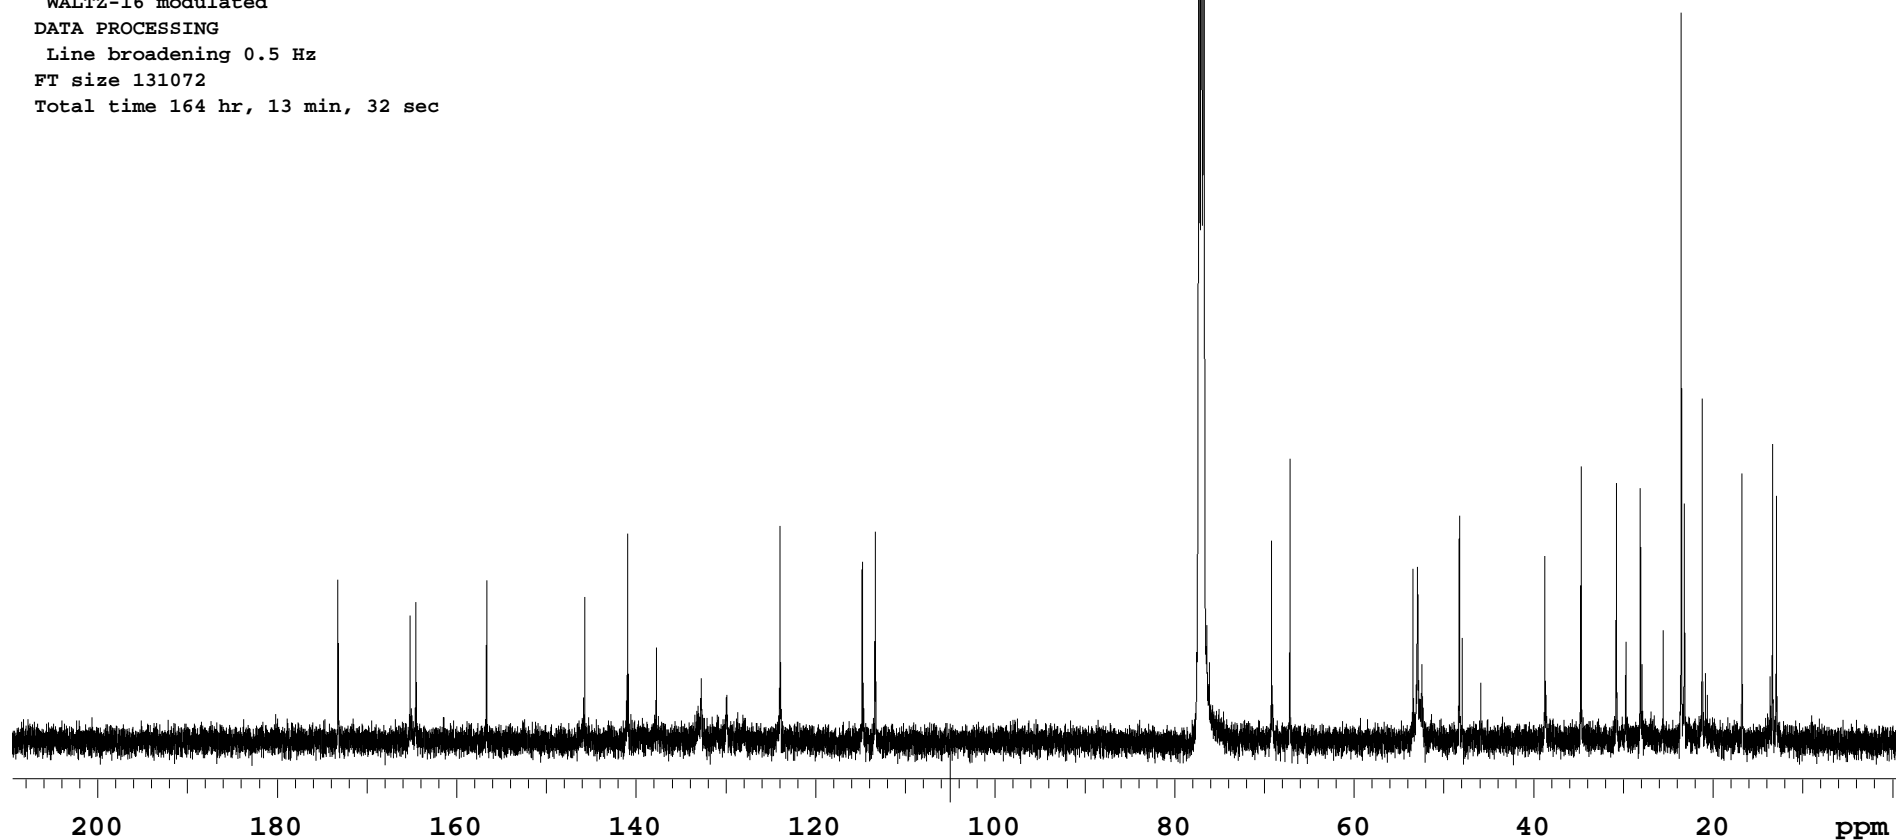

MZ205

Sample: MZ205

File: home/romo/mzhu/vnmrsys/data/MZ205-500MHz.fid

Pulse Sequence: s2pul

Solvent: cdcl3

Ambient temperature

Operator: mzhu

File: MZ205-500MHz

INOVA-500 "inova500b"

Relax. delay 1.000 sec

Pulse 45.0 degrees

Acq. time 2.049 sec

Width 5996.6 Hz

16 repetitions

OBSERVE H1, 499.7251090 MHz

DATA PROCESSING

Resol. enhancement -0.0 Hz

FT size 65536

Total time 0 min, 55 sec

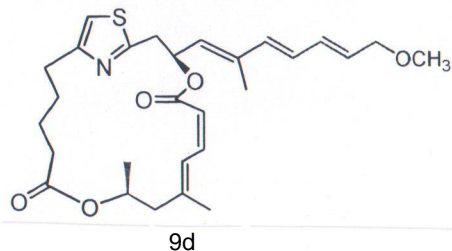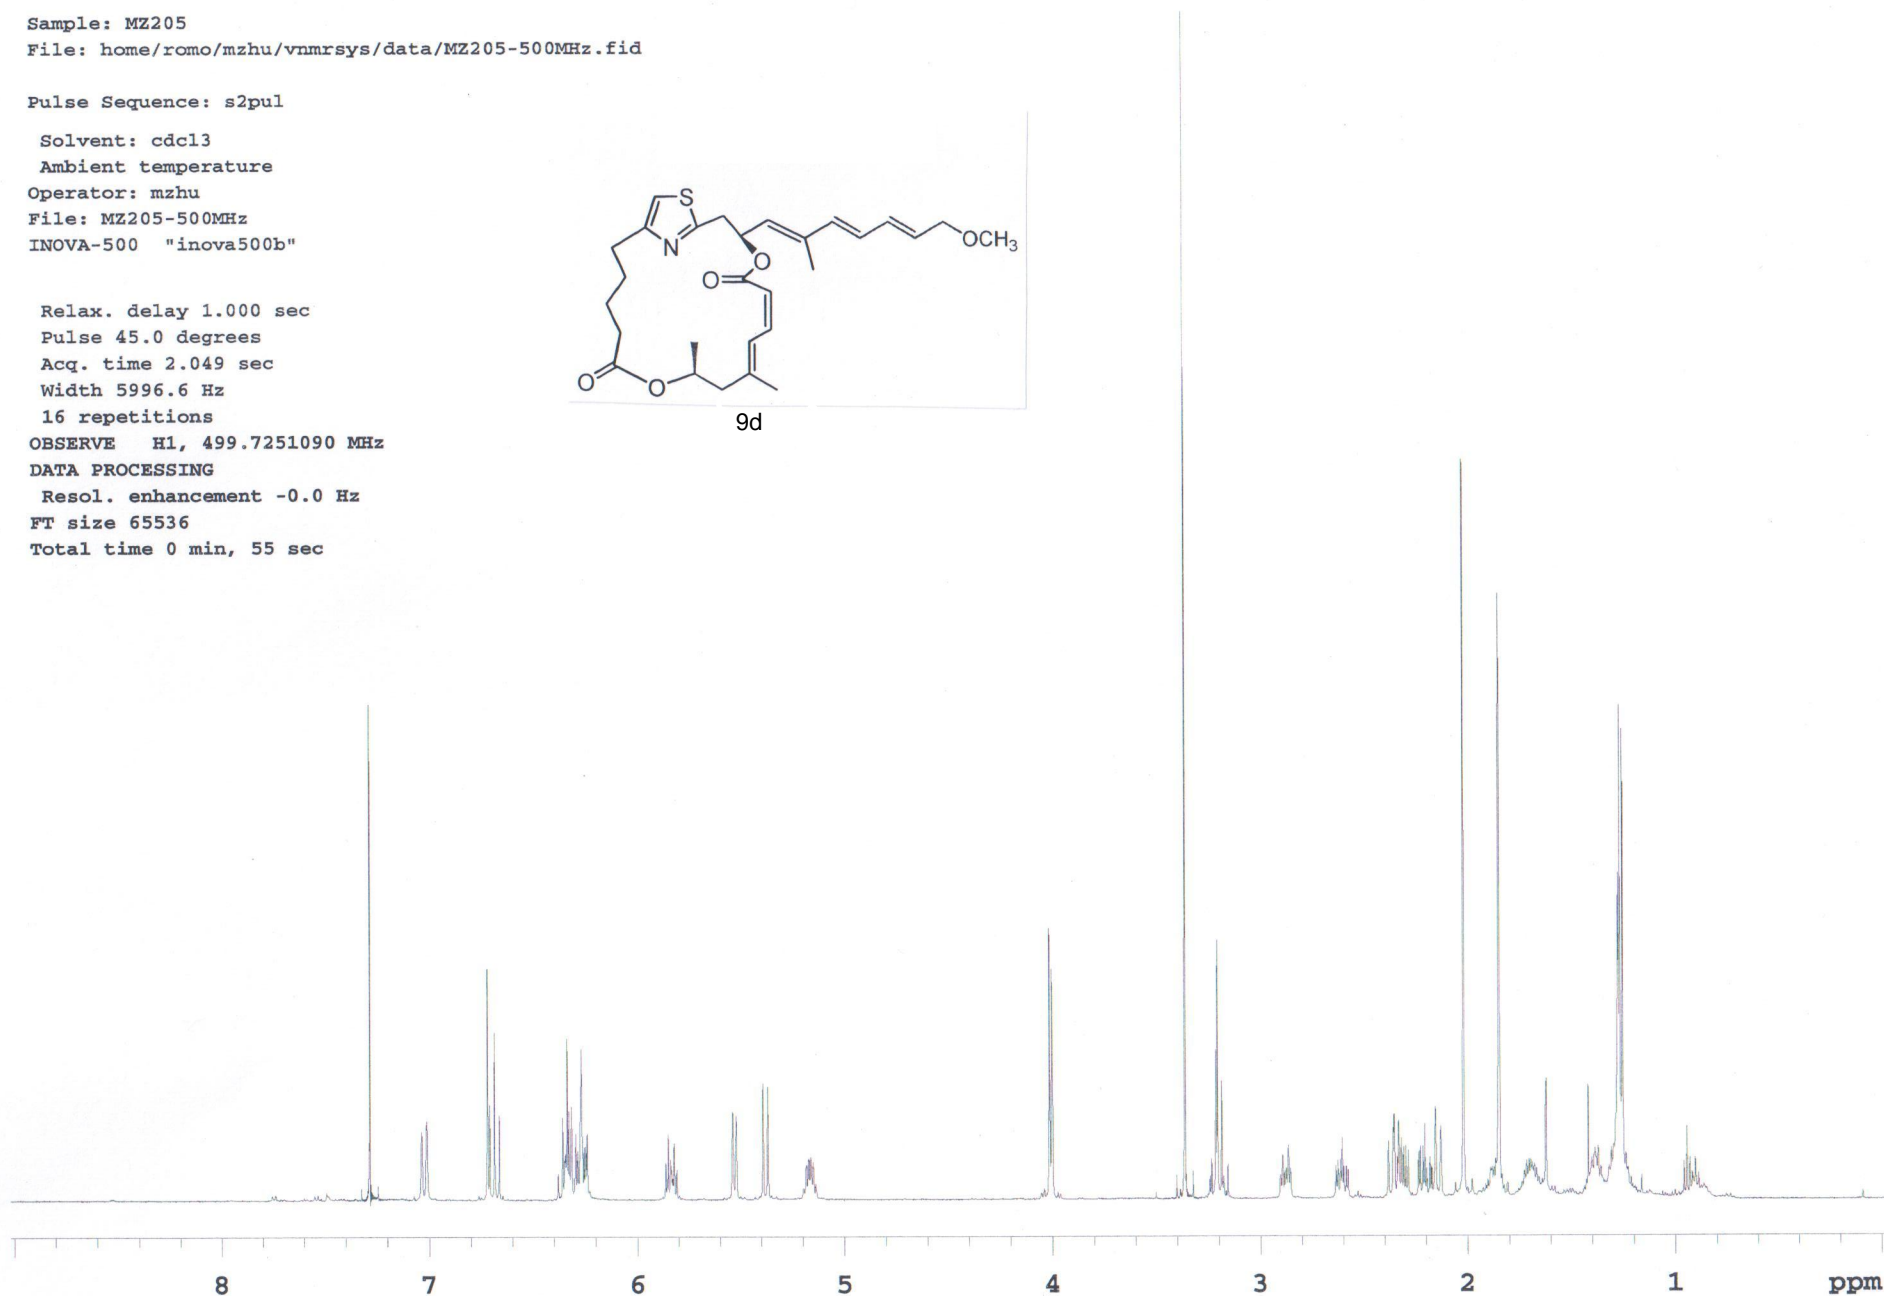

MZ205

Sample: MZ205

File: home/romc/mzhu/vnmrsys/data/MZ205-13C.fid

Pulse Sequence: s2pul

Solvent: cdc13

Ambient temperature

Operator: mzhu

File: MZ205-13C

INOVA-500 "nmrsun1"

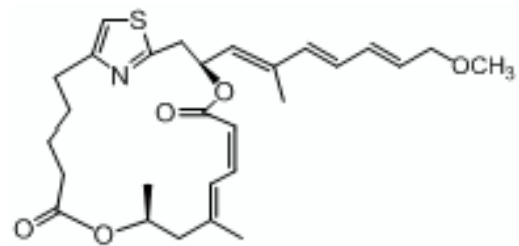

9d

Relax. delay 1.000 sec  
Pulse 45.0 degrees  
Acq. time 1.300 sec  
Width 30154.5 Hz  
256000 repetitions  
OBSERVE C13, 125.6559786 MHz  
DECOUPLE H1, 499.7276076 MHz  
Power 43 dB  
continuously on  
WALTZ-16 modulated  
DATA PROCESSING  
Line broadening 0.5 Hz  
FT size 131072  
Total time 164 hr, 13 min, 19 sec

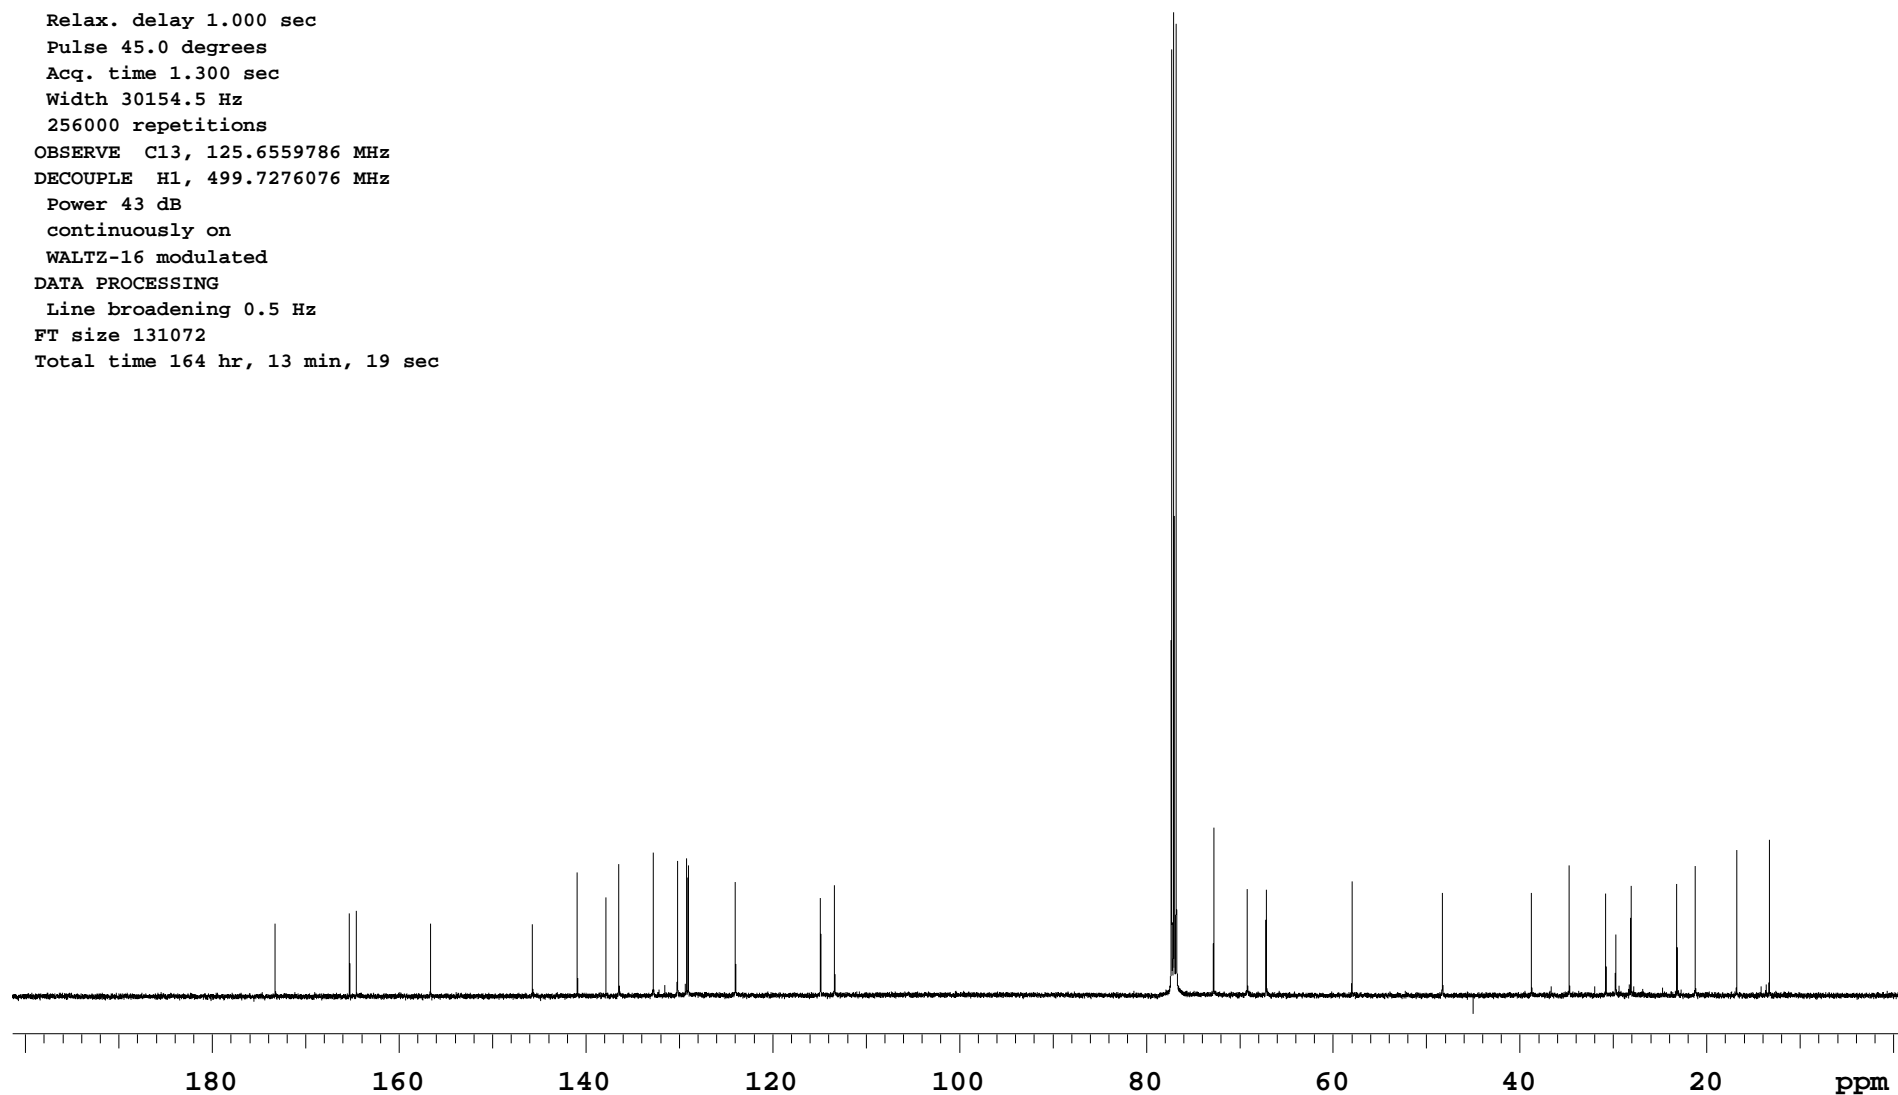

MZ203

Sample: MZ203

File: home/romo/mzhu/vnmrsys/data/MZ203-500MHz.fid

Pulse Sequence: s2pul

Solvent: cdcl3

Ambient temperature

Operator: mzhu

File: MZ203-500MHz

INOVA-500 "inova500b"

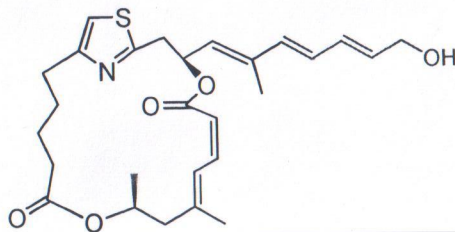

9e

Relax. delay 1.000 sec

Pulse 45.0 degrees

Acq. time 2.049 sec

Width 5996.6 Hz

16 repetitions

OBSERVE H1, 499.7251545 MHz

DATA PROCESSING

Resol. enhancement -0.0 Hz

FT size 65536

Total time 0 min, 55 sec

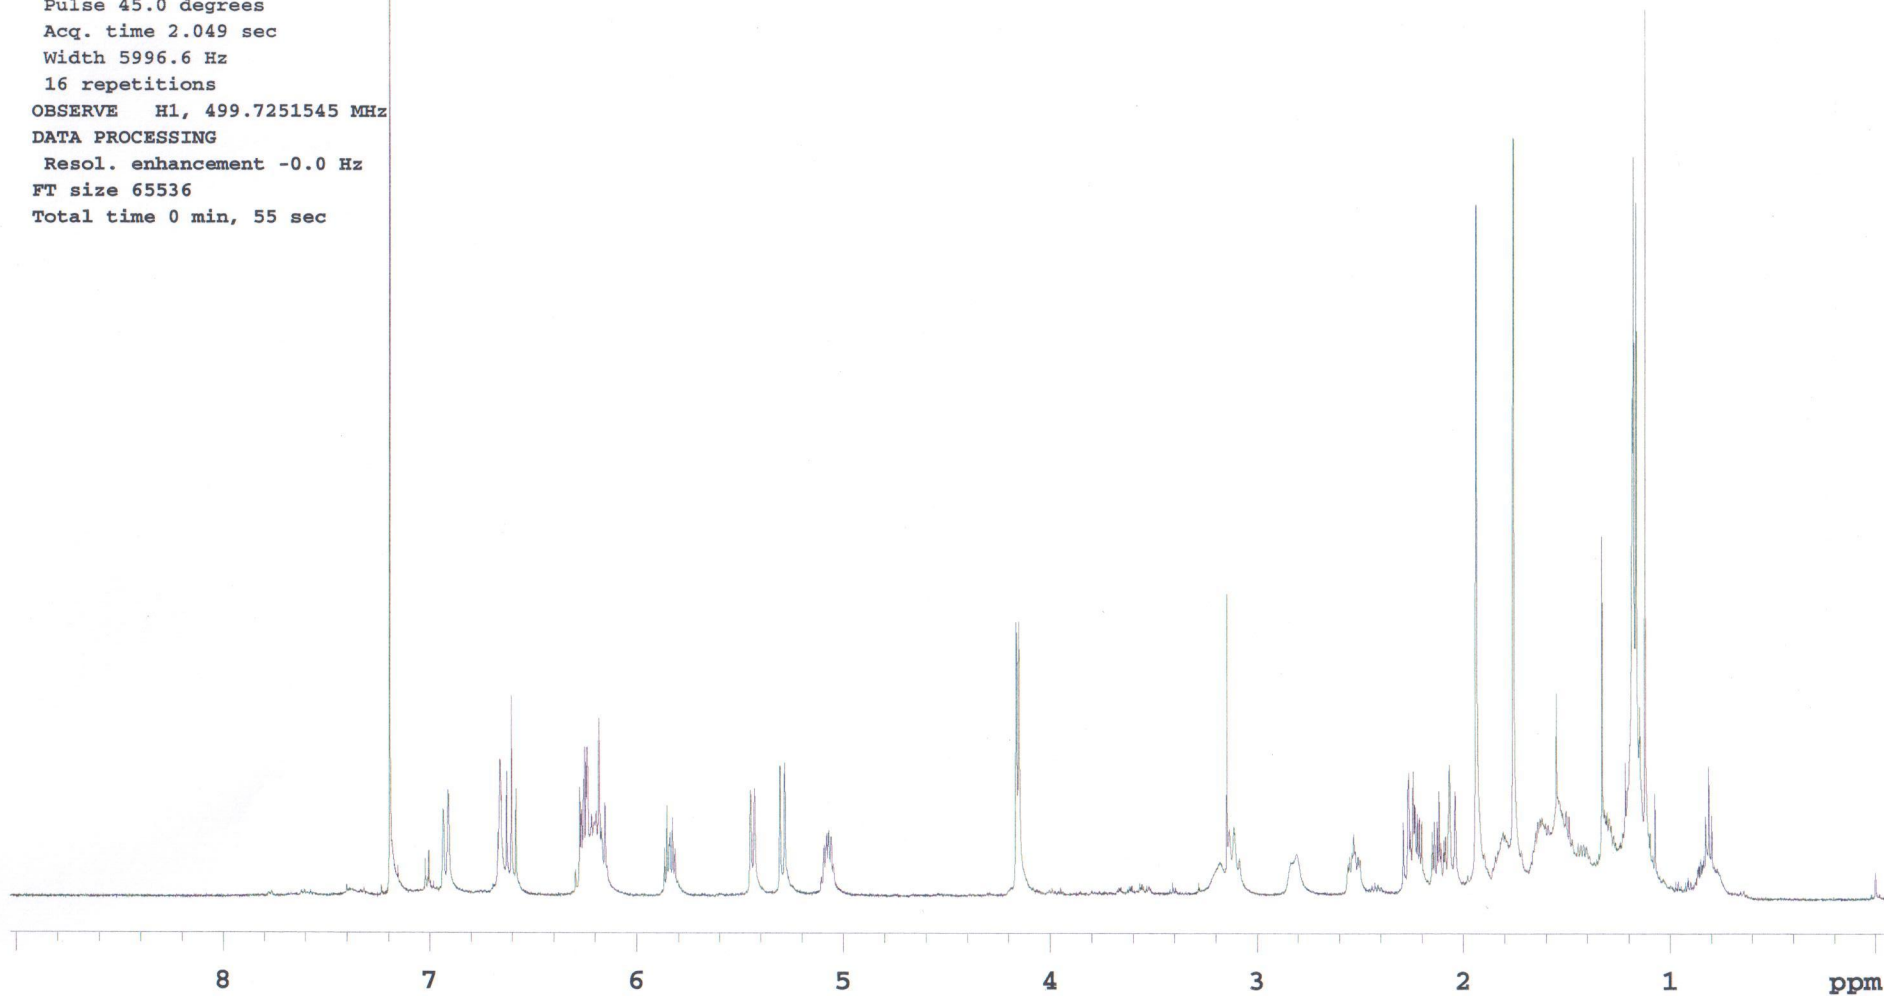

MZ-203

File: home/romo/mzhu/vnmrsys/data/MZ203-13C-500MHz

Pulse Sequence: s2pul

Solvent: cdcl3

Ambient temperature

Operator: jingli

File: MZ203-13C-500MHz (copy)

INOVA-500 "nmrsun1"

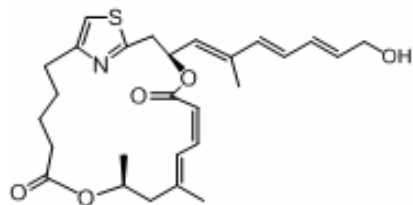

9e

Relax. delay 1.000 sec  
Pulse 45.0 degrees  
Acq. time 1.300 sec  
Width 30487.8 Hz  
31984 repetitions  
OBSERVE C13, 125.6848065 MHz  
DECOUPLE H1, 499.8422608 MHz  
Power 49 dB  
continuously on  
WALTZ-16 modulated  
DATA PROCESSING  
Line broadening 0.5 Hz  
FT size 131072  
Total time 164 hr, 13 min, 32 sec

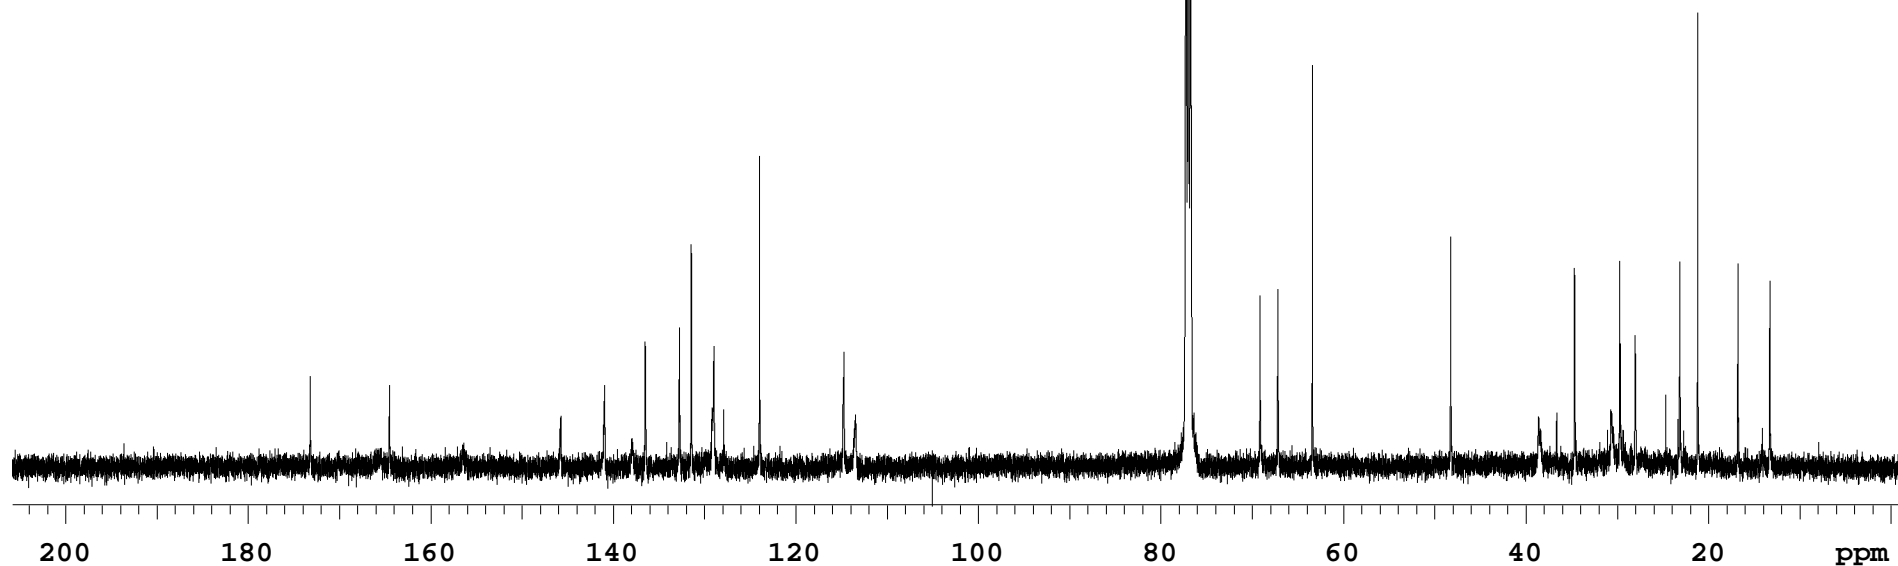



MZ190

Sample: MZ190

File: home/romo/mzhu/vnmrsys/data/MZ190-300MHz.fid

Pulse Sequence: s2pul

Solvent: cdcl3

Ambient temperature

Operator: mzhu

File: MZ190-300MHz

INOVA-500 "inova500b"

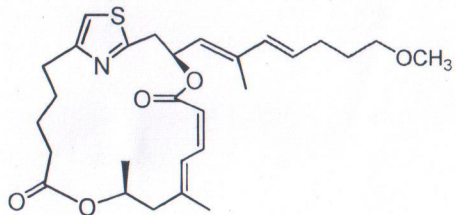

9f

Relax. delay 1.000 sec

Pulse 45.0 degrees

Acq. time 2.049 sec

Width 3599.6 Hz

32 repetitions

OBSERVE H1, 299.9579261 MHz

DATA PROCESSING

Resol. enhancement -0.0 Hz

FT size 65536

Total time 1 min, 44 sec

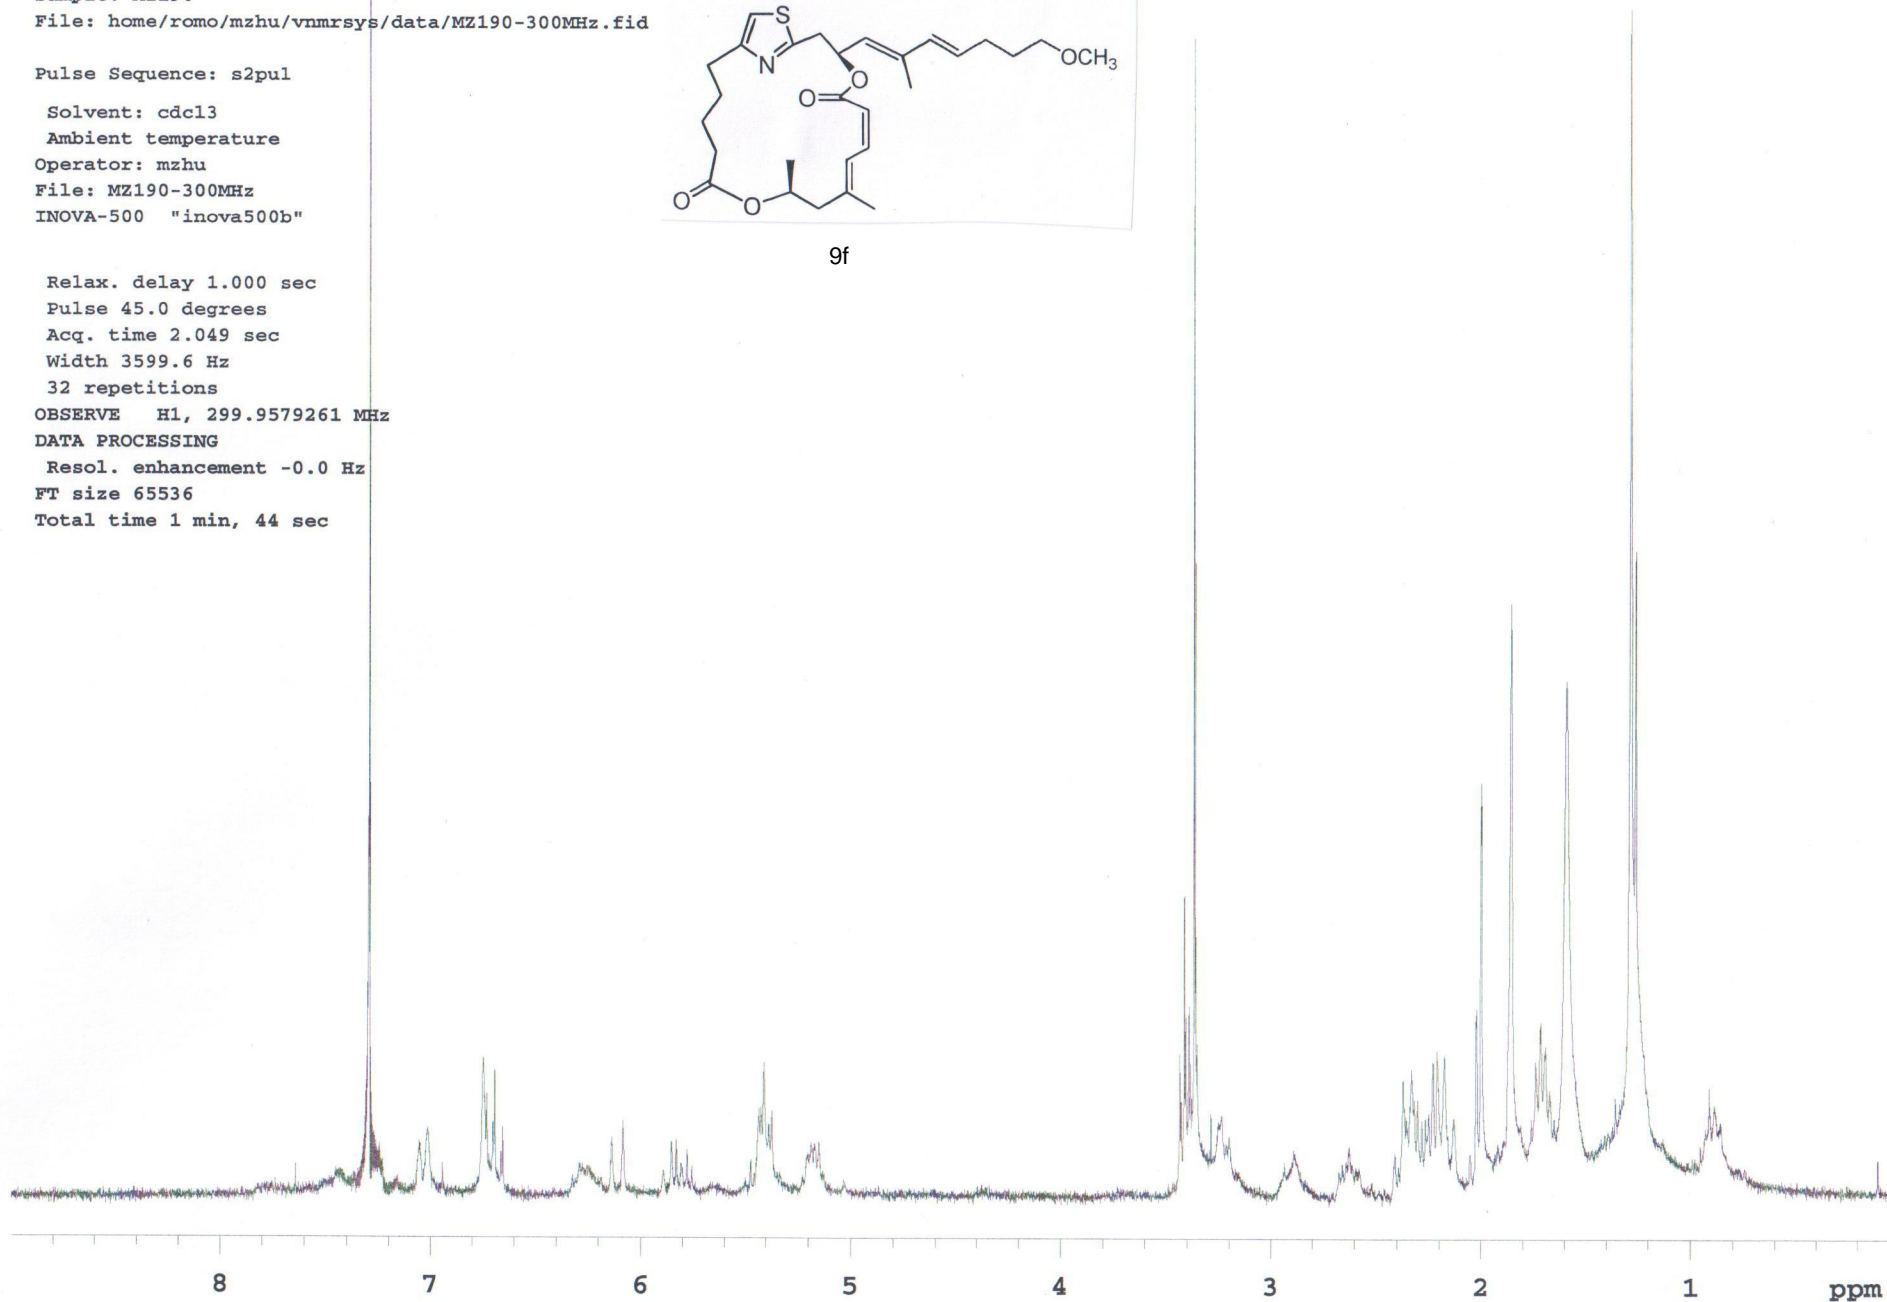

MZ189

Sample: MZ189

File: home/romc/mzhu/vnmrsys/data/MZ189-500MHz.fid

Pulse Sequence: s2pul

Solvent: cdcl3

Ambient temperature

Operator: mzhu

File: MZ189-500MHz

INOVA-500 "inova500b"

Relax. delay 1.000 sec

Pulse 45.0 degrees

Acq. time 2.049 sec

Width 5996.6 Hz

32 repetitions

OBSERVE H1, 499.7251090 MHz

DATA PROCESSING

Resol. enhancement -0.0 Hz

FT size 65536

Total time 1 min, 44 sec

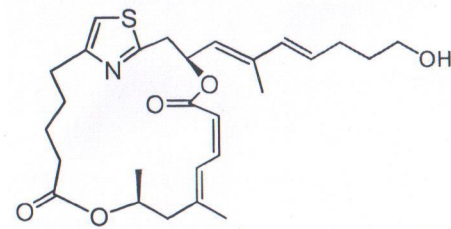

9g

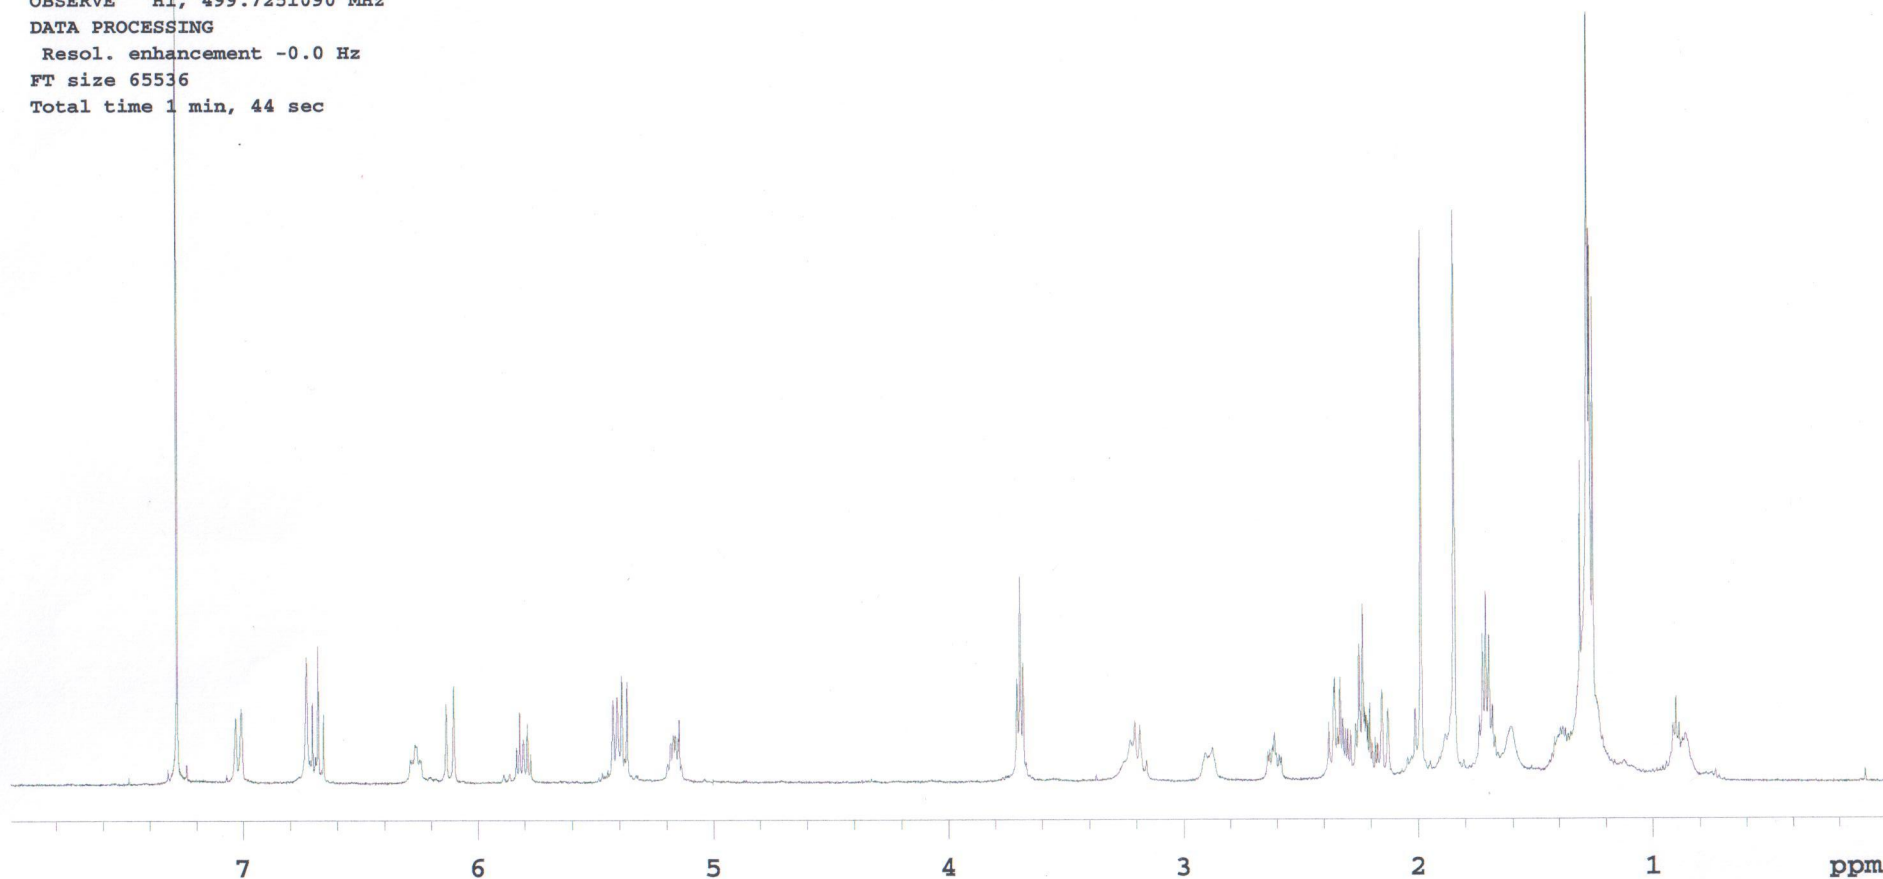

MZ189

Sample: MZ189

File: home/romo/mzhu/vnmrsys/data/MZ189-13C.fid

Pulse Sequence: s2pul

Solvent: cdc13

Ambient temperature

Operator: mzhu

File: MZ189-13C

INOVA-500 "nmrsun1"

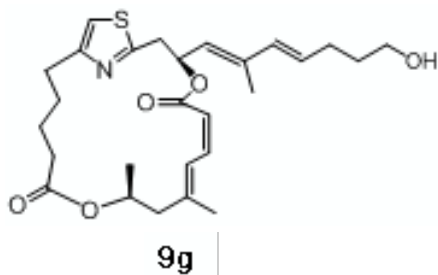

Relax. delay 1.000 sec  
Pulse 45.0 degrees  
Acq. time 1.300 sec  
Width 30154.5 Hz  
30976 repetitions  
OBSERVE C13, 125.6559786 MHz  
DECOUPLE H1, 499.7276076 MHz  
Power 43 dB  
continuously on  
WALTZ-16 modulated  
DATA PROCESSING  
Line broadening 0.5 Hz  
FT size 131072  
Total time 164 hr, 13 min, 19 sec

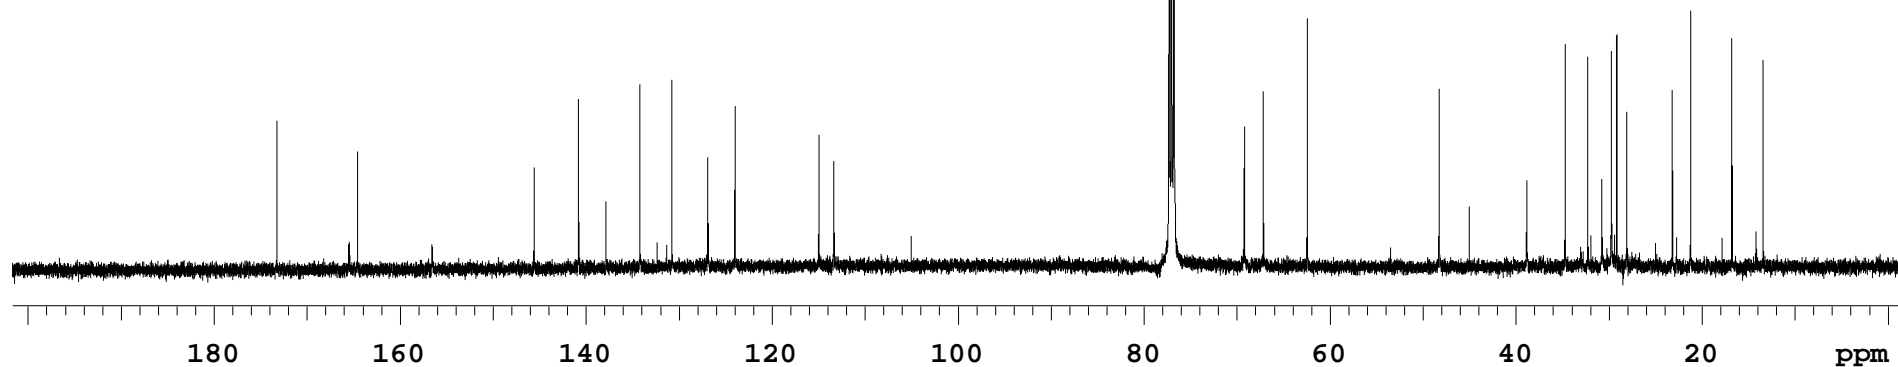

MZ216

Sample: MZ216

File: home/romo/mzhu/vnmrsys/data/MZ216-500MHz.fid

Pulse Sequence: s2pul

Solvent: cdcl3

Ambient temperature

Operator: mzhu

File: MZ216-500MHz

INOVA-500 "inova500"

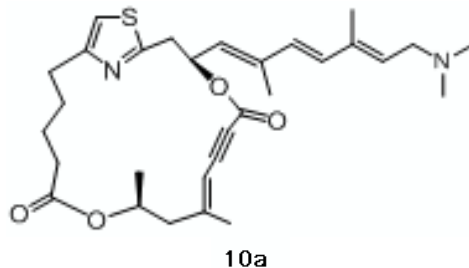

10a

Relax. delay 1.000 sec

Pulse 45.0 degrees

Acq. time 2.049 sec

Width 7995.2 Hz

128 repetitions

OBSERVE H1, 499.6879772 MHz

DATA PROCESSING

Resol. enhancement -0.0 Hz

FT size 65536

Total time 16 hr, 59 min, 15 sec

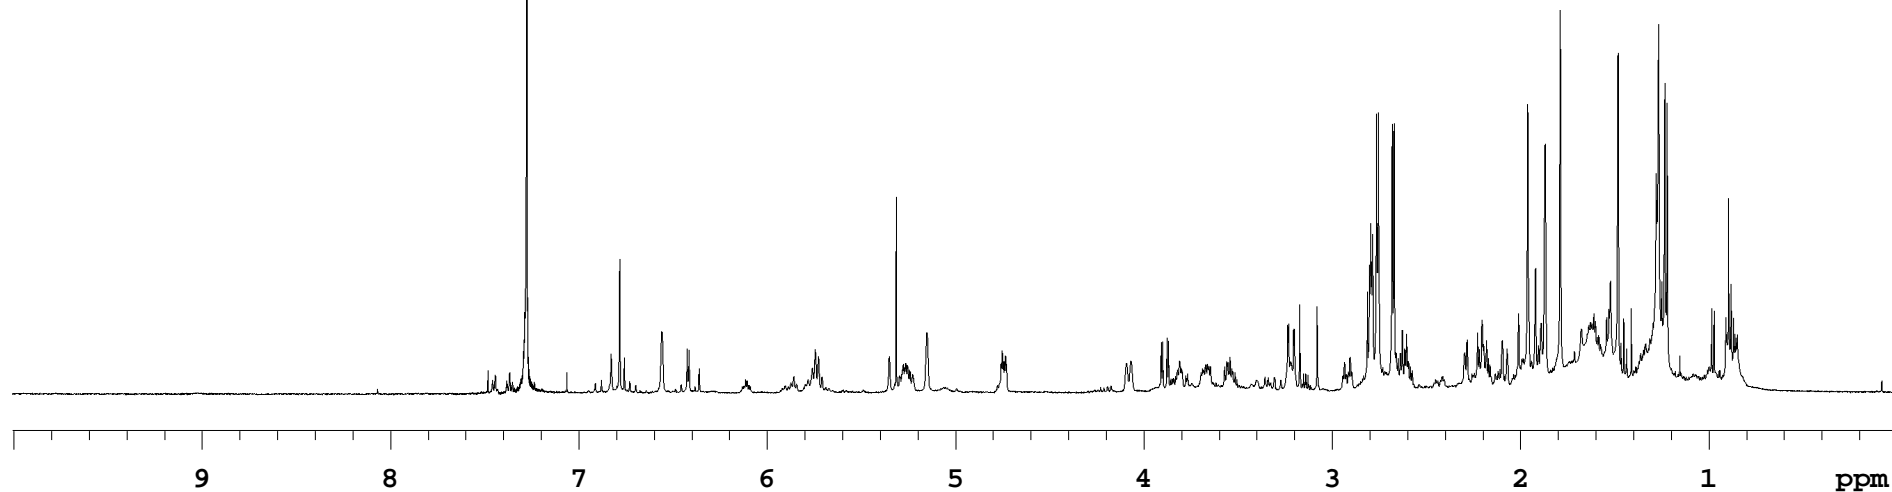

MZ195

Sample: MZ195

File: home/romo/mzhu/vnmrsys/Gata/MZ195-500MHz.fid

Pulse Sequence: s2pul

Solvent: cdcl3

Ambient temperature

Operator: mzhu

File: MZ195-500MHz

INOVA-500 "inova500b"

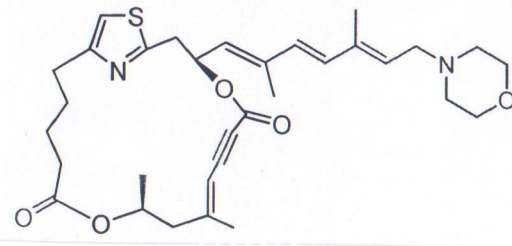

10b

Relax. delay 1.000 sec

Pulse 45.0 degrees

Acq. time 2.049 sec

Width 5996.6 Hz

64 repetitions

OBSERVE H1, 499.7251090 MHz

DATA PROCESSING

Resol. enhancement -0.0 Hz

FT size 65536

Total time 3 min, 22 sec

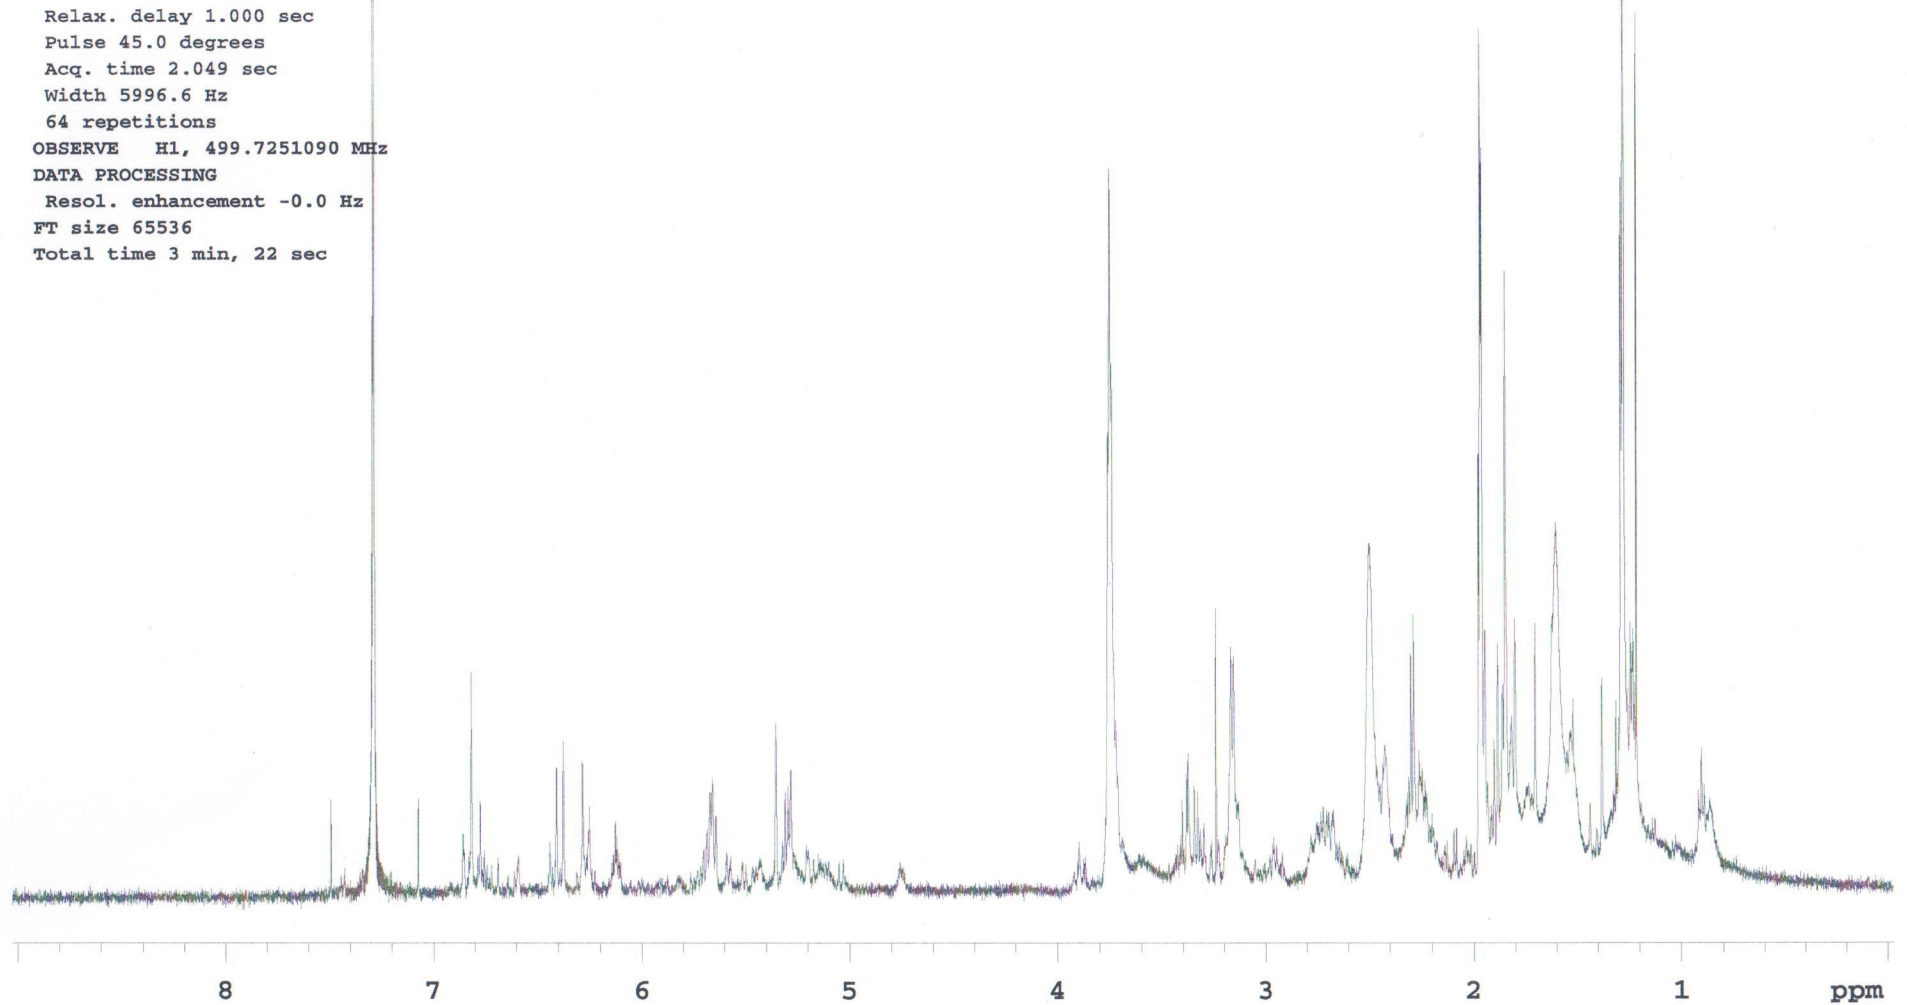

MZ220

Sample: MZ220

File: xp

Pulse Sequence: s2pul

Solvent: cdcl3  
Temp. 37.0 C / 310.1 K  
Operator: mzhu  
INOVA-500 "inova500b"

Relax. delay 1.000 sec  
Pulse 45.0 degrees  
Acq. time 2.049 sec  
Width 5993.0 Hz  
32 repetitions  
OBSERVE H1, 499.4256482 MHz  
DATA PROCESSING  
Resol. enhancement -0.0 Hz  
FT size 65536  
Total time 1 min, 44 sec

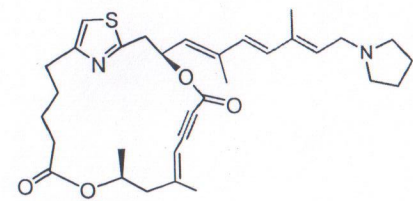

10C

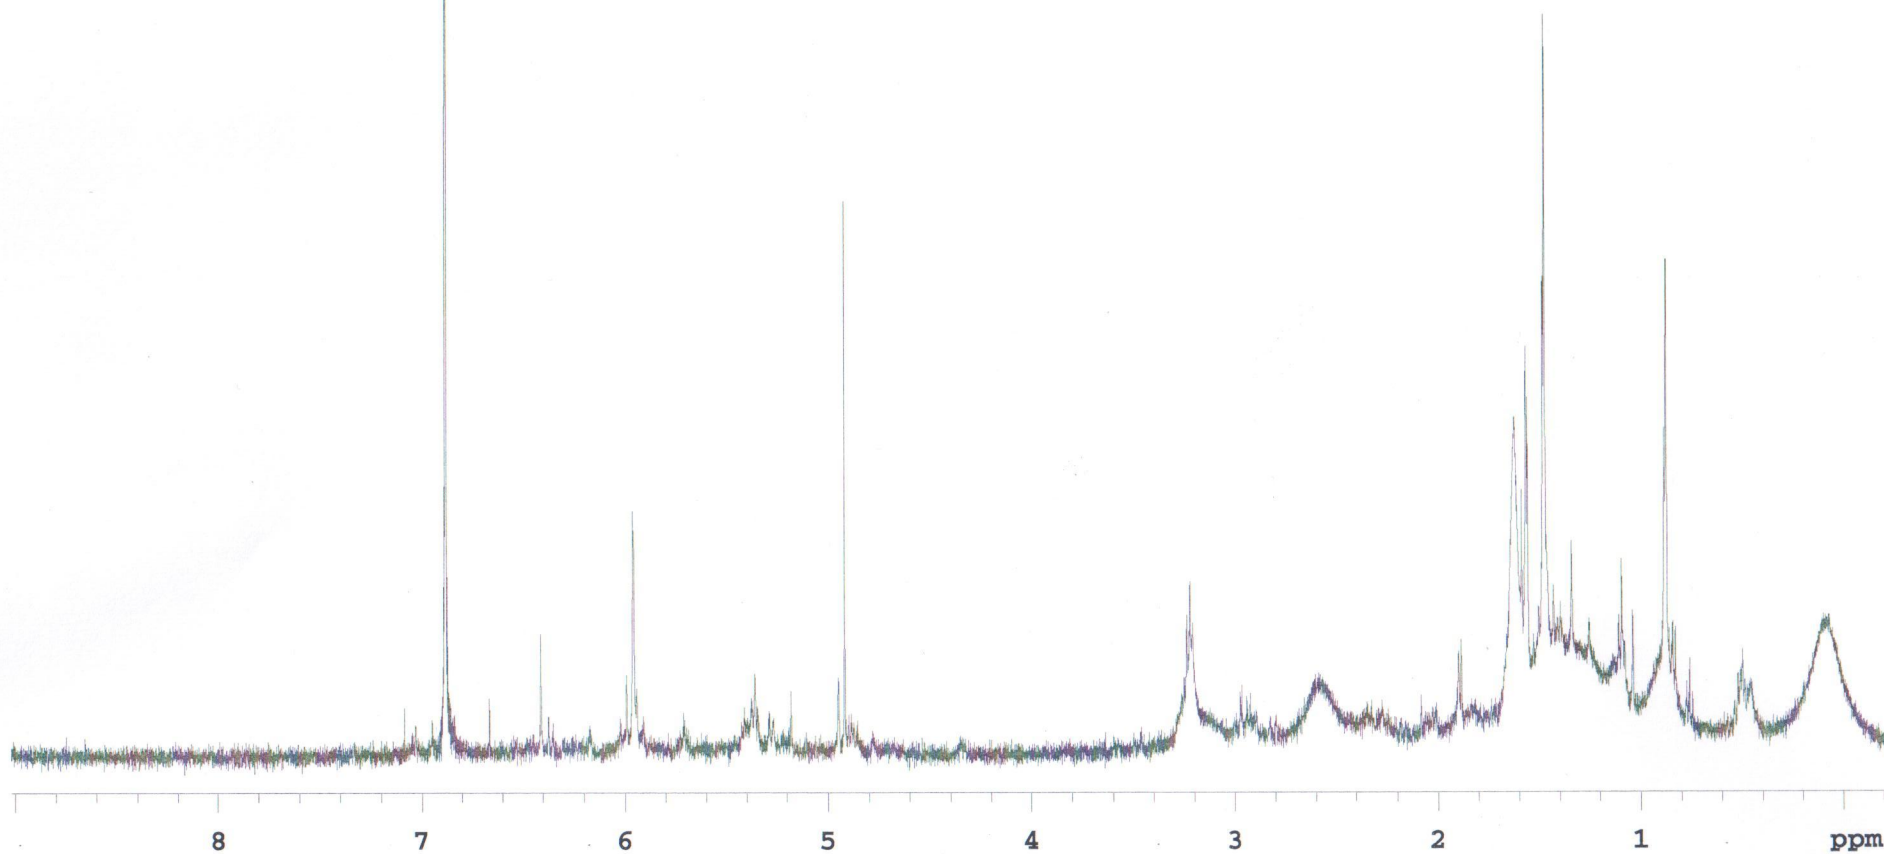

MZ221

Sample: MZ221

File: home/romo/mzhu/vnmrsys/data/MZ221

Pulse Sequence: s2pul

Solvent: cdcl3

Temp. 37.0 C / 310.1 K

Operator: mzhu

File: MZ221-rep2

INOVA-500 "inova500"

Relax. delay 1.000 sec

Pulse 45.0 degrees

Acq. time 2.049 sec

Width 7995.2 Hz

32 repetitions

OBSERVE H1, 499.7055660 MHz

DATA PROCESSING

Resol. enhancement -0.0 Hz

FT size 65536

Total time 1 min, 44 sec

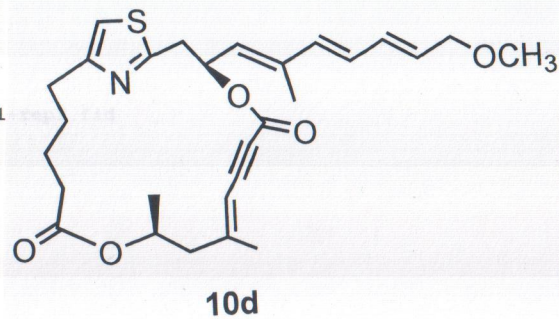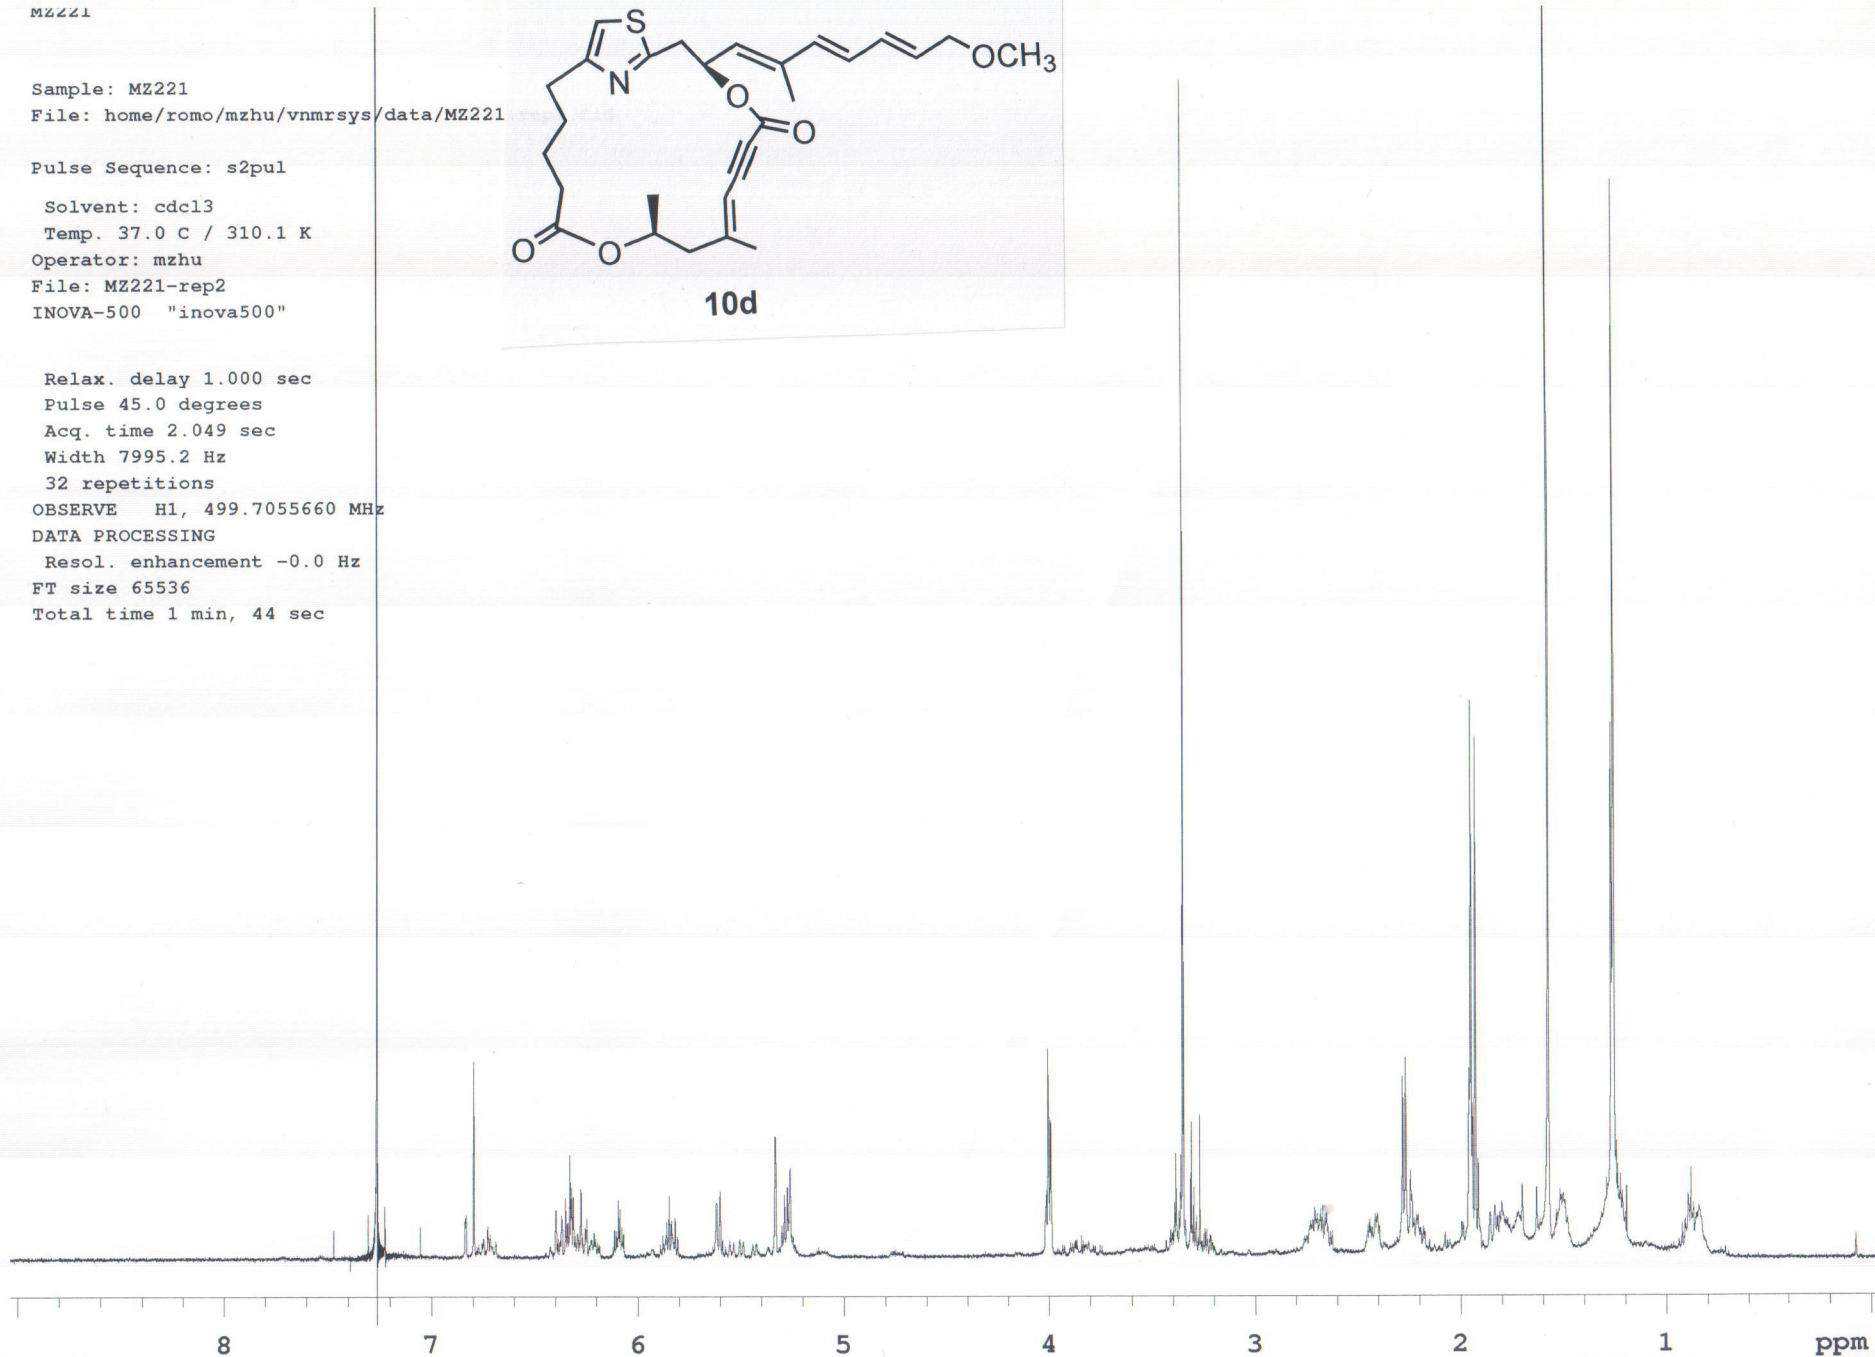

MZ217

Sample: MZ217

File: home/romo/mzhu/vnmrsys/data/MZ217-rep.fid

Pulse Sequence: s2pul

Solvent: cdcl3

Temp. 37.0 C / 310.1 K

Operator: mzhu

File: MZ217-rep

INOVA-500 "inova500"

Relax. delay 1.000 sec

Pulse 45.0 degrees

Acq. time 2.049 sec

Width 7995.2 Hz

8 repetitions

OBSERVE H1, 499.7055660 MHz

DATA PROCESSING

Resol. enhancement -0.0 Hz

FT size 65536

Total time 0 min, 31 sec

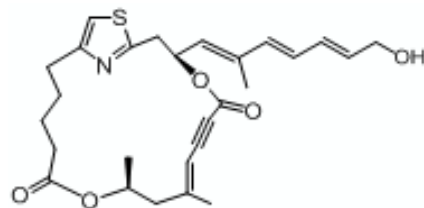

10e

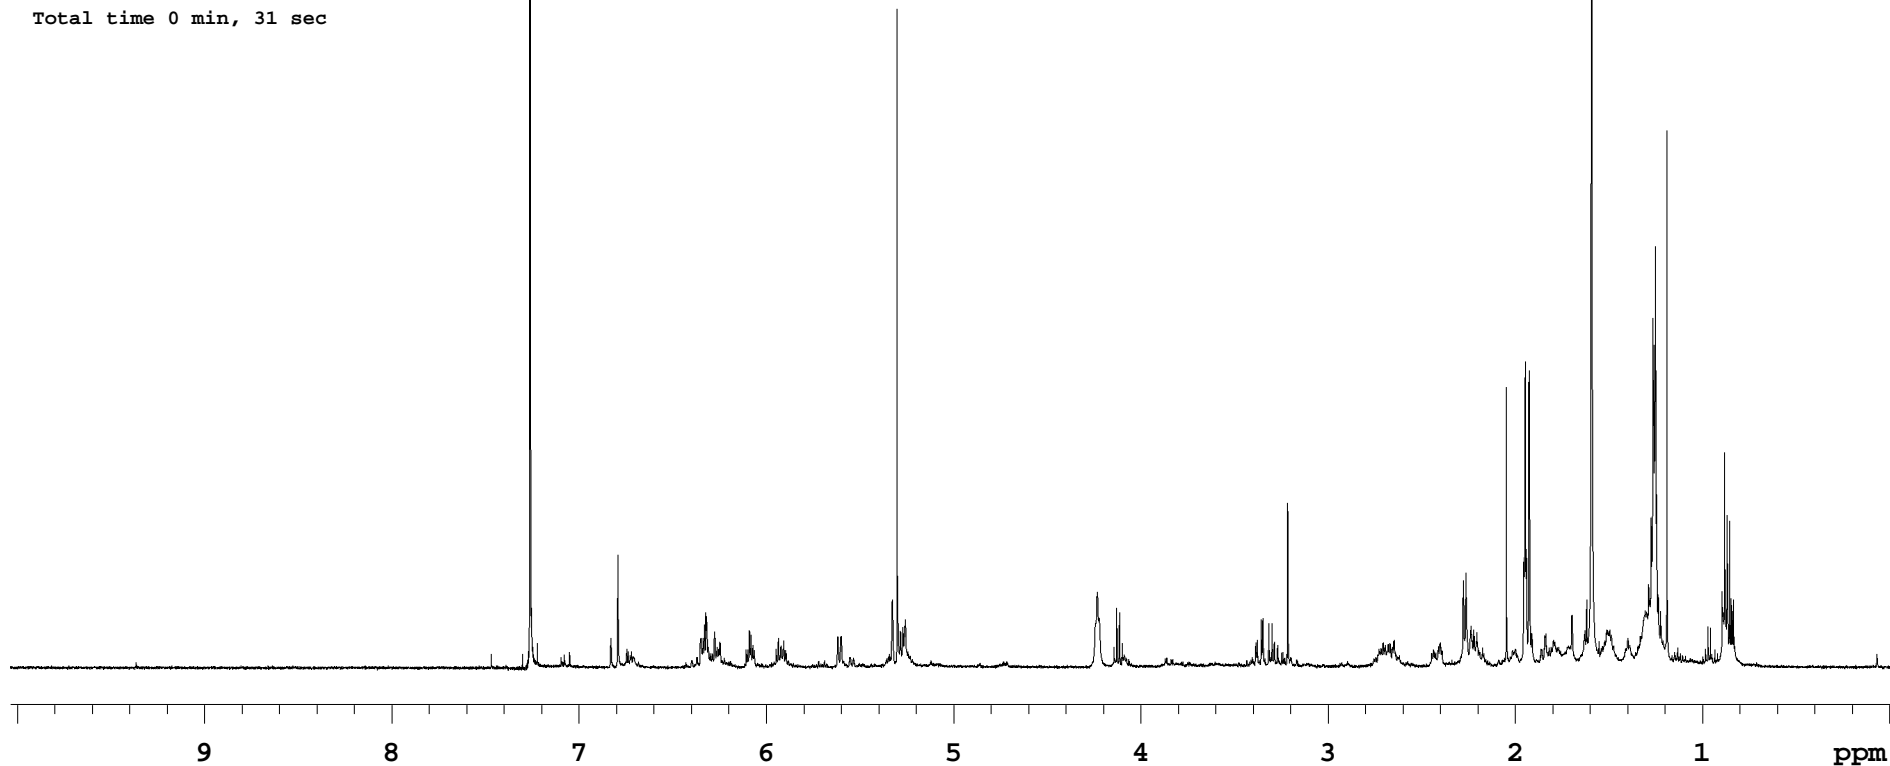



MZ201

Sample: MZ201

File: home/romo/mzhu/vnmrsys/data/MZ201-500MHz.fid

Pulse Sequence: s2pul

Solvent: cdcl3

Ambient temperature

Operator: mzhu

File: MZ201-500MHz

INOVA-500 "inova500b"

Relax. delay 1.000 sec

Pulse 45.0 degrees

Acq. time 2.049 sec

Width 5996.6 Hz

16 repetitions

OBSERVE H1, 499.7251090 MHz

DATA PROCESSING

Resol. enhancement -0.0 Hz

FT size 65536

Total time 0 min, 55 sec

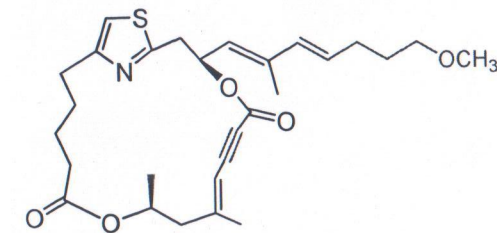

10f

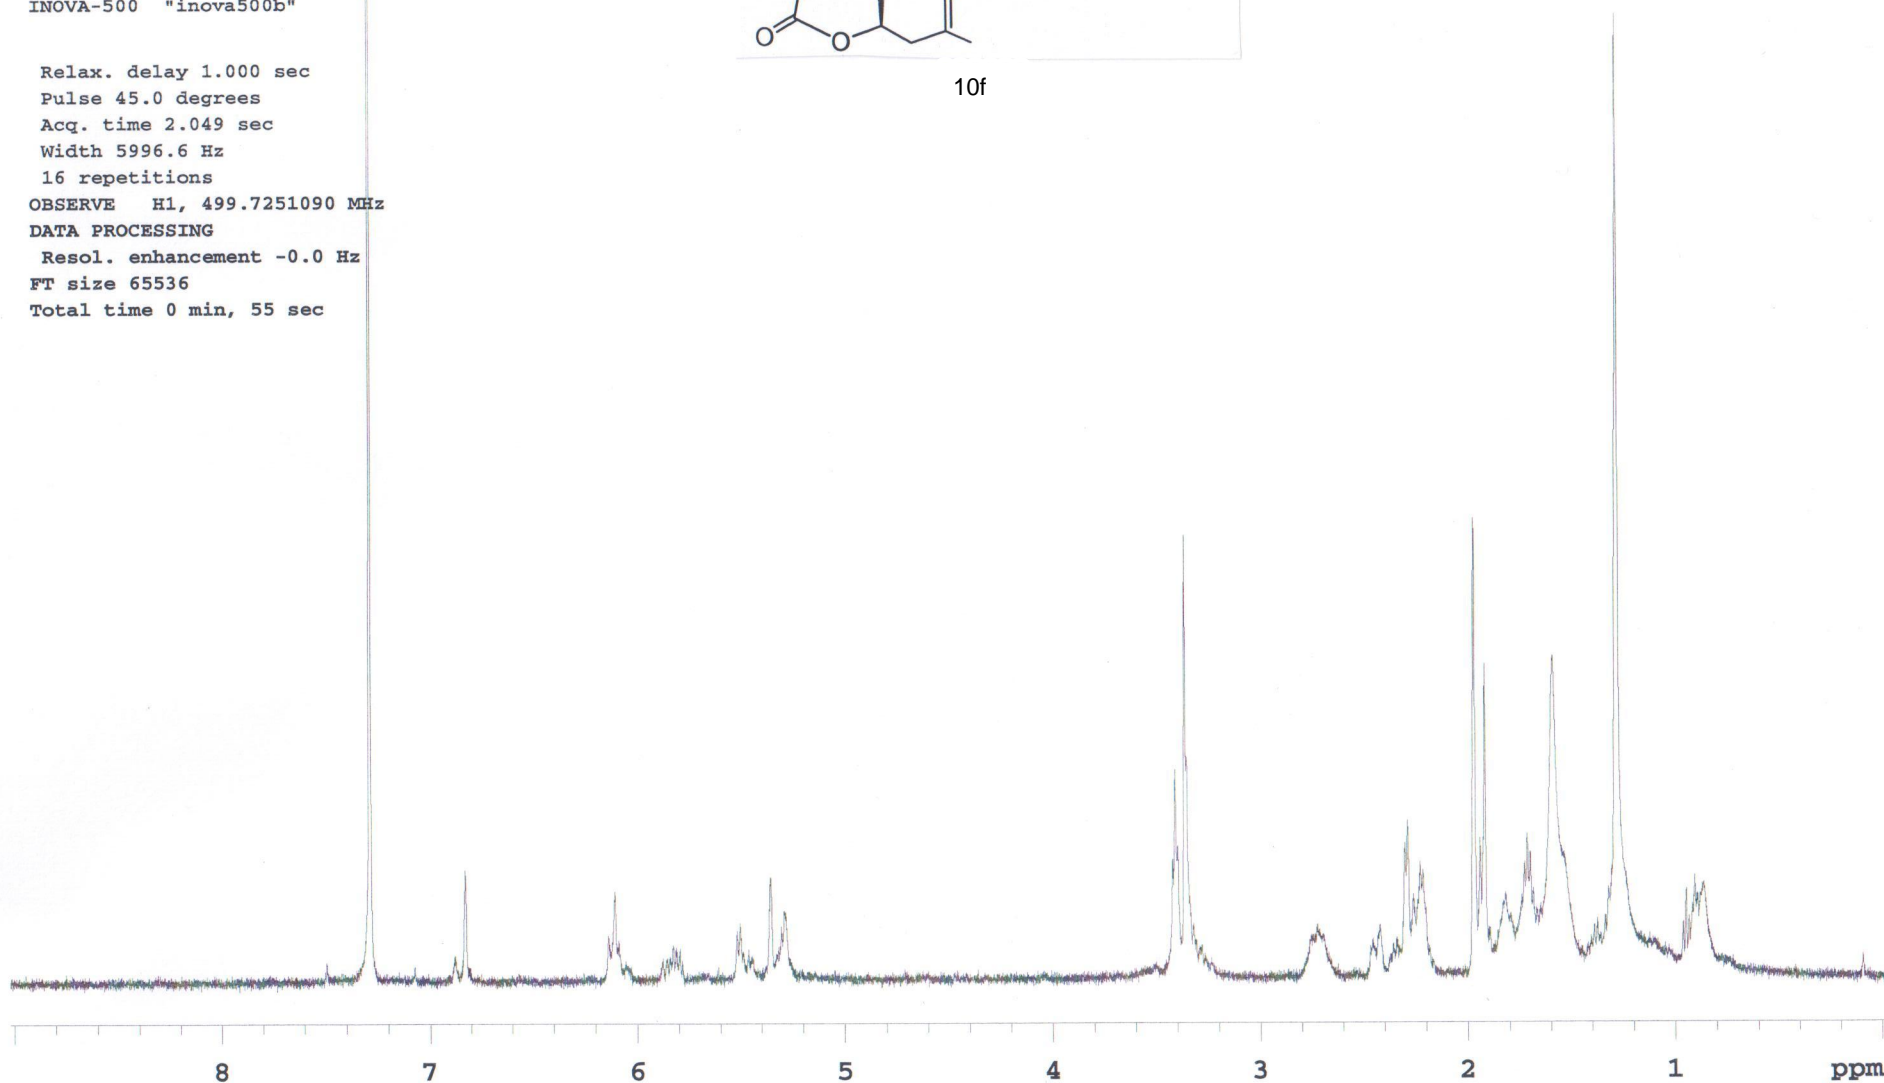

MZ200

Sample: MZ200

File: home/romo/mzhu/vnmrsys/data/MZ200-500MHz.fid

Pulse Sequence: s2pul

Solvent: cdcl3

Ambient temperature

Operator: mzhu

File: MZ200-500MHz

INOVA-500 "inova500b"

Relax. delay 1.000 sec

Pulse 45.0 degrees

Acq. time 2.049 sec

Width 5996.6 Hz

32 repetitions

OBSERVE H1, 499.7251090 MHz

DATA PROCESSING

Resol. enhancement -0.0 Hz

FT size 65536

Total time 1 min, 44 sec

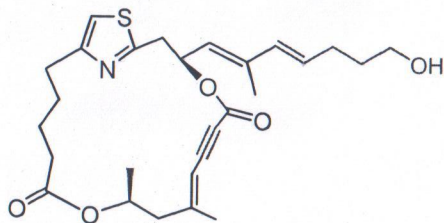

10g

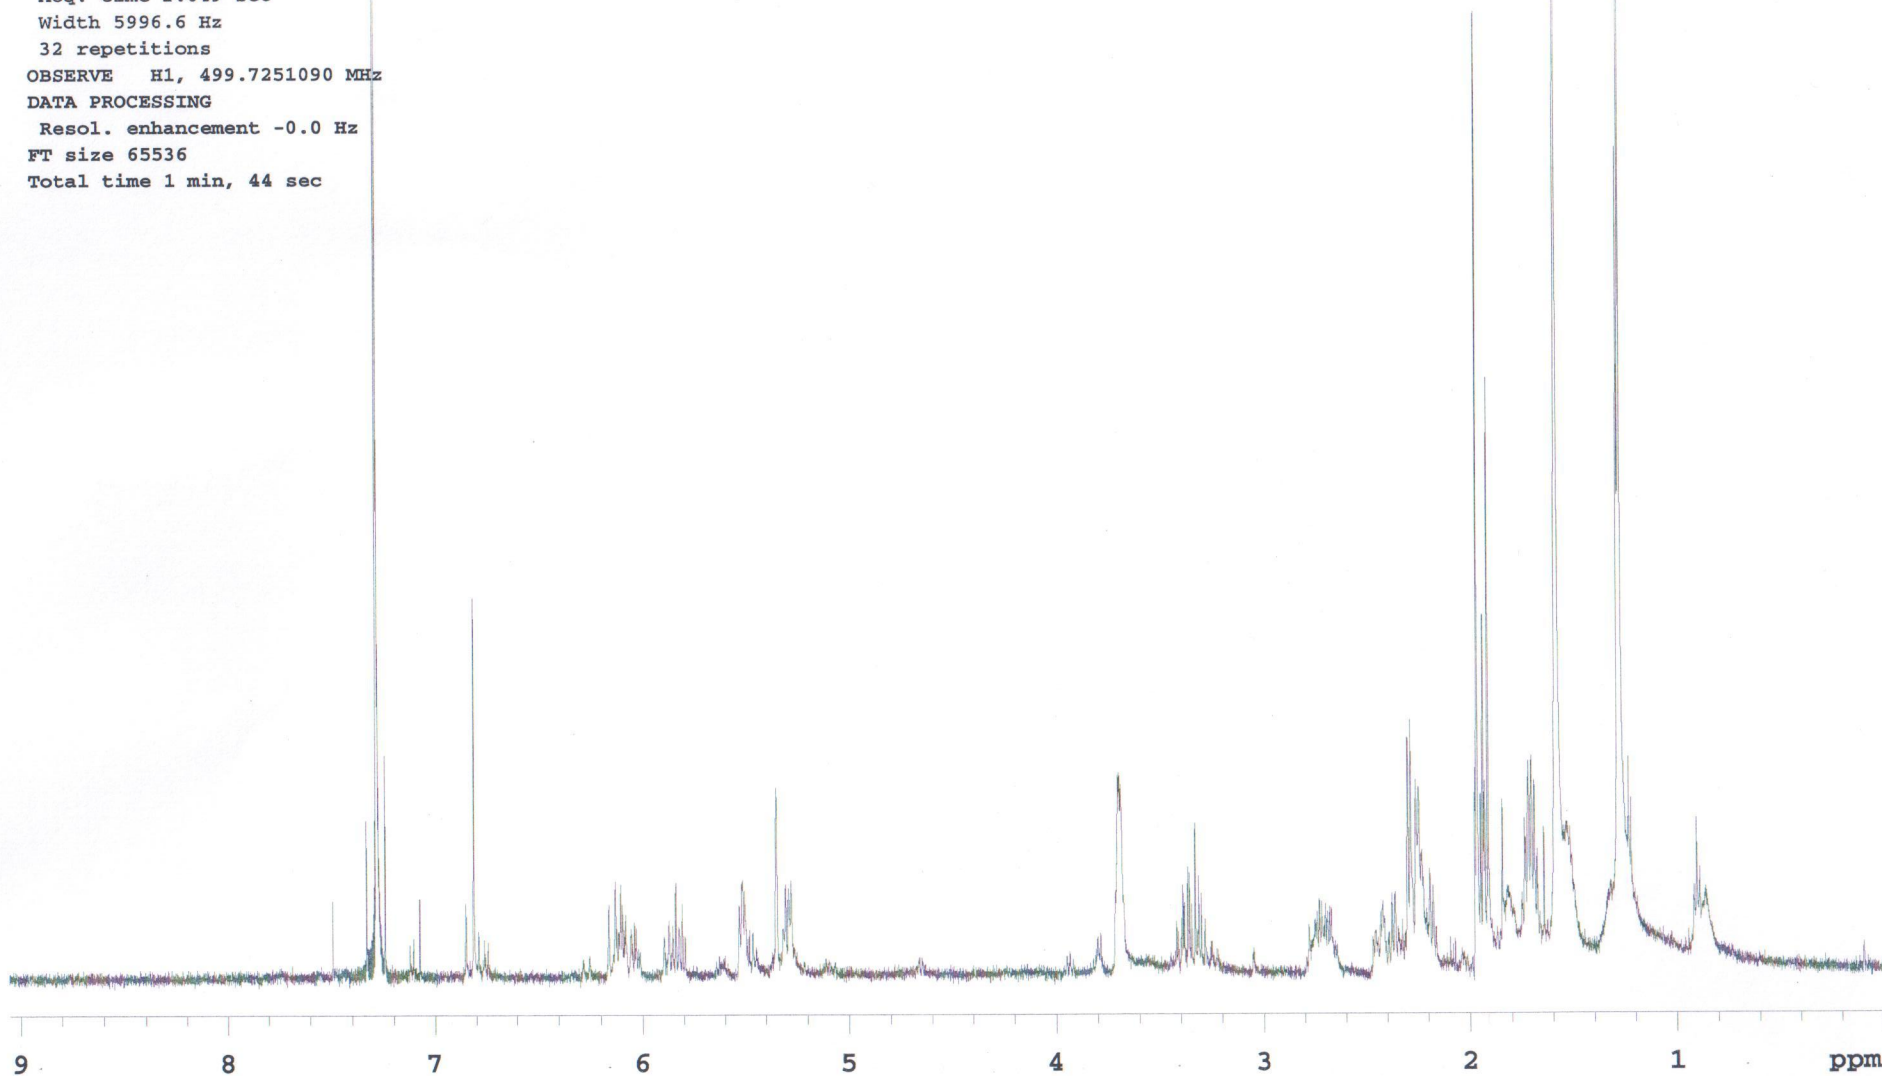

Supplement: NIHMS551812-supplement-01.pdf [file NIHMS551812-supplement-01.pdf]
